# Supplementary material for: Connection of Isolated Stereoclusters by Combining 13C-RCSA, RDC, and J-Based Configurational Analyses and Structural Revision of a Tetraprenyltoluquinol Chromane Meroterpenoid from Sargassum muticum
Source: MDPI journal article supplement (doi:10.3390/md20070462), 2022-07-18
Supplement: s1 [file s1]

# Supplementary Material

## Connection of Isolated Stereoclusters by Combining $^{13}\text{C}$ -RCSA, RDC, and *J*-Based Configurational Analyses and Structural Revision of a Tetraprenyltoluquinol Chromane Meroterpenoid from *Sargassum muticum*

Juan Carlos C. Fuentes-Monteverde<sup>1,2</sup>, Nilamoni Nath<sup>3</sup>, Abel M. Forero<sup>2</sup>, Elena Balboa<sup>4</sup>, Armando Navarro-Vázquez<sup>5</sup>, Christian Griesinger<sup>2\*</sup>, Carlos Jiménez<sup>1\*</sup>, and Jaime Rodríguez<sup>1\*</sup>

<sup>1</sup>Departamento de Química e Centro de Investigacións Científicas Avanzadas (CICA), Universidade da Coruña, 15071 A Coruña, Spain

<sup>2</sup>NMR based Structural Biology, MPI for Multidisciplinary Sciences, Am Fassberg 11, 37077 Göttingen, Germany

<sup>3</sup>Department of Chemistry, Gauhati University, Gopinath Bardoloi Nagar, Guwahati-781014, India

<sup>4</sup>Department Chemical Engineering, Faculty of Science, Campus Ourense, University of Vigo, As Lagoas s/n, 32004 Ourense, Spain

<sup>5</sup>Departamento de Química Fundamental, CCEN, Universidade Federal de Pernambuco, Cidade Universitária, Recife, Brazil

## Table of Contents

|                                                                                                                                                                                                                                                                                                                                                                                                                                                                     |           |
|---------------------------------------------------------------------------------------------------------------------------------------------------------------------------------------------------------------------------------------------------------------------------------------------------------------------------------------------------------------------------------------------------------------------------------------------------------------------|-----------|
| <b>1. Isolation of meroditerpene 1b .....</b>                                                                                                                                                                                                                                                                                                                                                                                                                       | <b>7</b>  |
| <i>Figure S1.</i> $^1\text{H}$ Spectrum (300 MHz, $\text{CD}_2\text{Cl}_2$ ) of fraction 19 (Fr. 19) from flash chromatography column (a), inset shows the characteristic doublet belonging to two meta-coupled aromatic protons from the meroditerpene skeleton (b) (300 MHz, $\text{CD}_2\text{Cl}_2$ ).....                                                                                                                                                      |           |
| <i>Figure S2.</i> HPLC isolation of compound <b>1b</b> (5.17 min) from Fr. 19. Red line indicates solvent gradient. 7                                                                                                                                                                                                                                                                                                                                               |           |
| <b>2. Spectra of meroditerpene 1b .....</b>                                                                                                                                                                                                                                                                                                                                                                                                                         | <b>8</b>  |
| <i>Figure S3.</i> HRMS spectrum of compound <b>1b</b> .....                                                                                                                                                                                                                                                                                                                                                                                                         |           |
| <i>Figure S4.</i> Experimental ECD (a) and UV (b) spectra of <b>1b</b> recorded in $\text{CH}_2\text{Cl}_2$ (c 0.2 mg/mL). Data collection parameters: data pitch of 1 nm, scanning speed of 20 nm/min, 5 accumulations, wavelength range was 224-470 nm and cell path length 1 mm. Curve smoothing algorithm used was a 3-wavelength center moving average with 4 iterations.....                                                                                  |           |
| <i>Figure S6.</i> Pure shift $^1\text{H}$ NMR spectrum of compound <b>1b</b> ( $\text{CD}_2\text{Cl}_2$ , NS: 32, 800 MHz). Inset shows assignment of H8b, H9, H4b and H14a.....                                                                                                                                                                                                                                                                                    |           |
| <i>Figure S7.</i> $^{13}\text{C}$ $\{^1\text{H}\}$ NMR spectrum of compound <b>1b</b> (zgdc30, $\text{CD}_2\text{Cl}_2$ , NS: 6 K, 200 MHz). ....                                                                                                                                                                                                                                                                                                                   |           |
| <i>Figure S8.</i> DEPT 135 spectrum of compound <b>1b</b> (dept135, $\text{CD}_2\text{Cl}_2$ , NS 800, 200 MHz).....                                                                                                                                                                                                                                                                                                                                                |           |
| <i>Figure S9.</i> Pure shift-HSQC spectrum of compound <b>1b</b> ( $\text{CD}_2\text{Cl}_2$ , NS: 32, 800 MHz). Parameters: $^1J_{\text{CH}} = 130$ Hz. (NUS: 25%/512/128). The spectrum on top is a normal $^1\text{H}$ spectrum.....                                                                                                                                                                                                                              |           |
| <i>Figure S10.</i> $^{13}\text{C}$ - $^1\text{H}$ HMBC spectrum of compound <b>1b</b> (hmbcetgpnd, $\text{CD}_2\text{Cl}_2$ , NS: 16, 800 MHz). Parameters: $^nJ_{\text{CH}} = 8$ Hz. ....                                                                                                                                                                                                                                                                          |           |
| <i>Figure S11.</i> $^1\text{H}$ - $^1\text{H}$ -DQFCOSY spectrum of compound <b>1b</b> (cosyqf45, $\text{CD}_2\text{Cl}_2$ , 800 MHz). ....                                                                                                                                                                                                                                                                                                                         |           |
| <i>Figure S12.</i> NOESY spectrum of compound <b>1b</b> (a). Relevant NOESY contacts are shown in insets b) and c). (Noesyetgp, $\text{CD}_2\text{Cl}_2$ , 800 MHz, mixing time = 300 ms). ....                                                                                                                                                                                                                                                                     |           |
| <b>3. Benchmarking DFT methods for the calculation of <math>^1J_{\text{CC}}</math>, <math>^2J_{\text{CH}}</math>, <math>^3J_{\text{CH}}</math> .....</b>                                                                                                                                                                                                                                                                                                            | <b>15</b> |
| <i>Table S1.</i> Experimental spin-spin carbon proton long range couplings ( $^{2,3}J_{\text{CH}}$ ) of minus-alpha-santonin and strychnine in isotropic solution ( $\text{DMSO-d}_6$ ) $^{\text{v}}$ .....                                                                                                                                                                                                                                                         |           |
| <i>Table S2.</i> Derived fitting parameters for the spin-spin carbon proton long range couplings ( $^{2,3}J_{\text{CH}}$ ) in isotropic solution ( $\text{DMSO-d}_6$ ). Fitting done over unsingned values.....                                                                                                                                                                                                                                                     |           |
| <i>Table S3.</i> Scaling factor correction for $^nJ_{\text{XH}}$ (X=H, C) computed at MPW1PW91/6-311+G(2d,p) (gas phase) level of theory used in the J-based analysis of <b>1b</b> . ....                                                                                                                                                                                                                                                                           |           |
| <b>4. J-Based Configurational Analysis and NOE Measurements .....</b>                                                                                                                                                                                                                                                                                                                                                                                               | <b>18</b> |
| <i>Figure S14.</i> 2D HSQMBC-IPAP spectrum (optimized to 6 Hz) after selective inversion of <b>H6b</b> (3.028 ppm) proton of meroditerpene <b>1b</b> (a). IPAP-HSQMBC $\alpha$ (blue) and $\beta$ (red) multiplets of the cross-peaks involving C13 (6.0 Hz), C8 (2.4 Hz), C19 (6.4 Hz) and C15 (1.8 Hz) (b-e). Measurement of $^3J_{\text{CH}}$ and $^5J_{\text{CH}}$ values were performed by analysis of IPAP multiplet patterns. NS: 32. NUS: 30%/640/96. ....  |           |
| <i>Figure S15.</i> 2D HSQMBC-IPAP spectrum (optimized to 6 Hz) after selective inversion of <b>H6a</b> (2.237 ppm) proton of meroditerpene <b>1b</b> (a). IPAP-HSQMBC $\alpha$ (blue) and $\beta$ (red) multiplets of the cross-peaks involving C13 (5.2 Hz), C19 (3.4 Hz), C11 (6.2 Hz) and C15 (1.4 Hz) (b-e). Measurement of $^3J_{\text{CH}}$ and $^5J_{\text{CH}}$ values were performed by analysis of IPAP multiplet patterns. NS:32. NUS: 33%/640/104. .... |           |
| <i>Figure S16.</i> 2D HSQMBC-IPAP spectrum (optimized to 6 Hz) after selective inversion of <b>H10b</b> (1.441 ppm) proton of meroditerpene <b>1b</b> (a). IPAP-HSQMBC $\alpha$ (blue) and $\beta$ (red) multiplets of the cross-peaks                                                                                                                                                                                                                              |           |

involving C18 (5.2 Hz), C8 (4.1 Hz) and C7 (5.5 Hz) (b-d). Measurement of  $^3J_{CH}$  values were performed by analysis of IPAP multiplet patterns. NS: 32. NUS: 23%/640/73. .... 19

**Figure S17.** 2D HSQMBC-IPAP spectrum (optimized to 6 Hz) after selective inversion of **H10a** (1.944 ppm) proton of meroditerpene **1b** (a). IPAP-HSQMBC  $\alpha$  (blue) and  $\beta$  (red) multiplets of the cross-peaks involving the C12 (3.8 Hz), C18 (8.2 Hz) and C8 (1.0 Hz) (b-c). Measurement of  $^nJ_{CH}$  values were performed by analysis of IPAP multiplet patterns.  $^3J_{C8H10a}$  was extracted from an HSQMBC-IPAP spectrum optimized to 1.5 Hz (d). NS: 32. NUS: 23%/640/73. .... 19

**Figure S18.** 2D HSQMBC-IPAP spectrum (optimized to 2 Hz) after selective inversion of **H6a** (2.237 ppm) proton of meroditerpene **1b** (a). IPAP-HSQMBC  $\alpha$  (blue) and  $\beta$  (red) multiplets of the cross-peaks involving C3 (1.1 Hz) (b). 2D HSQMBC-IPAP spectrum (optimized to 2 Hz) after selective inversion of **H6b** (3.028 ppm) proton of meroditerpene **1b** (c). IPAP-HSQMBC  $\alpha$  (blue) and  $\beta$  (red) multiplets of the cross-peaks involving C3 (1.7 Hz) and C11 (1.8 Hz) (d,e). Measurement of  $^nJ_{CH}$  values were performed by analysis of IPAP multiplet patterns (CD<sub>2</sub>Cl<sub>2</sub>, 700MHz). NS: 104. NUS parameters: 13%/512/17. .... 20

**Table S4.**  $^{13}C$ - $^1H$  coupling constants for compound **1b**. .... 21

**Figure S19.** Detail of the 2D NOESY spectra of **1b** (a), selective NOE irradiation of H19 (b) and selective irradiation of H18 (c) of compound **1b**. (CD<sub>2</sub>Cl<sub>2</sub>, NS: 320, 800 MHz). Mixing time: 450 ms. .... 22

**Figure S20.** Detail of the 2D NOESY spectrum of **1b** (a). Observed NOESY contacts between H2 protons and H20, subjecting the existence of 2 conformations in the chromane fragment; strong NOE contact is indicated with a green dashed arrow, while weak NOE contact is indicating with a blue dashed arrow (b). In the conformation on the left H2a is far from H20 while in conformation on the right both protons have a similar distance to H20. .... 22

**Figure S21.** Equilibrium of the P-helicity (left conformation) and M-helicity (right conformation) conformers in the chromane fragment of **1b** and its impact on the J coupling value. .... 23

**Figure S22.** 2D HSQMBC-IPAP spectrum of **1b** (optimized to 6 Hz) after selective inversion of **H2a** (1.859 ppm) proton of meroditerpene **1** (a). IPAP-HSQMBC  $\alpha$  (blue) and  $\beta$  (red) multiplets of the cross-peaks involving C20 (3.6 Hz), C4 (1.7 Hz), C2' (4.1 Hz), C1(-3.7 Hz\*) and C3 (3.4 Hz) to H2a (b-f). 2D HSQMBC-IPAP spectrum (optimized to 6 Hz) after selective inversion of **H2b** (1.805 ppm) proton of meroditerpene **1b** (g). IPAP-HSQMBC  $\alpha$  (blue) and  $\beta$  (red) multiplets of the cross-peaks involving C20 (1.8 Hz), C4 (3.6 Hz), C2' (4.4 Hz), C1 (-3.8 Hz\*) and C3 (2.8 Hz) to H2b (h-l). Measurement of  $^{2,3}J_{CH}$  values were performed by analysis of IPAP multiplet patterns. NS: 48. NUS: 11%/640/35. \*Sign determined from HSQC-HECADE..... 24

## 5. J-Based and NOE analysis around the rotatable bounds ..... 25

**Figure S23.** Molecular structure of **1b**. Relevant rotatable bounds considered in the PC Model conformational search/J-based analysis/quantitative NOE are indicated in blue arrows. .... 25

**Figure S24.** Newman projection of rotamers of **1b** around  $\rho_1$  [H4b-C4-C3-C20]; computed  $^2J_{C3H4}$  are indicated in dark red (a). 2D HSQMBC-IPAP spectrum (optimized to 6 Hz) after selective inversion of **H4b** (2.705 ppm) proton of meroditerpene **1b** (b). IPAP-HSQMBC  $\alpha$  (blue) and  $\beta$  (red) multiplets of the cross-peaks involving H4b-C2 (2.1 Hz), H4b-C20 (0.2 Hz) and H4b-C3 (1.9 Hz) (c-e). 2D HSQMBC-IPAP spectrum (optimized to 6 Hz) after selective inversion of **H4a** (2.514 ppm) proton of meroditerpene **1b** (f). IPAP-HSQMBC  $\alpha$  (blue) and  $\beta$  (red) multiplets of the cross-peaks involving H4a-C2 (2.0 Hz), H4a-C20 (5.6 Hz) and H4a-C3 (6.7 Hz) (g-i). Measurement of  $^{2,3}J_{CH}$  values were performed by analysis of IPAP multiplet patterns. Detail of 2D NOESY spectrum showing the NOE contact between H4b and H20, and between H14a and H20 (j). NS: 72. NUS: 18%/640/57.  $^nJ_{CH}$  were computed at GIAO/OLYP/Def2TZV (gas phase) level. .... 26

**Figure S25.** Newman projection of rotamers around of **1b**  $\rho_2$  [H4b-C4-C5-C13] (a). Computed J-couplings of possible rotamers around  $\rho_2$  (level of theory GIAO/OLYP/Def2TZV) and experimental J-coupling of **1b** (b). IPAP-HSQMBC  $\alpha$  (blue) and  $\beta$  (red) multiplets of the cross-peaks involving **H4b**

(2.705 ppm) to C13 (4.2 Hz), C6 (6.0 Hz) and C5 (5.0 Hz); and multiplets of the cross-peaks involving **H4a** (2.514 ppm) to C13 (5.6 Hz), C6 (3.6 Hz) and C5 (4.9 Hz). Measurement of  $^{2,3}J_{CH}$  values were performed, as before, by analysis of IPAP multiplet patterns. (c-h). Selective 1D-NOESY spectrum of H4b showing the NOE contact between H14b (2.570 ppm), H2a, H2b, H20 and H17 (i). 3D model of 3S\*,7R\*,11S\* showing NOE contact between H4b and H14b and between H4a and H6a (j). Detail of 2D NOESY spectrum of meroditerpene **1b** showing the interaction between H4a and H6a (k). ..... 27

**Figure S26.** Rotamer fragment around  $\rho_3$  [C12-C13-C14-C15] of meroditerpene **1b** (a). Relevant experimental and computed (level of theory GIAO/OLYP/Def2TZV)  $^{2,3}J_{CH}$  around  $\rho_3$  (b). Molecular model of compound **1b**, showing NOE (indicated by a green dashed arrow) contacts between H14b and H4b, H20, H16 and H17, between H4a and H6a, and finally between H20 and H18 (c.1). Selective 1D NOESY spectrum of H14b showing the NOE contact between H4b and H16, H17, and H20 (c.2). Selective 1D NOESY spectrum of H18 showing the NOE contact with H20 (c.3). Selective 1D NOESY spectrum of H19 showing the NOE contact with H6a, H10a, H8a, and H17 (c.4). 2D HSQMBC-IPAP spectrum (optimized to 6 Hz) after selective inversion of **H14b** (2.570 ppm) proton of compound **1b** (d). IPAP-HSQMBC  $\alpha$  (blue) and  $\beta$  (red) multiplets of the cross-peaks involving from left to right H14b to C12 (5.3 Hz), H14b to C5 (3.9 Hz), H14b to C13 (4.6 Hz), **H14a** to C12 (3.7 Hz) and finally H14a to C5 (5.2 Hz) (e-i). Measurement of  $^{2,3}J_{CH}$  values were performed by analysis of IPAP multiplet patterns. NR: Not readable ..... 28

**Figure S27.** Rotamer fragment around  $\rho_4$  [C13-C14-C15-C16] of meroditerpene **1b** (a-c). Experimental and computed (GIAO/OLYP/DEF2TZV)  $^{2,3}J_{CH}$  around  $\rho_4$  (d). Selective 1D NOESY spectrum of H17 showing the NOE contact between H19, H14b, H14a, H4b and H16 (e.1). Correlations are indicated in a molecular model. H17 does not show NOE contact with the chromane system (e.2). Slice from a 2D NOESY spectrum showing NOE contacts from H16 to H1, H2a, H2b, H4b, H14a and H14b (e.3). Correlations are shown in a molecular model. H17 does not show NOE contact with the bicyclo[4.3.0]nonane moiety (e.4). IPAP-HSQMBC  $\alpha$  (blue) and  $\beta$  (red) multiplets of the cross-peaks involving H14b (2.570 ppm) to C16 (1.3 Hz), H14b to C17 (2.4 Hz), H14a (2.506 ppm) to C16 (1.8 Hz), H14a to C17 (4.5 Hz), H14b to C15 (4.1 Hz) and H14a to C15 (5.9 Hz) (d-i). Measurement of  $^{2,3}J_{CH}$  values were performed by analysis of IPAP multiplet patterns. NOE 1D experiment on selective inversion over OH-C15 (j). ..... 29

**Figure S28.** NOE 1D experiment of **1b** on selective inversion over Me-C6' showing NOE contacts to H6b, H20, H8 and H19. (CD<sub>2</sub>Cl<sub>2</sub>, NS: 400, 800 MHz). Parameters: Mixing time: 450 ms. .... 30

**Figure S29.**  $^1H$  1D spectrum section of **1b** from 1 ppm until 1.3 ppm at 298.1 K (red line) and at 280 K (blue line) (a,b). Selective NOE experiment over H20 at 280 K (c), showing in the inset (green dashed box) NOE contacts between H20 and H4b, H14b and H4a (d). Both experiments were measured in a 950 MHz Bruker spectrometer (Pulprog: selnpg, NS: 40, mixing time: 500 ms). ..... 30

**Figure S30.** J-modulated ADEQUATE spectrum of **1b** (adeq11etgpcrdsp) (a). Parameters:  $^1J_{CH}$  = 138 Hz,  $^1J_{CC}$  = 40 Hz, Scaling factor = 8, relaxation delay = 1.5 s, NUS: 35%/512/89. (800 MHz/CD<sub>2</sub>Cl<sub>2</sub>). ..... 31

**Figure S31.** Carbon-proton coupling constants from an IPAP-HSQMBC experiment and NOE contacts to relate C3, C7, and C11 stereogenic centers of (3S\*,7S\*,11R\*)-**1b**.  $^2J_{CH}$  sign was measured as absolute value. .... 31

**Table S5.** DP4 (a) and iJ-DP4 (b) Analysis of **1b**. **1**=(3R7S11R)-**1b**, **2**=(3S7S11R)-**1b**. ..... 32

## 6. Anisotropic measurements of **1b** ..... 41

**Figure S32.** Experimental arrangement needed for our in-house-made 3 mm compression device. Complete alignment system shown here includes: a common 3 mm NMR tube, swallowed PMMA (75/0.25) gel in CDCl<sub>3</sub>, and the semi-micro compression apparatus (a). Fully relaxed swallowed gel stick ideally has a length of 4.5 cm length, while when it is fully compressed has a length of 3.5 cm. (b). Compression device consists of a clamping head/nut and fastening screws, which keep the plunger



attached to the 3 mm glass NMR tube when the gel stick is under compression (c). Gel was orange colored using a pigment from Faber Castell. .... 41

**Figure S33.**  $^{13}\text{C}$   $\{^1\text{H}\}$  spectrum of estrone (800  $\mu\text{g}$ ) swollen in relaxed Poly-HEMA (80/0.27) in a 3 mm compression device. Number of scans 16K. (a). Under anisotropic conditions  $\Delta^2H_Q$  was 4.6 Hz (b). (NS = 16K, 600 MHz,  $\text{DMSO-d}_6$ )..... 41

**Figure S34.** Chemical structure of estrone (a) and 13-epi-estrone (b). The quality of the data fitting is expressed as a quality factor (Q) where the correct structure is expected to have the lowest Q value. Results from the in-house 3 mm compression device: Q (blue) and  $Q_{\text{CSA}}$  (grey) factors calculated for lowest-energy structures of estrone and 13-epi-estrone from DFT calculation (GIAO/MPW1PW91/6-31+g(2d,p) iefpcm=DMSO) using only  $^{13}\text{C}$  RCSAs. .... 42

**Table S6.** Estrone uncorrected residual chemical shift anisotropies data (Hz) analyzed in a 3 mm compression device..... 42

**Figure S35.**  $^{13}\text{C}$   $\{^1\text{H}\}$  spectrum of **1b** swallow on PMMA- $\text{H}_8$  measured in a 950 MHz Bruker spectrometer (5 mm compression device) (a). Buried resonances of **1b** below polymer background signal: MeO-C4', C11, C7, C4 and C6 are shown. In blue, isotropic  $^{13}\text{C}$   $\{^1\text{H}\}$  spectrum of **1b** (2 mg sample in an 800 MHz Bruker spectrometer) and in red  $^{13}\text{C}$   $\{^1\text{H}\}$  spectrum of **1b** swallow in PMMA- $\text{H}_8$  (4 mg) (b). NS: 2048. Relaxation delay: 2 s. .... 43

**Figure S36.**  $^{13}\text{C}$   $\{^1\text{H}\}$  spectrum of **1b** swallow on PMMA- $\text{d}_8$  measured in an 800 MHz Bruker spectrometer (in-house-made 3 mm compression device) (a). Former buried resonances of **1b** below polymer background are visible now: MeO-C4', C11, C7, C4 and C6. Isotropic contribution of some resonances is marked with an asterisk. Sample mass 2.2 mg. NS: 7200. Relaxation delay: 2 s. .... 43

**Preparation of deuterated compression compatible PMMA gel (PMMA- $\text{d}_8$  gel)** ..... 44

**Figure S37.**  $1\text{D}^2\text{H}$  spectrum of  $\text{CD}_2\text{Cl}_2$  in the sample of compound **1b**, when PMMA- $\text{d}_8$  gel stick is fully relaxed (a).  $^2\text{H}$  spectrum of  $\text{CD}_2\text{Cl}_2$  on fully compressed PMMA- $\text{d}_8$  gel (b), and evolution of it through the time. Experimental time is expressed in hours (Exp. Time) (c-d). PMMA- $\text{d}_8$  yields a stable  $\Delta^2H_Q$  (4.2 Hz) during at least 41 h. (Solvent  $\text{CD}_2\text{Cl}_2$ )..... 44

**Figure S38**  $^{13}\text{C}$ -RCSA analysis of meroditerpene **1b** swollen in 70/0.25 PMMA- $\text{d}_8$  gel (200 MHz,  $\text{CD}_2\text{Cl}_2$ ) Fitting for carbon residual chemical shift anisotropies of diastereoisomers (**3R\*,7S\*,11R\***)-**1b** (a) and (**3S\*,7S\*,11R\***)-**1b** (b), when automatic isotropic shift correction is not applied. Q factors were 0.164 (a) and 0.358 (b). .... 44

**Figure S39.** Resample influence bar-plot for the Jackknife analysis of  $^{13}\text{C}$  RCSA of compound **1b**. .... 45

**Figure S40.** Bootstrapping bell curves for  $^{13}\text{C}$  RCSA analysis of (**3R\*,7S\*,11R\***)-**1b** and (**3S\*,7S\*,11R\***)-**1b** are indicated in green line and dashed blue line, respectively. Inspection of bell curves derived from Bootstrapping, made discrimination between diastereoisomers evident. (Sample size = 5000 points, distribution: Gaussian)..... 46

**Figure S41.** Bootstrapping bell curves for  $1\text{D}_{\text{CH}}$  analysis of (**3R\*,7S\*,11R\***)-**1b** and (**3S\*,7S\*,11R\***)-**1b** are indicated in green and dashed blue, respectively. (Sample size = 5000 points, distribution: Gaussian). .... 46

**Figure S42.** Bar plots for the CASE-3D analysis (AIC: black,  $\chi^2$ : green) of both plausible configurations of compound **1b**. When conformer populations are fitted to its minimum by NMR isotropic data (a) and when populations were weighted by DFT energies at B3LYP/6-31G(d,p) level (b). Study was done on the same batch of conformers used in the J-DP4 analysis. The (**3R\*,7S\*,11R\***)-**1b** configuration scores better..... 47

**Figure S43.**  $^1\text{H}$ -1D experiment (a) and  $^{13}\text{C}$   $\{^1\text{H}\}$  spectrum (b) of **1b** recovered from the anisotropic sample (PMMA- $\text{d}_8$ ), NS was 16 and 800 respectively. No polymer resonances were observed in both  $^{13}\text{C}$   $\{^1\text{H}\}$  and  $^1\text{H}$  1D spectra of the recovered sample (b). Comparison between the  $^{13}\text{C}$   $\{^1\text{H}\}$  spectrum

|                                                                                                                                                                                                                                                                                                                                                                                                                          |    |
|--------------------------------------------------------------------------------------------------------------------------------------------------------------------------------------------------------------------------------------------------------------------------------------------------------------------------------------------------------------------------------------------------------------------------|----|
| PMMA-H8 (blue) and PMMA-d <sub>8</sub> (red) (d); it is evident the reduction in the polymer background signal when PMMA-d <sub>8</sub> is used. Experiments were measured either at 800 or 950 MHz/CD <sub>2</sub> Cl <sub>2</sub> . ....                                                                                                                                                                               | 48 |
| <b>Table S7.</b> Uncorrected carbon residual chemical shift anisotropies data (Hz) for <b>1b</b> . C14 was taken as reference.....                                                                                                                                                                                                                                                                                       | 49 |
| <b>7. Absolute configuration of 1b by TD-DFT ECD.</b> .....                                                                                                                                                                                                                                                                                                                                                              | 50 |
| <b>Figure 44.</b> Calculated (red line) and experimental (black line) ECD of the conformers of <b>(3R,7S,11R)-1b</b> (a) and <b>(3S,7R,11S)-1b</b> (c). Conformers and its population are displayed in panels b and d respectively. Conformers were weighted by NMR anisotropy. ECD was computed at level: HSE0/6-311G+(2d,p)/DGA1 (solvent model/parameters/n-states: IEFPCM/CH <sub>2</sub> Cl <sub>2</sub> /38) ..... | 50 |
| <b>Figure 45.</b> Calculated (red line) and experimental (black line) ECD of the conformers of <b>(3R,7S,11R)-1b</b> (a) and <b>(3S,7R,11S)-1b</b> (c). Conformers and its population are displayed in panels b and d respectively. Conformers were weighted by NMR anisotropy. ECD was computed at level: PBE0/Def2TZV/W06 (solvent model/parameters/n-states: COSMO/CH <sub>2</sub> Cl <sub>2</sub> /50). ....         | 51 |
| <b>Table S8.</b> Comparison of experimental and calculated $\alpha_D25$ values for compound <b>1b</b> and both stereoisomers pairs. Optical rotation ( $\alpha_D25$ ) was computed at CAM-B3LYP/6-311++(2d,2p)/DGA1 IEFPCM (CH <sub>2</sub> Cl <sub>2</sub> ) level of theory. ....                                                                                                                                      | 51 |
| <b>8. DFT Calculations for (-)-<math>\alpha</math>-santonin</b> .....                                                                                                                                                                                                                                                                                                                                                    | 52 |
| <b>Table S9.</b> Functional-basis set combinational used on (-)- $\alpha$ -santonin test systems. ....                                                                                                                                                                                                                                                                                                                   | 52 |
| <b>Table S10.</b> Computation time needed for various combinations of functional/basis set combinational. Test systems: (-)- $\alpha$ -santonin. ....                                                                                                                                                                                                                                                                    | 53 |
| <b>9. Molecular coordinates</b> .....                                                                                                                                                                                                                                                                                                                                                                                    | 54 |
| <b>10. Z-matrices and CSA tensors</b> .....                                                                                                                                                                                                                                                                                                                                                                              | 60 |
| <b>11. Alignment tensors</b> .....                                                                                                                                                                                                                                                                                                                                                                                       | 95 |

## 1. Isolation of meroditerpene 1b

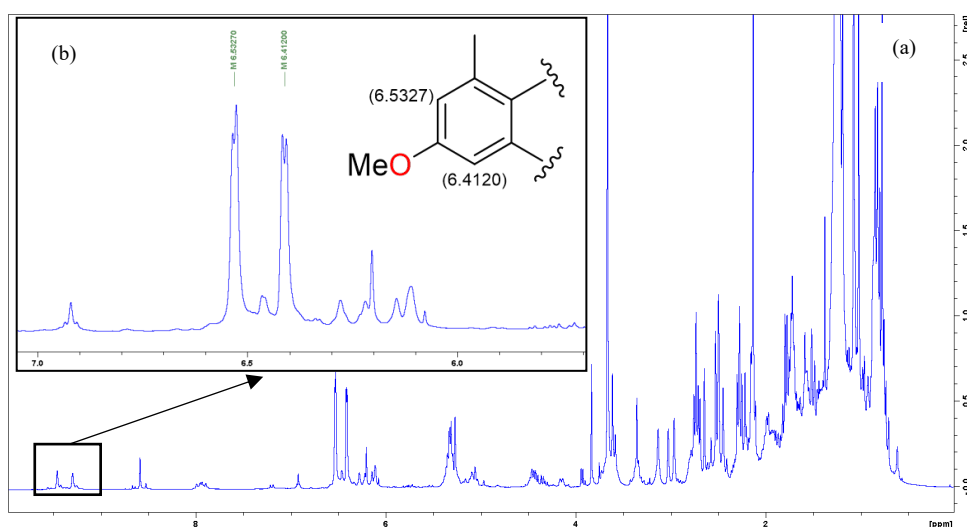

**Figure S1.**  $^1\text{H}$  Spectrum (300 MHz,  $\text{CD}_2\text{Cl}_2$ ) of fraction 19 (Fr. 19) from flash chromatography column (a), inset shows the characteristic doublet belonging to two meta-coupled aromatic protons from the meroditerpene skeleton (b) (300 MHz,  $\text{CD}_2\text{Cl}_2$ ).

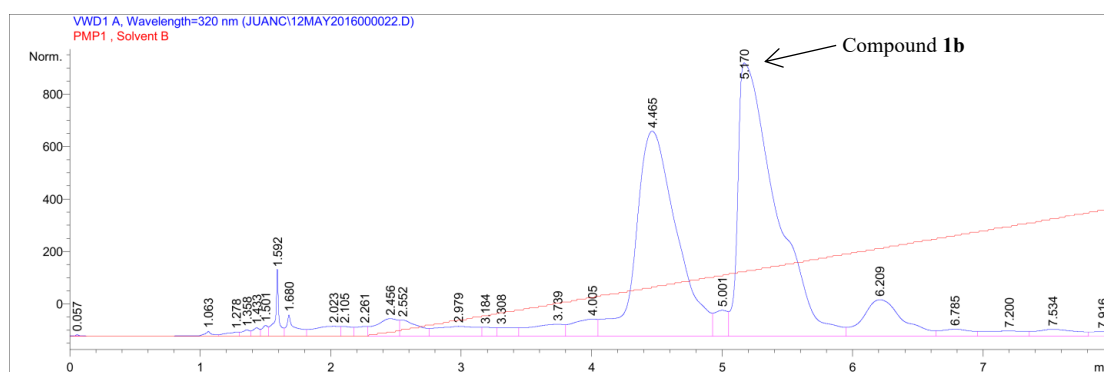

**Figure S2.** HPLC isolation of compound 1b (5.17 min) from Fr. 19. Red line indicates solvent gradient.

## 2. Spectra of meroditerpene 1b

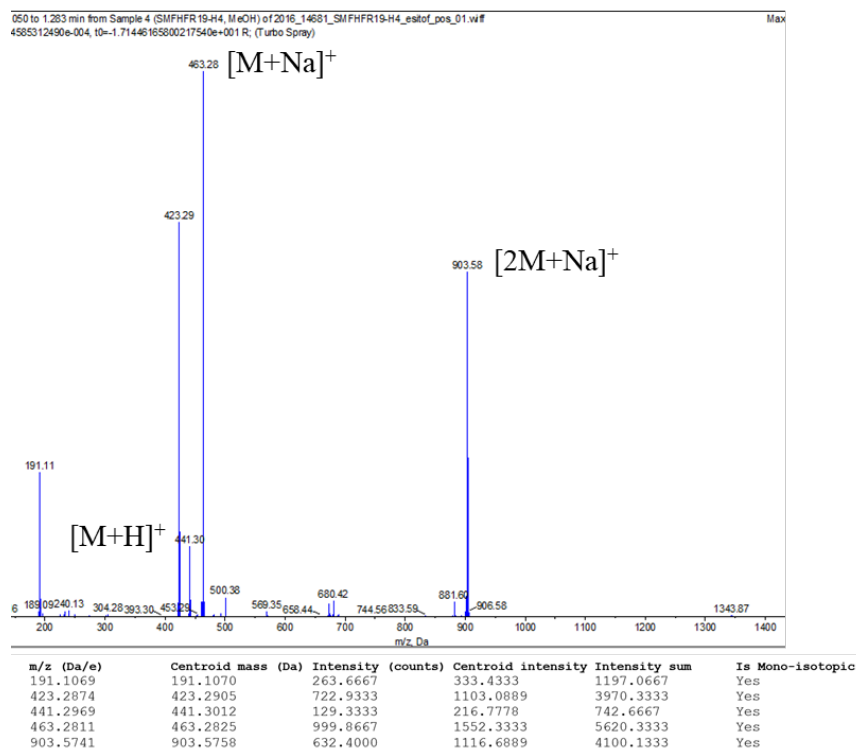

**Figure S3.** HRMS spectrum of compound **1b**.

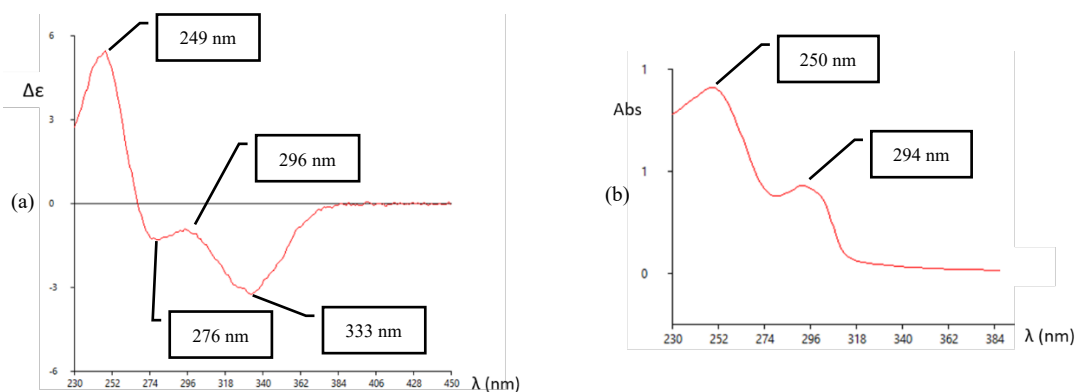

**Figure S4.** Experimental ECD (a) and UV (b) spectra of **1b** recorded in  $\text{CH}_2\text{Cl}_2$  ( $c$  0.2 mg/mL). Data collection parameters: data pitch of 1 nm, scanning speed of 20 nm/min, 5 accumulations, wavelength range was 224–470 nm and cell path length 1 mm. Curve smoothing algorithm used was a 3-wavelength center moving average with 4 iterations.

**Note to the reader:** Number of scans is indicated with the acronym NS. Experiments where non-uniform sampling uses the notation described in C. M. Thiele, W. Bermel, *Journal of Magnetic Resonance*, **2012**, 216:134–43.

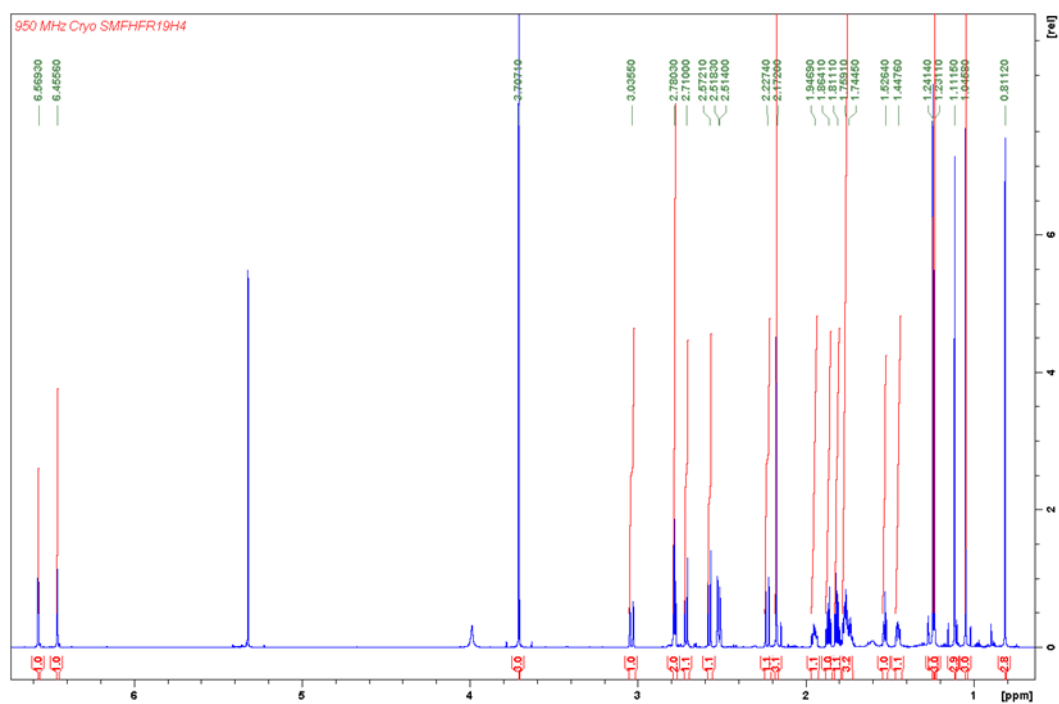

**Figure S5.**  $^1\text{H}$  NMR spectrum of compound **1b** ( $\text{CD}_2\text{Cl}_2$ , NS: 16, 950 MHz).

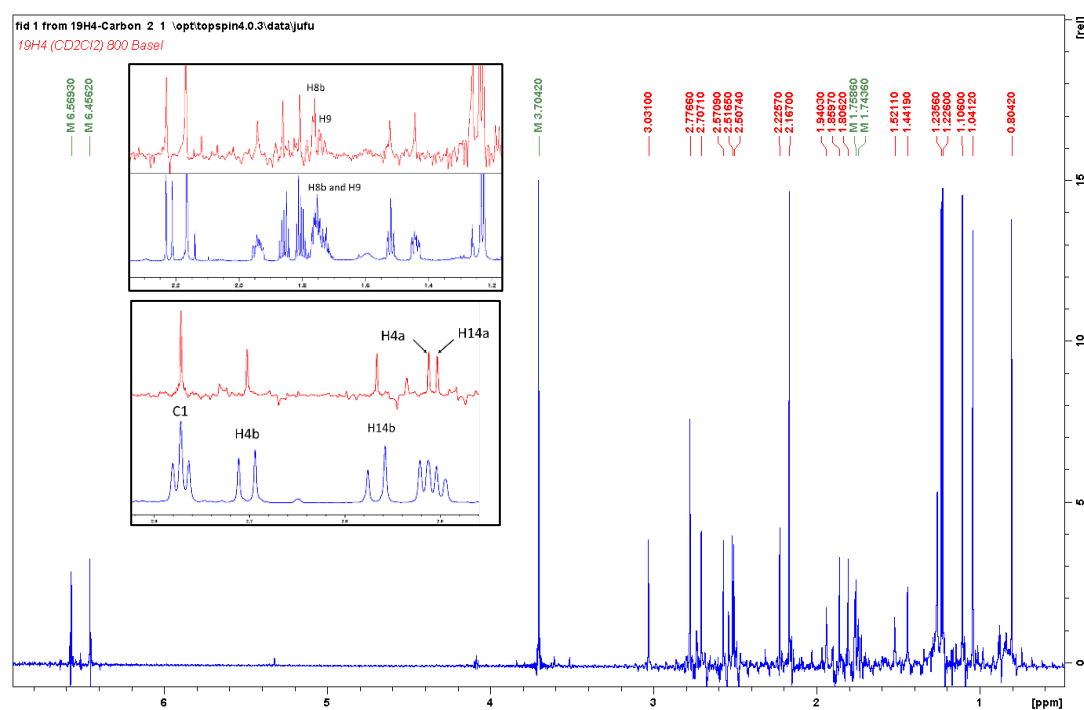

**Figure S6.** Pure shift  $^1\text{H}$  NMR spectrum of compound **1b** ( $\text{CD}_2\text{Cl}_2$ , NS: 32, 800 MHz). Inset shows assignment of H8b, H9, H4b and H14a.

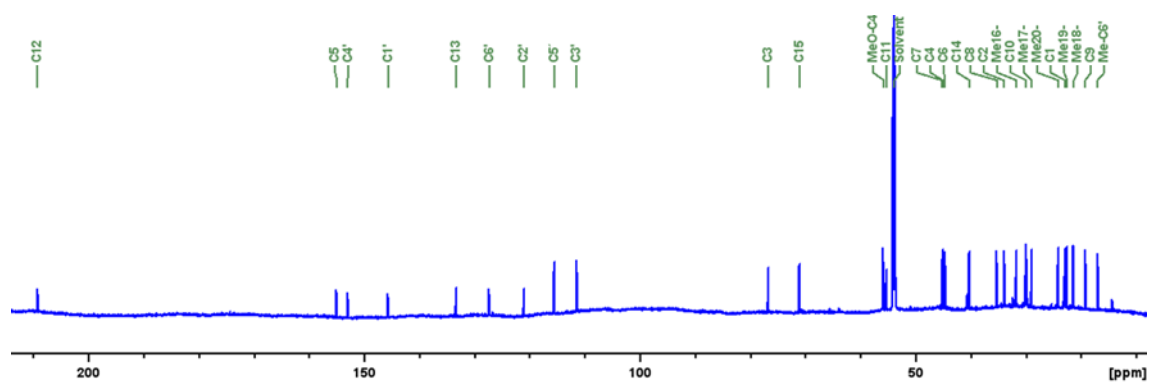

**Figure S7.**  $^{13}\text{C}$   $\{^1\text{H}\}$  NMR spectrum of compound **1b** (*zgdc30*,  $\text{CD}_2\text{Cl}_2$ , NS: 6 K, 200 MHz).

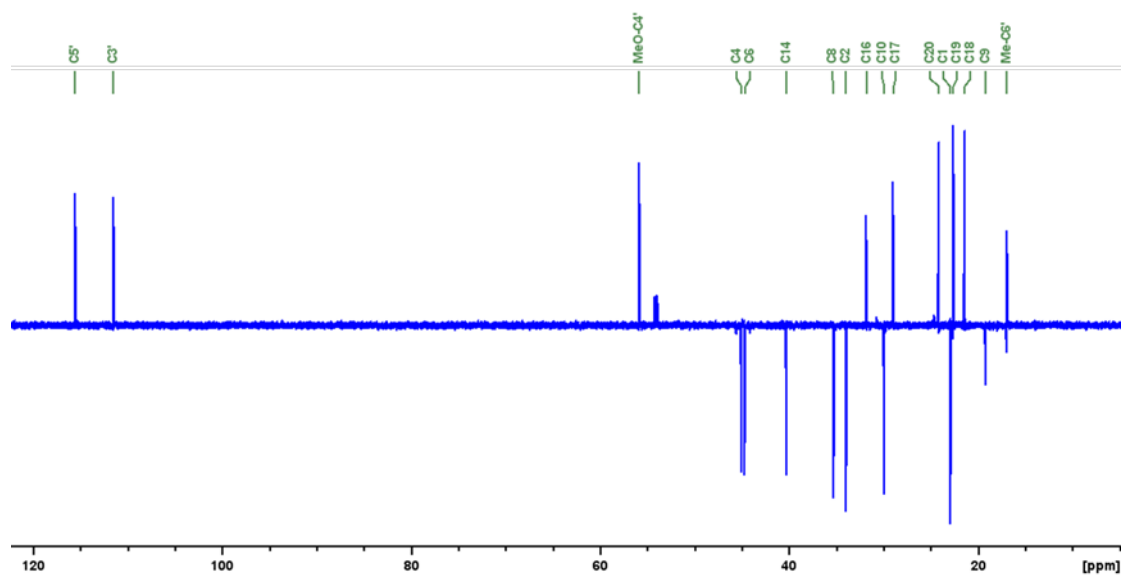

**Figure S8.** DEPT 135 spectrum of compound **1b** (*dept135*,  $\text{CD}_2\text{Cl}_2$ , NS 800, 200 MHz).

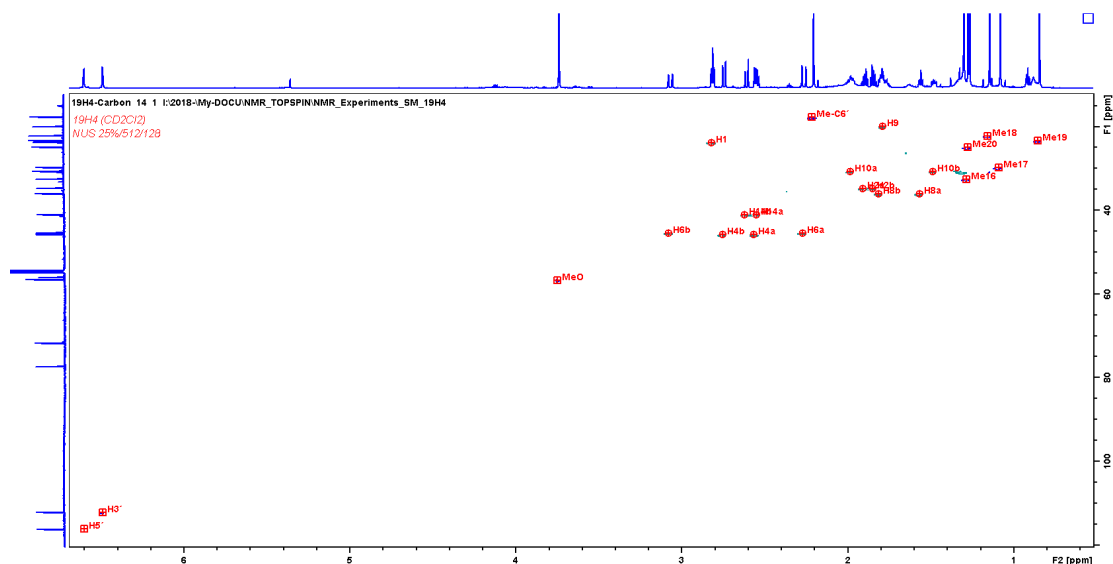

**Figure S9.** Pure shift-HSQC spectrum of compound **1b** ( $\text{CD}_2\text{Cl}_2$ , NS: 32, 800 MHz). Parameters:  $^1J_{\text{CH}} = 130$  Hz. (NUS: 25%/512/128). The spectrum on top is a normal  $^1\text{H}$  spectrum.

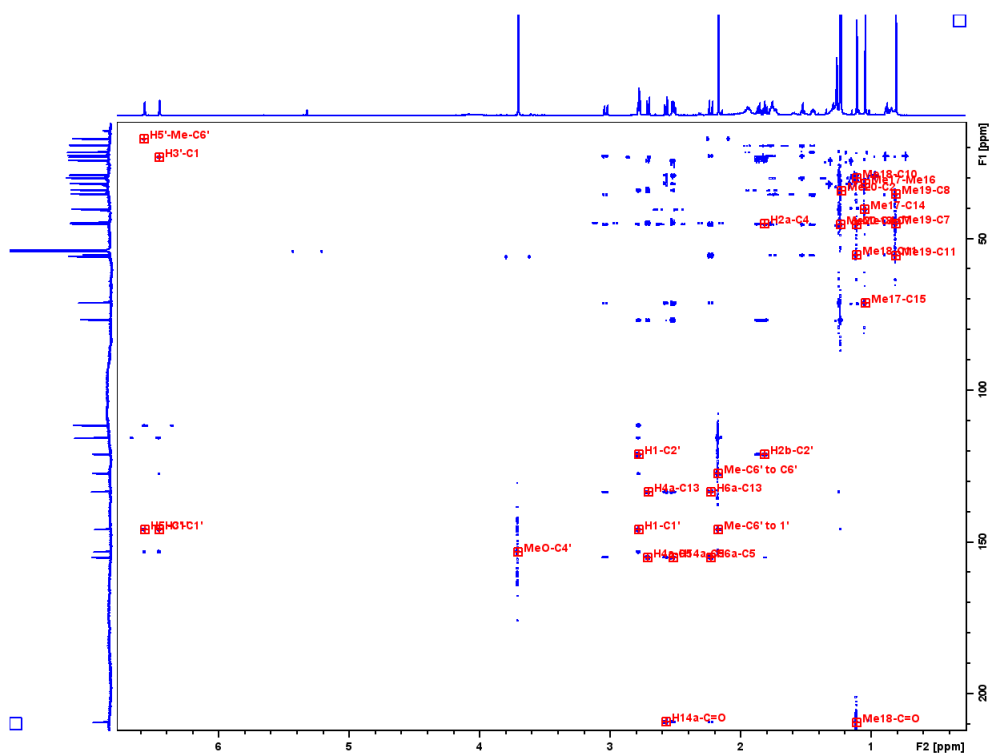

**Figure S10.**  $^{13}\text{C}$ - $^1\text{H}$  HMBC spectrum of compound **1b** (*hmbcetgpnd*,  $\text{CD}_2\text{Cl}_2$ , NS: 16, 800 MHz). Parameters:  $^nJ_{\text{CH}} = 8$  Hz.

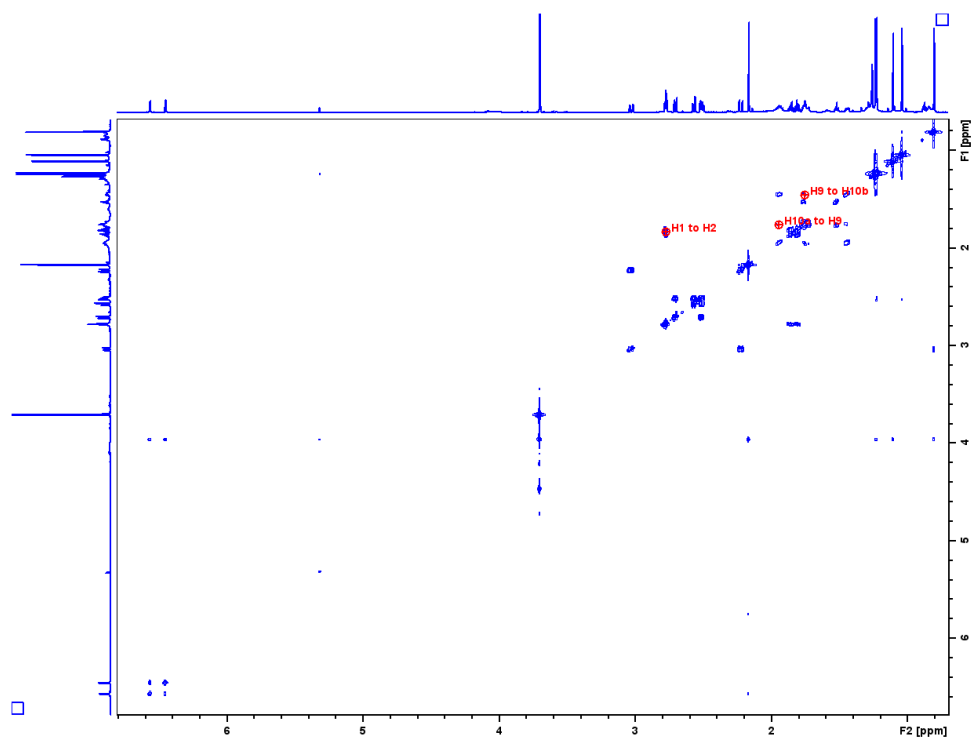

**Figure S11.** <sup>1</sup>H-<sup>1</sup>H-DQFCOSY spectrum of compound **1b** (*cosyqf45*, CD<sub>2</sub>Cl<sub>2</sub>, 800 MHz).



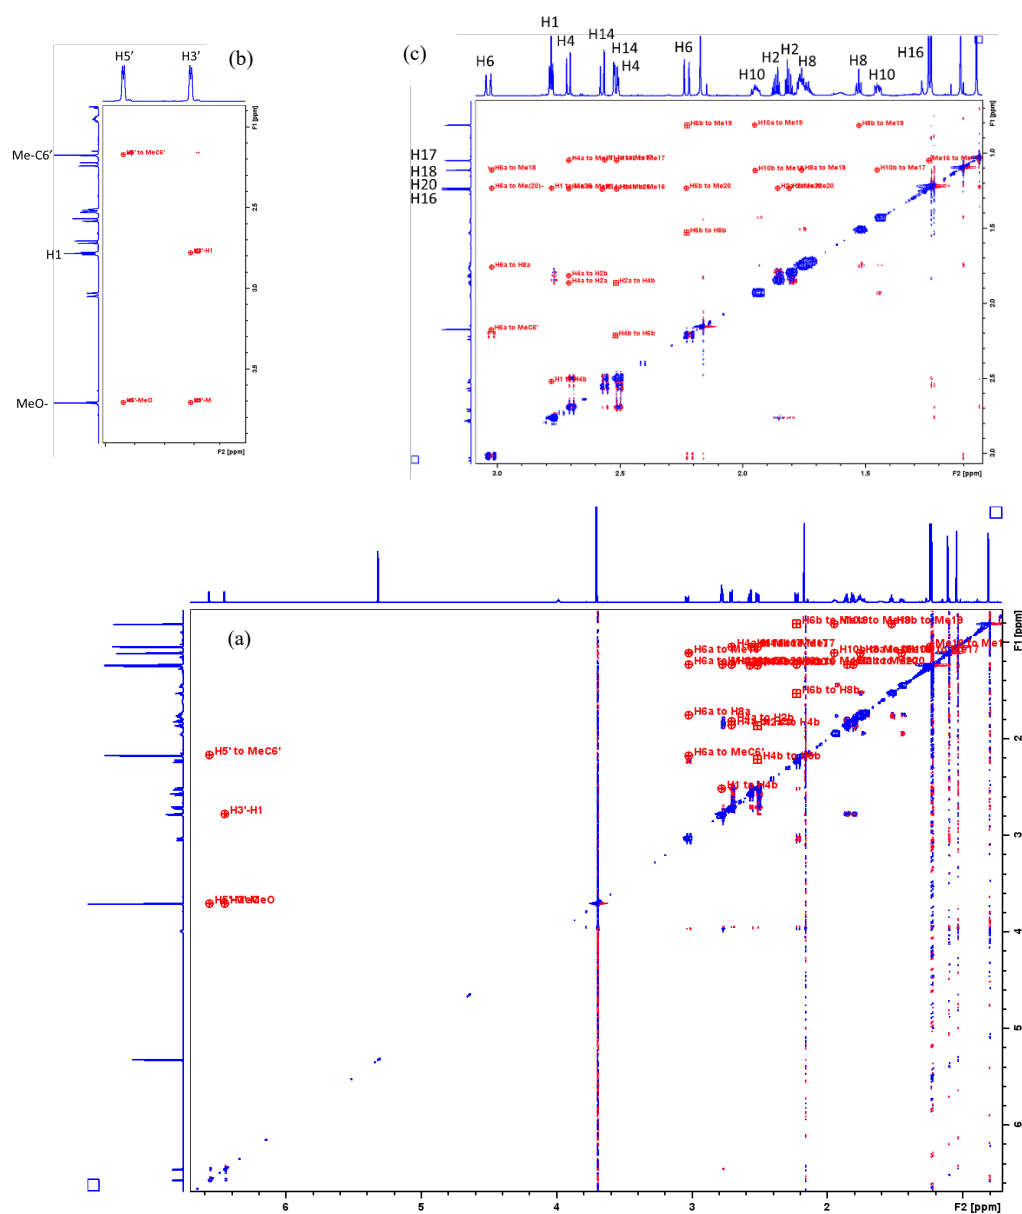

**Figure S12.** NOESY spectrum of compound **1b** (a). Relevant NOESY contacts are shown in insets b) and c). (*Noesyetgp*,  $\text{CD}_2\text{Cl}_2$ , 800 MHz, mixing time = 300 ms).

OH- attached to 15 was assigned by  $^{13}\text{C}$ - $^1\text{H}$  correlation taken from a low temperature HMBC experiment (265 K)

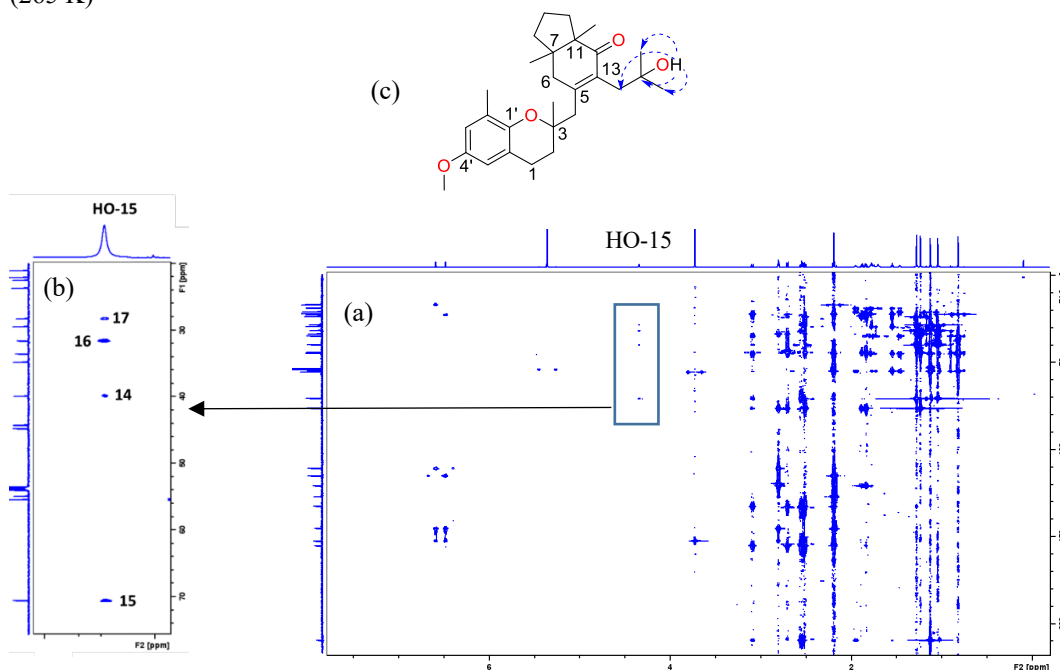

**Figure S13.**  $^{13}\text{C}$ - $^1\text{H}$  HMBC experiment of **1b** (a) recorded at 265 K (*hmbcetgpl3nd*,  $\text{CD}_2\text{Cl}_2$ , NS: 16, 950 MHz). (a) Inset shows several HMBC correlation from OH-15 (b). Correlations of **1b** are indicated by blue dashed lines (c) Parameters:  $^nJ_{\text{CH}} = 6$  Hz. NUS: 20%/800/80

### 3. Benchmarking DFT methods for the calculation of $^1J_{CC}$ , $^2J_{CH}$ , $^3J_{CH}$

Molecular model of santonin and strychnine used were proposed before by NMR anisotropy and NOE analysis respectively. All the couplings were measured from either IPAP-HSQMBC or HSQC-HECADE experiments. This study focuses on comparing how well density functional theory (DFT) methods employing small basis sets can estimate absolute value of  $^{2,3}J_{CH}$ , and  $^3J_{HH}$  in a rigid system.

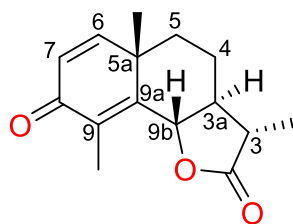

(-)- $\alpha$ -santonin

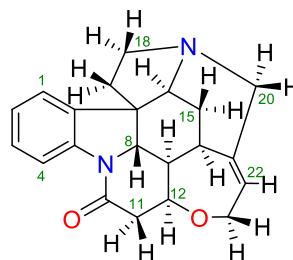

strychnine

Several methods were included for comparison. Altogether, 46 DFT methods were tested using one data set which the  $J$ -coupling have been determined by isotropic NMR methods in DMSO- $d_6$ . The OLYP basis set performed far better than other functional basis set combinations. Due to its short computational demands, it is suitable for most of the common systems.

**Table S1.** Experimental spin-spin carbon proton long range couplings ( $^{2,3}J_{CH}$ ) of minus- $\alpha$ -santonin and strychnine in isotropic solution (DMSO- $d_6$ ) <sup>Y</sup>

| (-)- $\alpha$ -Santonin |      |                      | (-)- $\alpha$ -Santonin |       |                      |
|-------------------------|------|----------------------|-------------------------|-------|----------------------|
| Correlation             |      | $^2J_{CH}$ Exp. (Hz) | Correlation             |       | $^3J_{CH}$ Exp. (Hz) |
| C8                      | H7*  | 0.8                  | C9a                     | H3a   | 2.4*                 |
| C5a                     | H6*  | 3.0                  | C9                      | H7    | 3.5*                 |
| C9a                     | H9b  | 3.5                  | C5a                     | H7    | 7.9*                 |
| C5a                     | H5a* | 3.5                  | C8                      | H6    | 9.9*                 |
| C5a                     | H5b* | 3.5                  | C9a                     | H6    | 6.6*                 |
| C5a                     | Me*  | 3.7                  | C9                      | H9b   | 4.3*                 |
| C9                      | Me*  | 6.4                  | C5a                     | H4b   | 1.6*                 |
| C9b                     | H3a  | -5.7                 | C5a                     | H4a   | 8.5*                 |
| C3a                     | H9b  | -3.3                 | C9a                     | Me-   | 3.2*                 |
| C5                      | H4b  | -4.3                 |                         |       |                      |
| C5                      | H4a  | -3.6                 | C8                      | Me-C9 | 3.7*                 |
| C4                      | H5b  | -3.0                 | C5                      | H6    | 2.9*                 |
| C3a                     | H3   | -4.7                 | C4                      | H9b   | 2.4                  |
| C3                      | H3a  | -2.9                 | C9b                     | H4b   | 2.6                  |
| C2                      | H3   | 7.4                  | C9b                     | H4a   | 11.0                 |
| C3                      | Me   | -4.9                 | C6                      | H5a   | 3.0*                 |
| Me                      | H3   | -4.3                 | C3a                     | H5a   | 1.9                  |
|                         |      |                      | C9b                     | H3    | 0.7                  |
|                         |      |                      | C4                      | H3    | 3.7                  |
|                         |      |                      | C6                      | Me-   | 4.7*                 |
|                         |      |                      | C5                      | Me-   | 4.5*                 |
|                         |      |                      | C3a                     | Me-C3 | 4.6*                 |
|                         |      |                      | C3                      | H9b   | 2.2*                 |
|                         |      |                      | C3                      | H4b   | 2.0                  |
|                         |      |                      | MeC3                    | H3a   | 4.1                  |
|                         |      |                      | MeC5a                   | H6    | 2.5*                 |
|                         |      |                      | MeC5a                   | H5a   | 7.8*                 |
|                         |      |                      | MeC5a                   | H5b   | 3.4*                 |

  

| Strychnine |      |                      |
|------------|------|----------------------|
| Atoms      |      | $^2J_{CH}$ Exp. (Hz) |
| C11        | H12* | 2.1                  |
| C8         | H13* | 6.4                  |
| C14        | H13* | 4.9                  |

<sup>Y</sup> Spin-spin couplings were extracted either from HECADE-HSQC or IPAP-HSQMBC spectrum. (\*) Unsigned coupling measured from IPAP-HSQMBC.

**Table S2.** Derived fitting parameters for the spin-spin carbon proton long range couplings ( $^2,^3J_{\text{CH}}$ ) in isotropic solution (DMSO- $d_6$ ). Fitting done over unsingd values

| <i>Level of theory: GIAO: OLYP/DefT2TZV</i>          |              |                                |                           |                                            |
|------------------------------------------------------|--------------|--------------------------------|---------------------------|--------------------------------------------|
| <i>Spin-spin coupling</i>                            | <i>Slope</i> | <i>Coefficient correlation</i> | <i>Standard deviation</i> | <i>Number of Spin-spin coupling fitted</i> |
| $^2J_{\text{CH}}$                                    | 0.846        | 0.967                          | 1.5                       | 20                                         |
| $^3J_{\text{CH}}$                                    | 0.951        | 0.978                          | 2.3                       | 32                                         |
| <i>Level of theory: GIAO: MPW1PW91/6-311+G(2d,p)</i> |              |                                |                           |                                            |
| <i>Spin-spin coupling</i>                            | <i>Slope</i> | <i>Coefficient correlation</i> | <i>Standard deviation</i> | <i>Number of Spin-spin coupling fitted</i> |
| $^2J_{\text{CH}}$                                    | 0.9834       | 0.992                          | 1.4                       | 20                                         |
| $^3J_{\text{CH}}$                                    | 0.9139       | 0.993                          | 2.4                       | 32                                         |

Chemical shielding tensors and spin-spin coupling for  $^{13}\text{C}$  RCSA/ $J$ -based analysis was computed at GIAO/MPW1PW91/6-311G+(2d,p) in gas phase. Spin-spin coupling for the  $J$ -based analysis in the bicyclo[4.3.0]nonane moiety were computed with the combination GIAO/OLYP/Def2TZV in gas phase.  $^nJ$ -Couplings correction factor is shown in Table S3.

**Table S3.** Scaling factor correction for  $^nJ_{\text{XH}}$  (X=H, C) computed at MPW1PW91/6-311+G(2d,p) (gas phase) level of theory used in the  $J$ -based analysis of **1b**.

| $^3J_{\text{CH}}$ | $^2J_{\text{CH}}$ | $^3J_{\text{HH}}$ |
|-------------------|-------------------|-------------------|
| 0.9139            | 0.9834            | 0.8824            |

**Note:** Spin-spin coupling was computed to such a low level of theory (OLYP/Def2TZV) due number of molecular models considered in the ensemble and the relatively cheap computational cost of it. Whenever possible, we recommend considering other options as GIAO/MPW1PW91/6-311G+(2d,p).

*To the reader:* Spin-spin coupling were computed as “Total nuclear spin-spin coupling” considering the four terms contributing to the Nuclear Spin-spin Coupling Constants: the paramagnetic and diamagnetic orbital terms, and the electron-spin dependent Fermi-contact and spin-dipole term.

## 4. *J*-Based Configurational Analysis and NOE Measurements

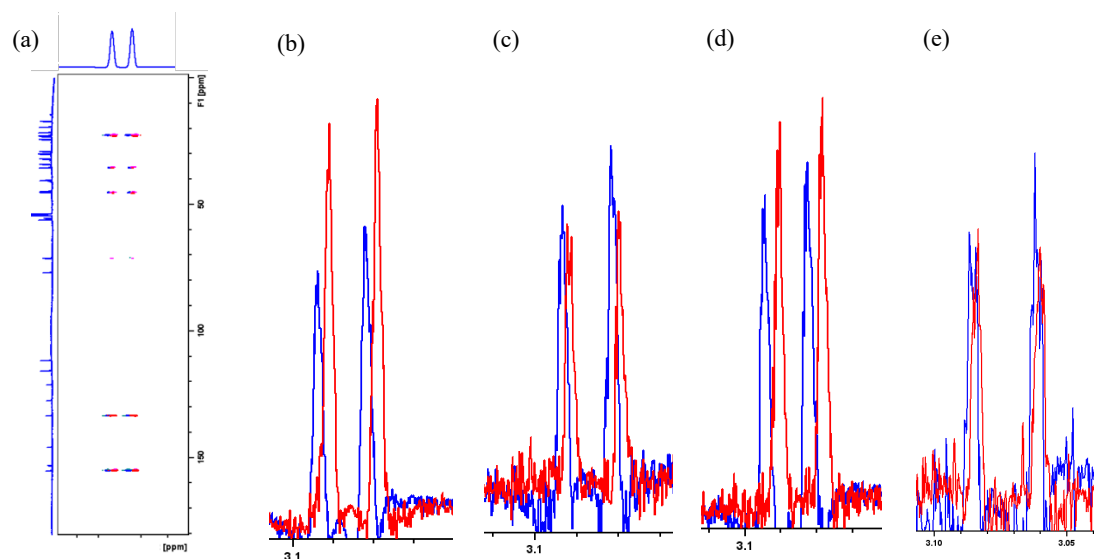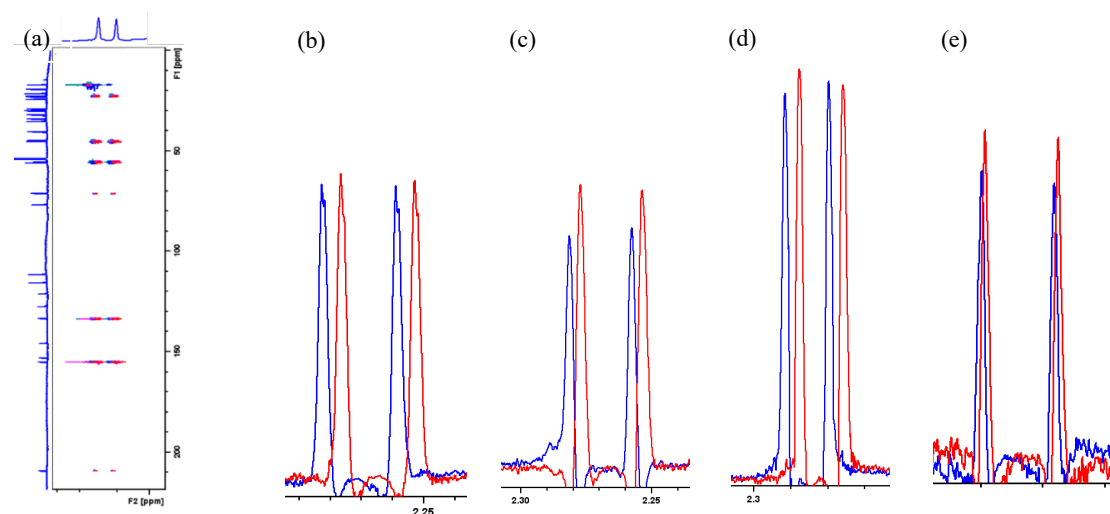

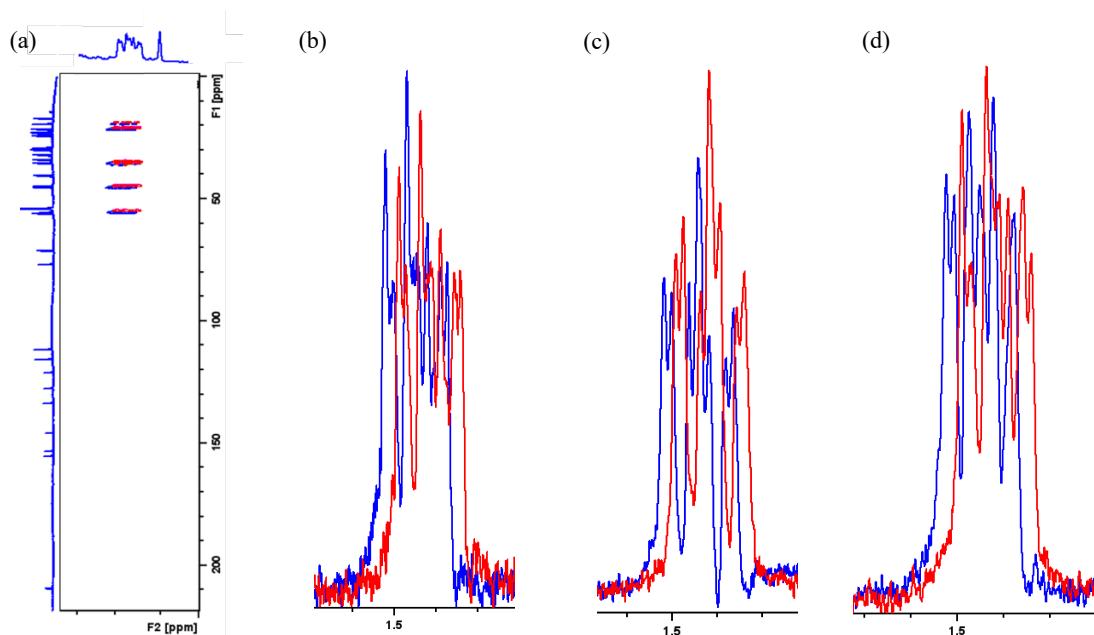

**Figure S16.** 2D HSQMBC-IPAP spectrum (optimized to 6 Hz) after selective inversion of **H10b** (1.441 ppm) proton of meroditerpene **1b** (a). IPAP-HSQMBC  $\alpha$  (blue) and  $\beta$  (red) multiplets of the cross-peaks involving C18 (5.2 Hz), C8 (4.1 Hz) and C7 (5.5 Hz) (b-d). Measurement of  $^3J_{CH}$  values were performed by analysis of IPAP multiplet patterns. NS: 32. NUS: 23%/640/73.

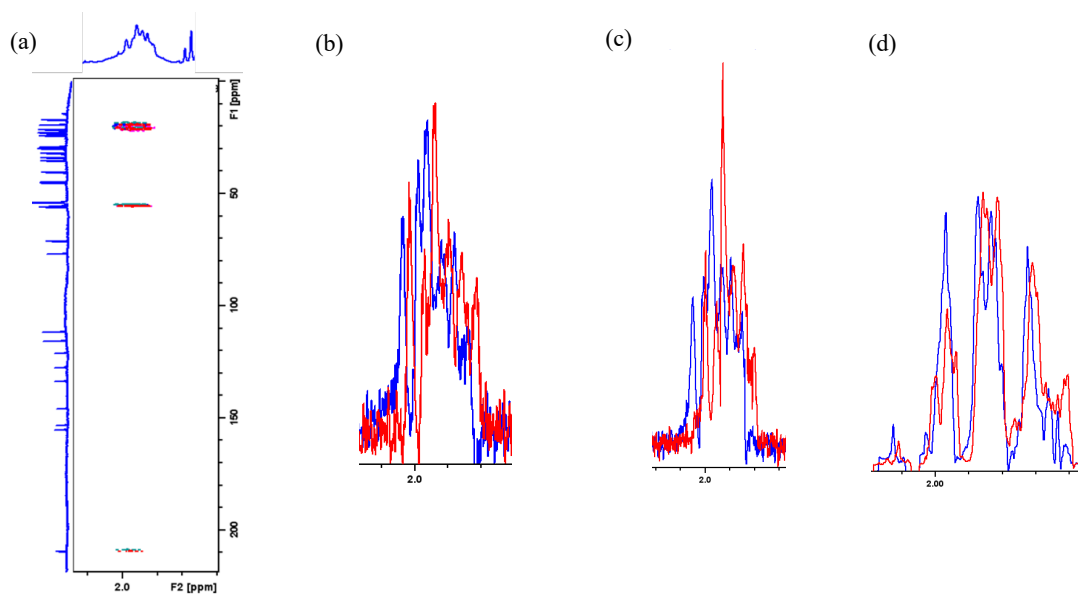

**Figure S17.** 2D HSQMBC-IPAP spectrum (optimized to 6 Hz) after selective inversion of **H10a** (1.944 ppm) proton of meroditerpene **1b** (a). IPAP-HSQMBC  $\alpha$  (blue) and  $\beta$  (red) multiplets of the cross-peaks involving the C12 (3.8 Hz), C18 (8.2 Hz) and C8 (1.0 Hz) (b-c). Measurement of  $^nJ_{CH}$  values were performed by analysis of IPAP multiplet patterns.  $^3J_{C8H10a}$  was extracted from an HSQMBC-IPAP spectrum optimized to 1.5 Hz (d). NS: 32. NUS: 23%/640/73.

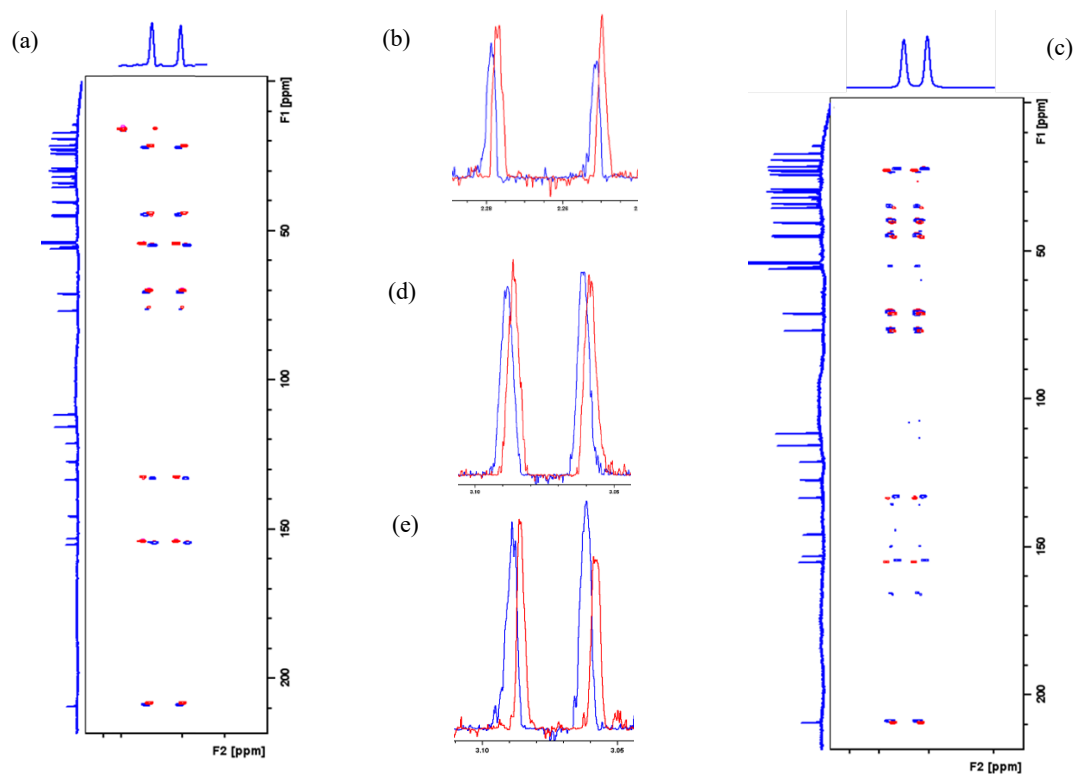

**Figure S18.** 2D HSQMBC-IPAP spectrum (optimized to 2 Hz) after selective inversion of **H6a** (2.237 ppm) proton of meroditerpene **1b** (a). IPAP-HSQMBC  $\alpha$  (blue) and  $\beta$  (red) multiplets of the cross-peaks involving C3 (1.1 Hz) (b). 2D HSQMBC-IPAP spectrum (optimized to 2 Hz) after selective inversion of **H6b** (3.028 ppm) proton of meroditerpene **1b** (c). IPAP-HSQMBC  $\alpha$  (blue) and  $\beta$  (red) multiplets of the cross-peaks involving C3 (1.7 Hz) and C11 (1.8 Hz) (d,e). Measurement of  $^nJ_{CH}$  values were performed by analysis of IPAP multiplet patterns ( $CD_2Cl_2$ , 700MHz). NS: 104. NUS parameters: 13%/512/17.



**Table S4.**  $^{13}\text{C}$ - $^1\text{H}$  coupling constants for compound **1b**.

| IPAP-HSQMBC<br>Correlation | Spin-Spin Coupling<br>value (Hz) | IPAP-HSQMBC<br>Correlation | Spin-Spin Coupling<br>value (Hz) |
|----------------------------|----------------------------------|----------------------------|----------------------------------|
| $^3J_{\text{C8H6b}}$       | 2.4                              | $^3J_{\text{C2H4b}}$       | 2.1                              |
| $^3J_{\text{C19H6a}}$      | 3.4                              | $^3J_{\text{C20H4b}}$      | 0.2                              |
| $^3J_{\text{C11H6a}}$      | 6.2                              | $^2J_{\text{C3H4b}}$       | 1.9                              |
| $^3J_{\text{C19H6b}}$      | 6.4                              | $^2J_{\text{C5H4b}}$       | 5.0                              |
| $^3J_{\text{C18H10b}}$     | 5.2                              | $^3J_{\text{C13H4b}}$      | 4.2                              |
| $^3J_{\text{C7H10b}}$      | 5.5                              | $^3J_{\text{C6H4b}}$       | 6.0                              |
| $^3J_{\text{C8H10b}}$      | 4.1                              | $^2J_{\text{C5H4a}}$       | 4.9                              |
| $^3J_{\text{C12H10a}}$     | 3.8                              | $^3J_{\text{C2H4a}}$       | 2.0                              |
| $^3J_{\text{C18H10a}}$     | 8.2                              | $^3J_{\text{C20H4a}}$      | 5.6                              |
| $^3J_{\text{C4H2b}}$       | 3.6                              | $^3J_{\text{C13H4a}}$      | 5.6                              |
| $^3J_{\text{C2'H2b}}$      | 4.4                              | $^3J_{\text{C6H4a}}$       | 3.6                              |
| $^3J_{\text{C20H2b}}$      | 1.8                              | $^2J_{\text{C3H4a}}$       | 6.7                              |
| $^2J_{\text{C1H2b}}$       | -3.8 <sup>2</sup>                | $^3J_{\text{C12H14b}}$     | 5.3                              |
| $^2J_{\text{C3H2b}}$       | 2.8                              | $^3J_{\text{C5H14b}}$      | 3.9                              |
| $^3J_{\text{C4H2a}}$       | 1.7                              | $^2J_{\text{C13H14b}}$     | 4.6                              |
| $^3J_{\text{C2'H2a}}$      | 4.1                              | $^3J_{\text{C16H14b}}$     | 1.3                              |
| $^3J_{\text{C20H2a}}$      | 3.6                              | $^3J_{\text{C17H14b}}$     | 2.4                              |
| $^2J_{\text{C1H2a}}$       | -3.7 <sup>2</sup>                | $^2J_{\text{C15H14b}}$     | 4.1                              |
| $^2J_{\text{C3H2a}}$       | 3.4                              | $^3J_{\text{C16H14a}}$     | 1.8                              |
| $^4J_{\text{C3H6a}}$       | 1.1                              | $^3J_{\text{C12H14a}}$     | 3.7                              |
| $^4J_{\text{C3H6b}}$       | 1.7                              | $^3J_{\text{C5H14a}}$      | 5.2                              |
| $^3J_{\text{C13H6b}}$      | 6.0                              | $^2J_{\text{C15H4a}}$      | 5.9                              |
| $^5J_{\text{C15H6b}}$      | 1.8                              | $^3J_{\text{C17H14a}}$     | 4.5                              |
| $^3J_{\text{C13H6a}}$      | 5.2                              |                            |                                  |
| $^5J_{\text{C15H6a}}$      | 1.4                              |                            |                                  |
| $^3J_{\text{C3H1}}$        | 4.4 <sup>1</sup>                 |                            |                                  |
| $^3J_{\text{C8H6a}}$       | NR                               |                            |                                  |
| $^3J_{\text{C11H6b}}$      | 1.8                              |                            |                                  |
| $^3J_{\text{C7H10a}}$      | NR                               |                            |                                  |
| $^3J_{\text{C8H10a}}$      | 1.0                              |                            |                                  |
| $^3J_{\text{C12H10b}}$     | NR                               |                            |                                  |

NR not readable

(1) Measured from a  $J$ -HMBC experiment.

(2) Sign determined from a HSQC-HECADE experiment, which does not work for couplings to quaternary carbons.

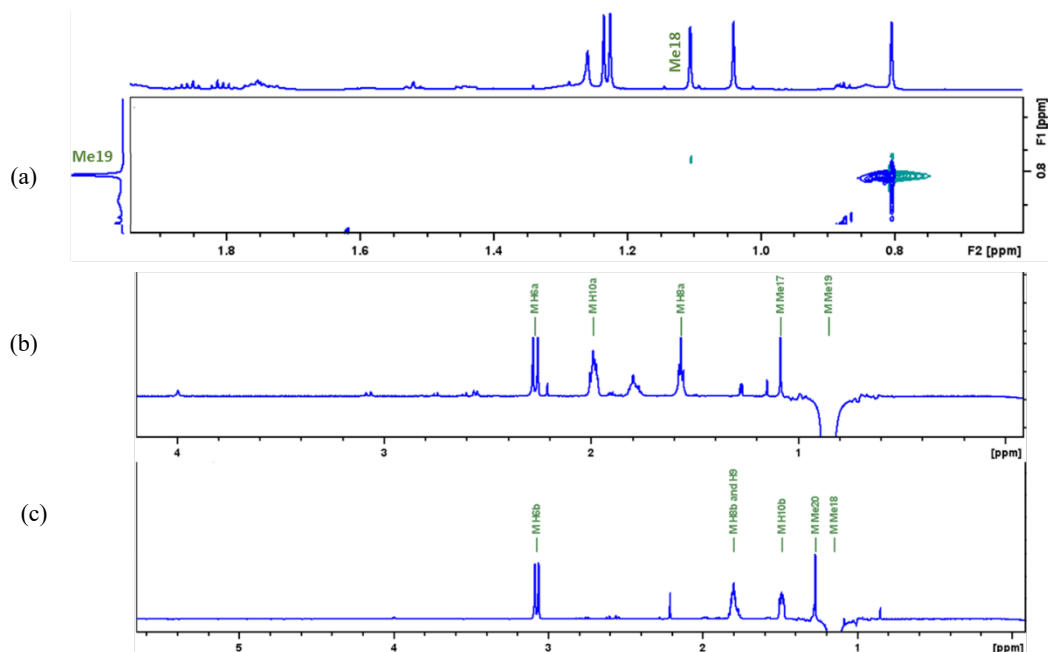

**Figure S19.** Detail of the 2D NOESY spectra of **1b** (a), selective NOE irradiation of H19 (b) and selective irradiation of H18 (c) of compound **1b**. (CD<sub>2</sub>Cl<sub>2</sub>, NS: 320, 800 MHz). Mixing time: 450 ms.

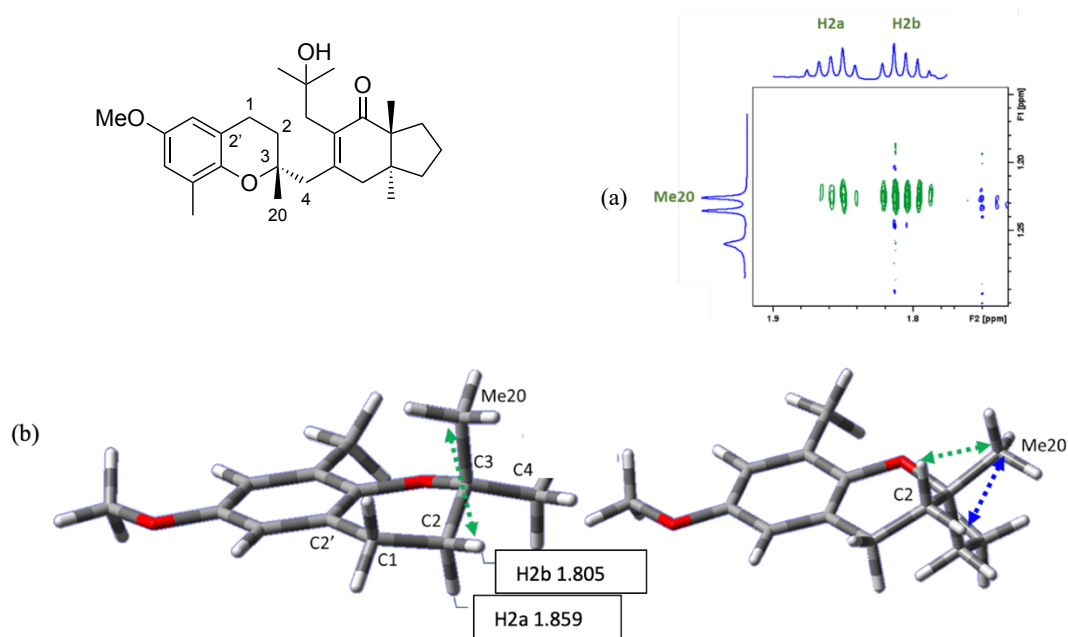

**Figure S20.** Detail of the 2D NOESY spectrum of **1b** (a). Observed NOESY contacts between H2 protons and H20, subjecting the existence of 2 conformations in the chromane fragment; strong NOE contact is indicated with a green dashed arrow, while weak NOE contact is indicating with a blue dashed arrow (b). In the conformation on the left H2a is far from H20 while in conformation on the right both protons have a similar distance to H20.

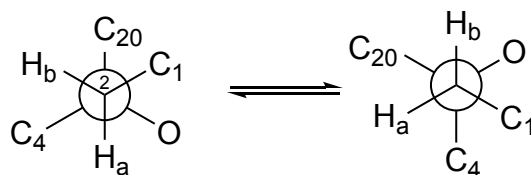

| Atoms          | <i>P</i> -helicity           | <i>M</i> -helicity                               |                                                  |
|----------------|------------------------------|--------------------------------------------------|--------------------------------------------------|
|                | Spin-Spin coupling Exp. (Hz) | Spin-Spin coupling Calc. <i>P</i> -helicity (Hz) | Spin-Spin coupling Calc. <i>M</i> -helicity (Hz) |
| $^3J_{C4H2b}$  | 3.6                          | 1.2                                              | 5.8                                              |
| $^3J_{C2'H2b}$ | 4.4                          | 7.2                                              | 1.0                                              |
| $^3J_{C20H2b}$ | 1.8                          | 1.2                                              | 3.8                                              |
| $^2J_{C1H2b}$  | -3.8                         | -3.4                                             | -3.3                                             |
| $^2J_{C3H2b}$  | 2.8                          | -1.0                                             | -5.5                                             |
| $^3J_{C4H2a}$  | 1.7                          | 3.8                                              | 1.4                                              |
| $^3J_{C2'H2a}$ | 4.1                          | 1.0                                              | 7.2                                              |
| $^3J_{C20H2a}$ | 3.6                          | 5.7                                              | 1.0                                              |
| $^2J_{C1H2a}$  | -3.7                         | -3.3                                             | -3.3                                             |
| $^2J_{C3H2a}$  | 3.4                          | -5.5                                             | -1.0                                             |

Computed at OLYP/Def2TZV/in gas phase DFT level. Experimental couplings were determined as absolute values.  $^2J_{C1H2}$  sign was determined from an HSQC-HECADE experiment.

**Figure S21.** Equilibrium of the *P*-helicity (left conformation) and *M*-helicity (right conformation) conformers in the chromane fragment of **1b** and its impact on the *J* coupling value.

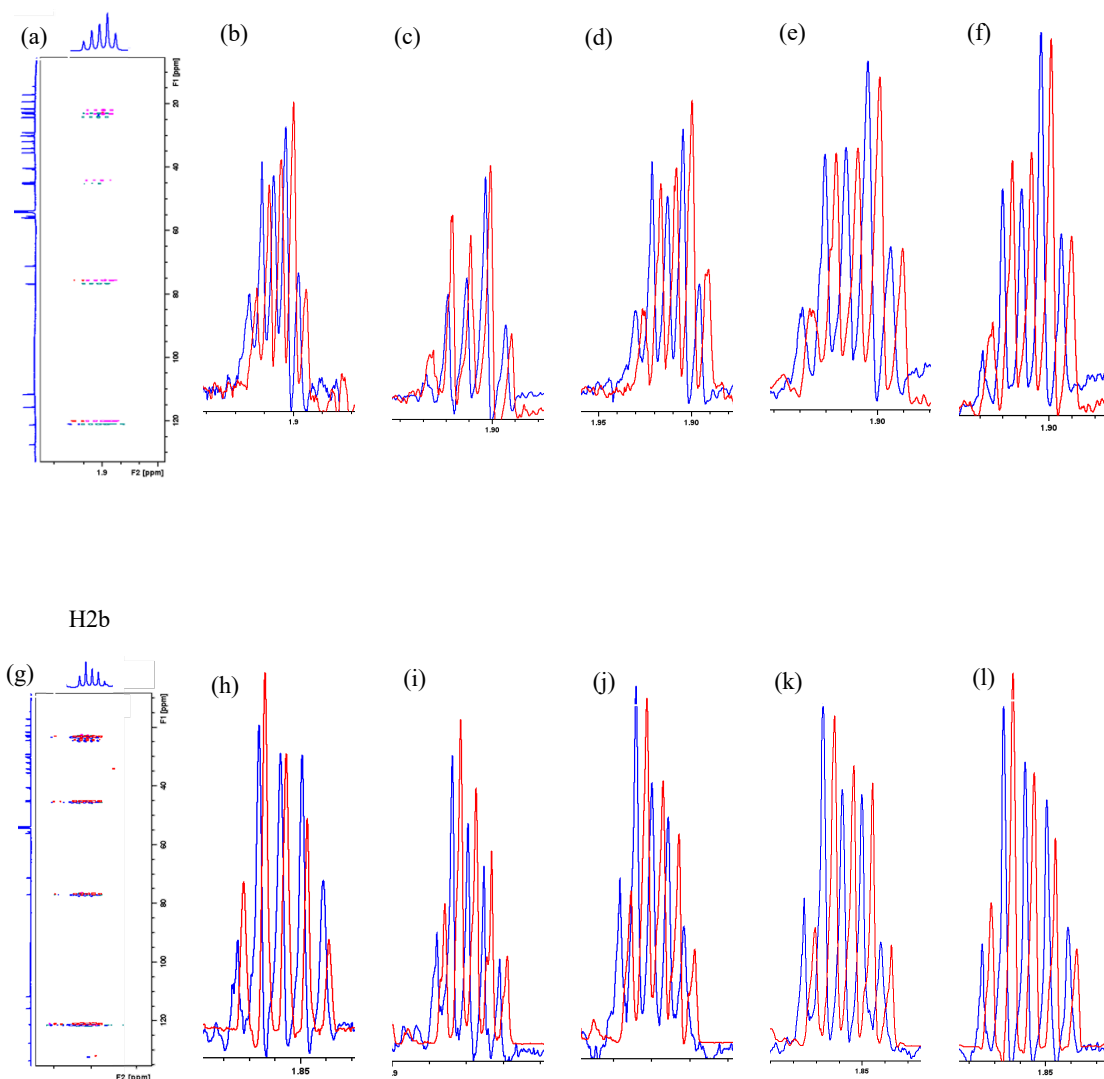

**Figure S22.** 2D HSQMBC-IPAP spectrum of **1b** (optimized to 6 Hz) after selective inversion of **H2a** (1.859 ppm) proton of meroditerpene **1** (a). IPAP-HSQMBC  $\alpha$  (blue) and  $\beta$  (red) multiplets of the cross-peaks involving C20 (3.6 Hz), C4 (1.7 Hz), C2' (4.1 Hz), C1 (-3.7 Hz\*) and C3 (3.4 Hz) to H2a (b-f). 2D HSQMBC-IPAP spectrum (optimized to 6 Hz) after selective inversion of **H2b** (1.805 ppm) proton of meroditerpene **1b** (g). IPAP-HSQMBC  $\alpha$  (blue) and  $\beta$  (red) multiplets of the cross-peaks involving C20 (1.8 Hz), C4 (3.6 Hz), C2' (4.4 Hz), C1 (-3.8 Hz\*) and C3 (2.8 Hz) to H2b (h-l). Measurement of  $^{2,3}J_{CH}$  values were performed by analysis of IPAP multiplet patterns. NS: 48. NUS: 11%/640/35. \*Sign determined from HSQC-HECADE.

## 5. *J*-Based and NOE analysis around the rotatable bounds

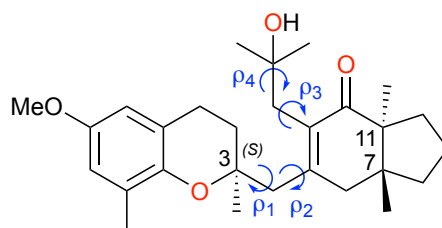

$\rho_1$  [H4b-C4-C3-C20]

$\rho_2$  [H4b-C4-C5-C13]

$\rho_3$  [C12-C13-C14-C15]

$\rho_4$  [C13-C14-C15-C16]

**Figure S23.** Molecular structure of **1b**. Relevant rotatable bounds considered in the PC Model conformational search/*J*-based analysis/quantitative NOE are indicated in blue arrows.

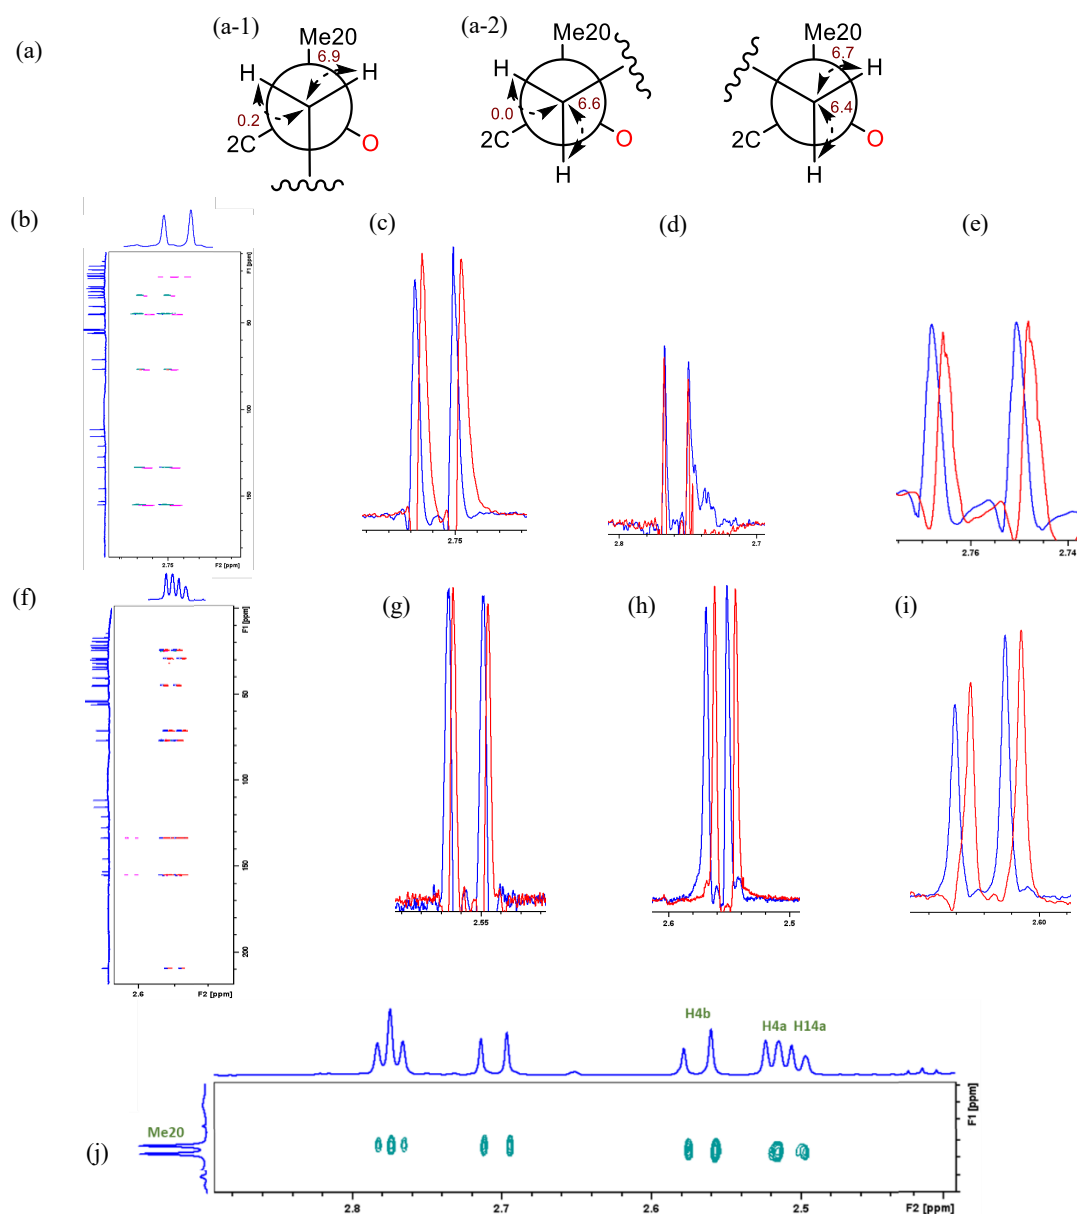

**Figure S24.** Newman projection of rotamers of **1b** around  $\rho_1$  [H4b-C4-C3-C20]; computed  $^2J_{C3H4}$  are indicated in dark red (a). 2D HSQMBC-IPAP spectrum (optimized to 6 Hz) after selective inversion of **H4b** (2.705 ppm) proton of meroditerpene **1b** (b). IPAP-HSQMBC  $\alpha$  (blue) and  $\beta$  (red) multiplets of the cross-peaks involving H4b-C2 (2.1 Hz), H4b-C20 (0.2 Hz) and H4b-C3 (1.9 Hz) (c-e). 2D HSQMBC-IPAP spectrum (optimized to 6 Hz) after selective inversion of **H4a** (2.514 ppm) proton of meroditerpene **1b** (f). IPAP-HSQMBC  $\alpha$  (blue) and  $\beta$  (red) multiplets of the cross-peaks involving H4a-C2 (2.0 Hz), H4a-C20 (5.6 Hz) and H4a-C3 (6.7 Hz) (g-i). Measurement of  $^{2,3}J_{CH}$  values were performed by analysis of IPAP multiplet patterns. Detail of 2D NOESY spectrum showing the NOE contact between H4b and H20, and between H14a and H20 (j). NS: 72. NUS: 18%/640/57.  $^nJ_{CH}$  were computed at GIAO/OLYP/Def2TZV (gas phase) level.

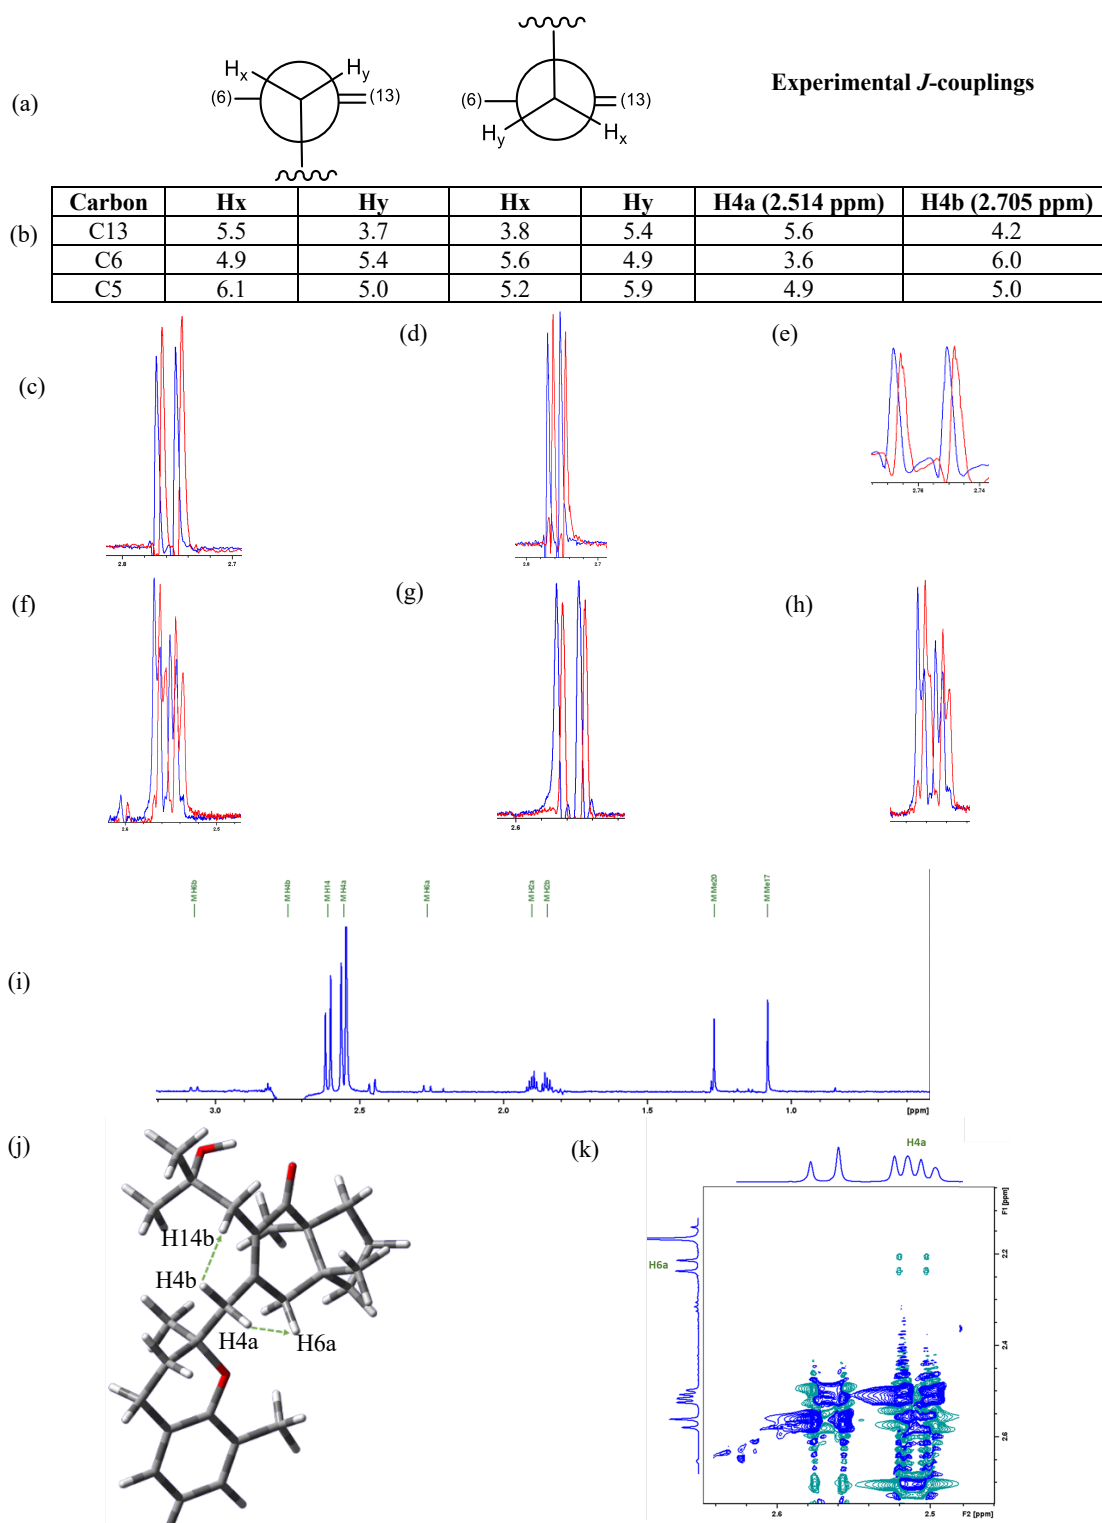

**Figure S25.** Newman projection of rotamers around of **1b** p2 [H4b-C4-C5-C13] (a). Computed  $J$ -couplings of possible rotamers around p2 (level of theory GIAO/OLYP/Def2TZV) and experimental  $J$ -coupling of **1b** (b). IPAP-HSQMBC  $\alpha$  (blue) and  $\beta$  (red) multiplets of the cross-peaks involving **H4b** (2.705 ppm) to C13 (4.2 Hz), C6 (6.0 Hz) and C5 (5.0 Hz); and multiplets of the cross-peaks involving **H4a** (2.514 ppm) to C13 (5.6 Hz), C6 (3.6 Hz) and C5 (4.9 Hz). Measurement of  $^{2,3}J_{CH}$  values were performed, as before, by analysis of IPAP multiplet patterns. (c-h). Selective 1D-NOESY spectrum of H4b showing the NOE contact between H14b (2.570 ppm), H2a, H2b, H20 and H17 (i). 3D model of 3S\*,7R\*,11S\* showing NOE contact between H4b and H14b and between H4a and H6a (j). Detail of 2D NOESY spectrum of meroditerpene **1b** showing the interaction between H4a and H6a (k).

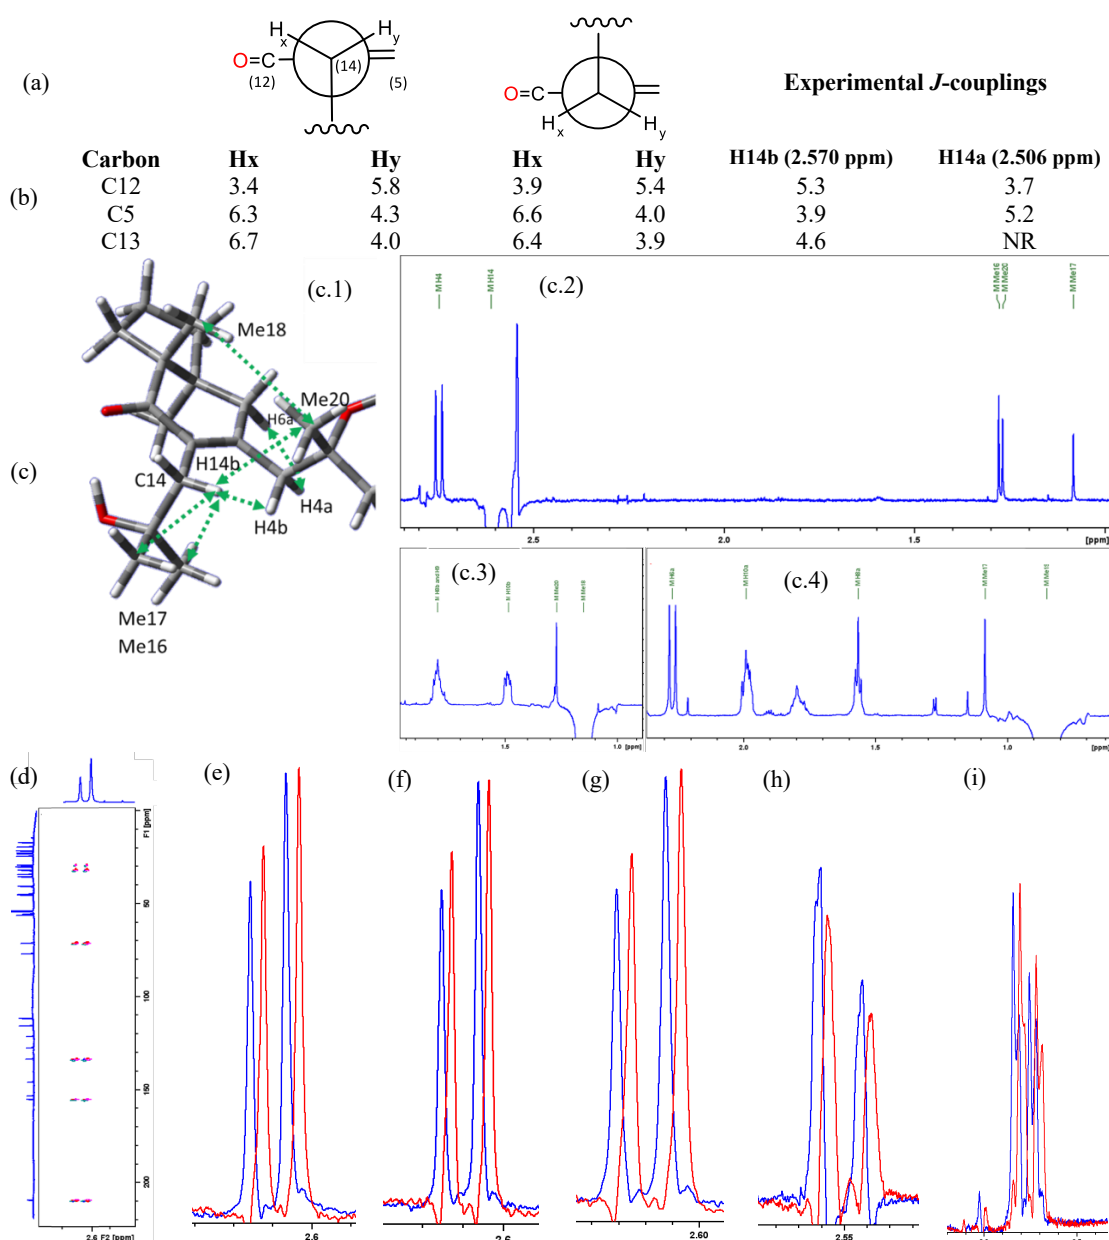

**Figure S26.** Rotamer fragment around  $\rho_3$  [C12-C13-C14-C15] of meroditerpene **1b** (a). Relevant experimental and computed (level of theory GIAO/OLYP/Def2TZV)  $^{2,3}J_{CH}$  around  $\rho_3$  (b). Molecular model of compound **1b**, showing NOE (indicated by a green dashed arrow) contacts between H14b and H4b, H20, H16 and H17, between H4a and H6a, and finally between H20 and H18 (c.1). Selective 1D NOESY spectrum of H14b showing the NOE contact between H4b and H16, H17, and H20 (c.2). Selective 1D NOESY spectrum of H18 showing the NOE contact with H20 (c.3). Selective 1D NOESY spectrum of H19 showing the NOE contact with H6a, H10a, H8a, and H17 (c.4). 2D HSQMBC-IPAP spectrum (optimized to 6 Hz) after selective inversion of **H14b** (2.570 ppm) proton of compound **1b** (d). IPAP-HSQMBC  $\alpha$  (blue) and  $\beta$  (red) multiplets of the cross-peaks involving from left to right H14b to C12 (5.3 Hz), H14b to C5 (3.9 Hz), H14b to C13 (4.6 Hz), **H14a** to C12 (3.7 Hz) and finally H14a to C5 (5.2 Hz) (e-i). Measurement of  $^{2,3}J_{CH}$  values were performed by analysis of IPAP multiplet patterns. NR: Not readable



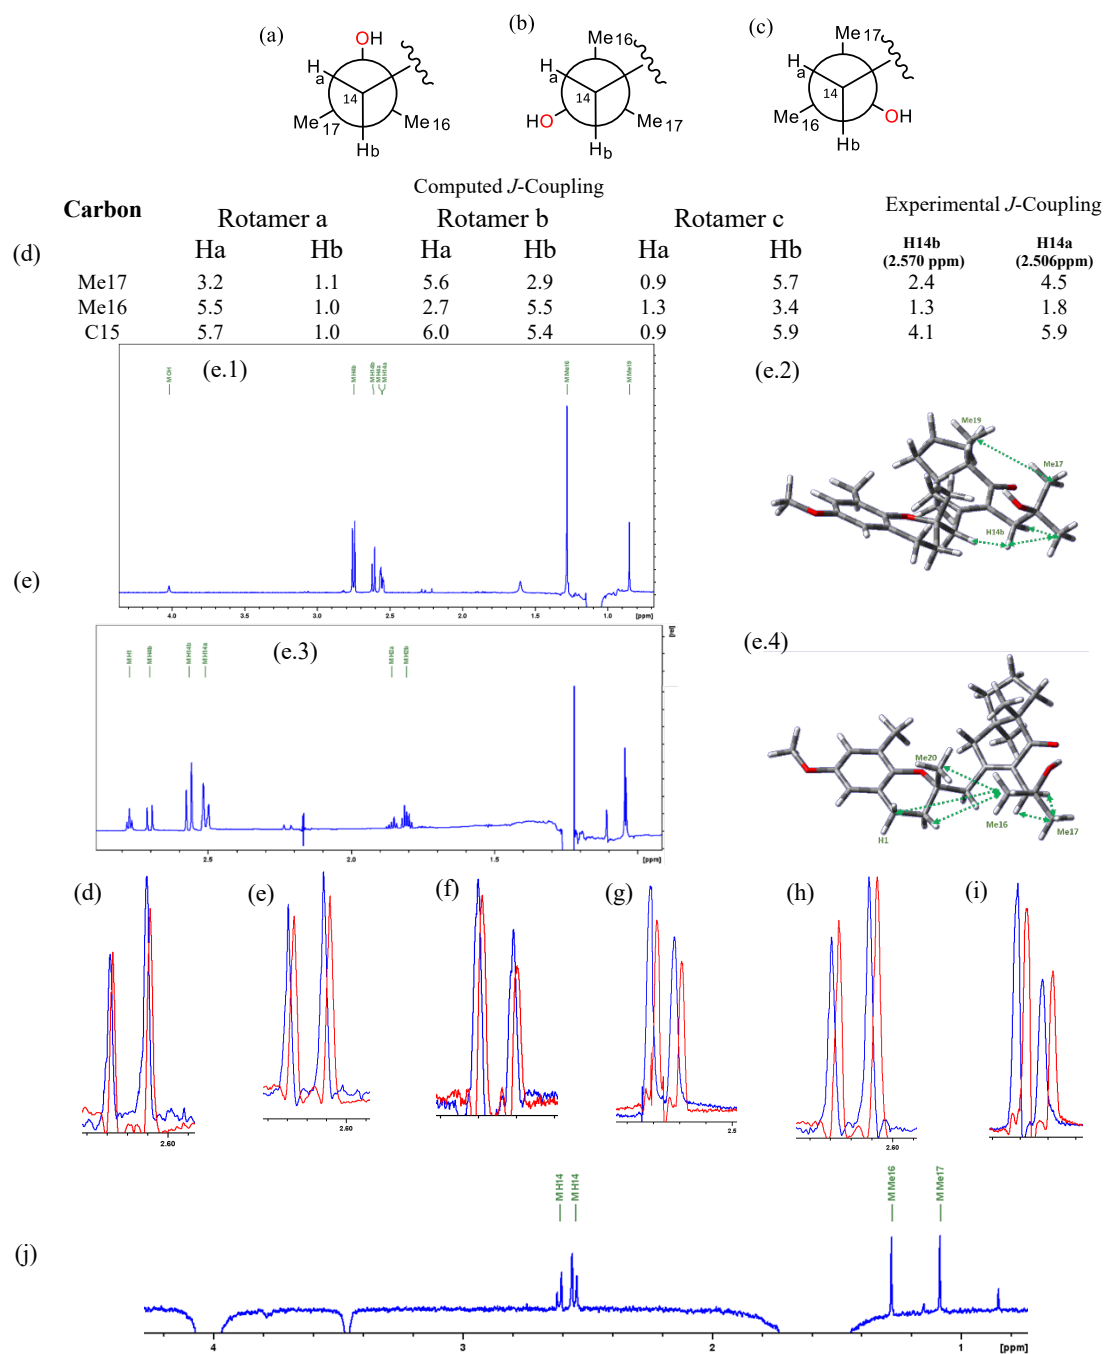

**Figure S27.** Rotamer fragment around p4 [C13-C14-C15-C16] of meroditerpene **1b** (a-c). Experimental and computed (GIAO/OLYP/DEF2TZV)  $^{2,3}J_{CH}$  around p4 (d). Selective 1D NOESY spectrum of H17 showing the NOE contact between H19, H14b, H14a, H4b and H16 (e.1). Correlations are indicated in a molecular model. H17 does not show NOE contact with the chromane system (e.2). Slice from a 2D NOESY spectrum showing NOE contacts from H16 to H1, H2a, H2b, H4b, H14a and H14b (e.3). Correlations are shown in a molecular model. H17 does not show NOE contact with the bicyclo[4.3.0]nonane moiety (e.4). IPAP-HSQMBC  $\alpha$  (blue) and  $\beta$  (red) multiplets of the cross-peaks involving H14b (2.570 ppm) to C16 (1.3 Hz), H14b to C17 (2.4 Hz), H14a (2.506 ppm) to C16 (1.8 Hz), H14a to C17 (4.5 Hz), H14b to C15 (4.1 Hz) and H14a to C15 (5.9 Hz) (d-i). Measurement of  $^{2,3}J_{CH}$  values were performed by analysis of IPAP multiplet patterns. NOE 1D experiment on selective inversion over OH-C15 (j).

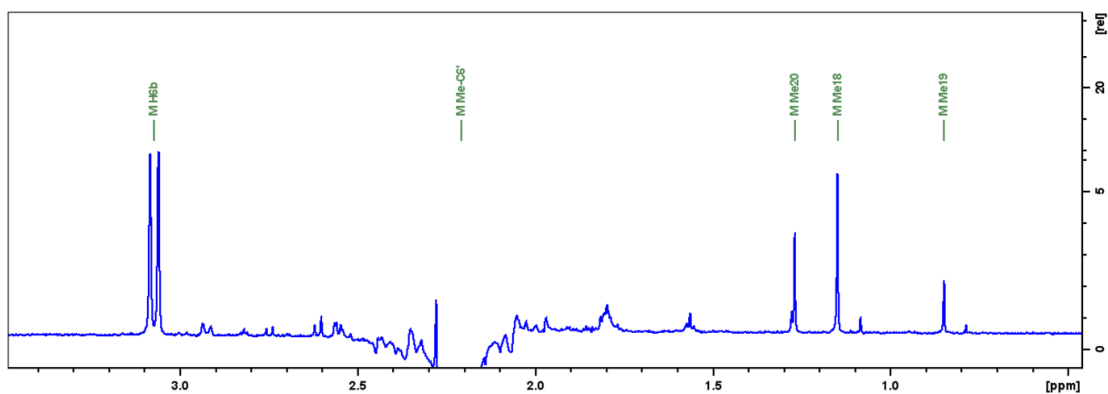

**Figure S28.** NOE 1D experiment of **1b** on selective inversion over Me-C6' showing NOE contacts to H6b, H20, H8 and H19. (CD<sub>2</sub>Cl<sub>2</sub>, NS: 400, 800 MHz). Parameters: Mixing time: 450 ms.

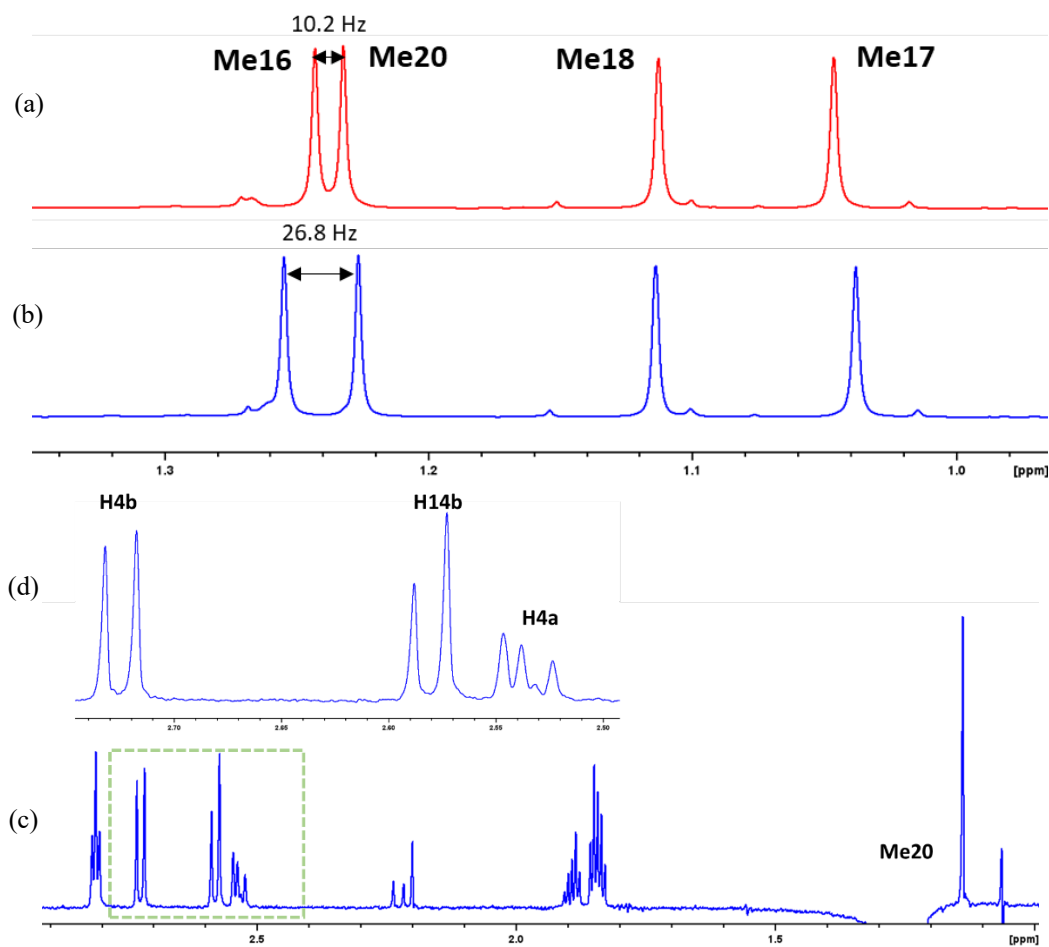

**Figure S29.** <sup>1</sup>H 1D spectrum section of **1b** from 1 ppm until 1.3 ppm at 298.1 K (red line) and at 280 K (blue line) (a,b). Selective NOE experiment over H20 at 280 K (c), showing in the inset (green dashed box) NOE contacts between H20 and H4b, H14b and H4a (d). Both experiments were measured in a 950 MHz Bruker spectrometer (Pulprog: *selnogp*, NS: 40, mixing time: 500 ms).

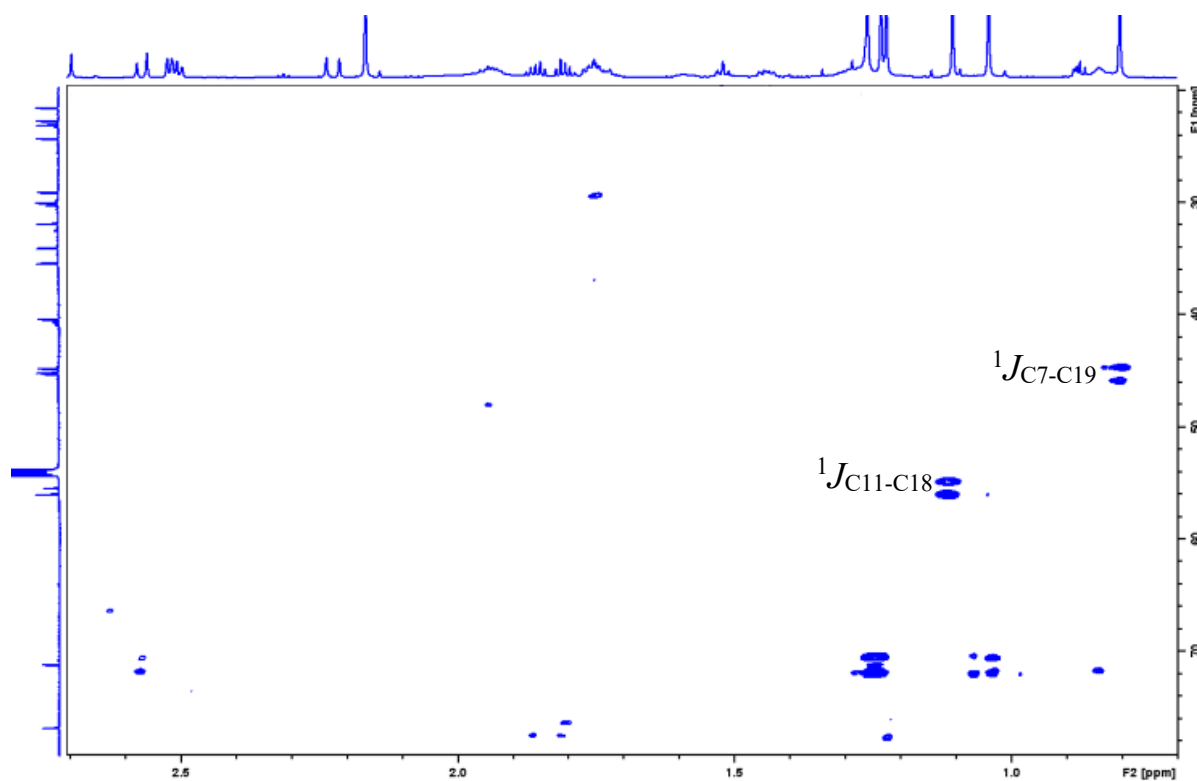

**Figure S30.** *J*-modulated ADEQUATE spectrum of **1b** (*adeq11etgpjcrdsp*) (a). Parameters:  $^1J_{CH}$  = 138 Hz,  $^1J_{CC}$  = 40 Hz, Scaling factor = 8, relaxation delay = 1.5 s, NUS: 35%/512/89. (800 MHz/ $CD_2Cl_2$ )

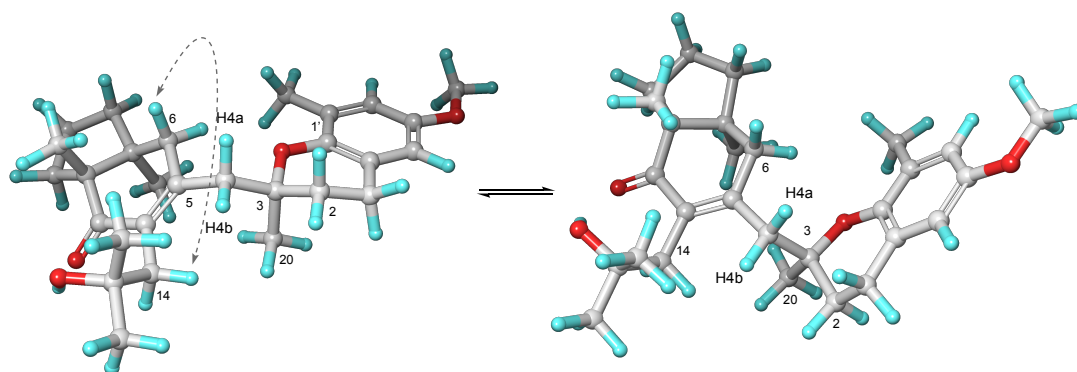

**Figure S31.** Carbon-proton coupling constants from an IPAP-HSQMBC experiment and NOE contacts to relate C3, C7, and C11 stereogenic centers of (**3S\***,**7S\***,**11R\***)-**1b**.  $^2J_{CH}$  sign was measured as absolute value.

Table S5. DP4 (a) and iJ-DP4 (b) Analysis of **1b**. **1**=(3R7S11R)-**1b**, **2**=(3S7S11R)-**1b**.

(a)

| Settings              |          | Type of data (shifts) |      |                     | Default settings  |       |         |   |   |                     |           | Custom settings |         |     |    |                 | Most Likely Isomers |        |      |
|-----------------------|----------|-----------------------|------|---------------------|-------------------|-------|---------|---|---|---------------------|-----------|-----------------|---------|-----|----|-----------------|---------------------|--------|------|
| Default               |          |                       |      |                     | Shielding tensors |       | TMS     |   |   |                     |           |                 |         | TMS |    |                 |                     |        | Rank |
|                       |          |                       |      | H                   | 31.830573         | 0.185 | 14.18   |   |   | H                   | 31.830573 | 0.185           | 14.18   |     |    | 1 <sup>st</sup> | 1                   | 100.00 |      |
|                       |          |                       |      | C                   | 192.29325         | 2.306 | 11.38   |   |   | C                   | 192.29325 | 2.306           | 11.38   |     |    | 2 <sup>nd</sup> | 2                   | 0.00   |      |
|                       |          |                       |      | J                   | -                 | 0.992 | 3.06    |   |   | J                   | -         | 0.992           | 3.06    |     |    | 3 <sup>rd</sup> | -                   | -      |      |
|                       |          |                       |      | Slope scaling J     |                   |       | 0.9509  |   |   | Slope scaling J     |           |                 | 0.9509  |     |    | 4 <sup>th</sup> | -                   | -      |      |
|                       |          |                       |      | Intercept scaling J |                   |       | -0.1405 |   |   | Intercept scaling J |           |                 | -0.1405 |     |    |                 |                     |        |      |
| Isomer N <sup>o</sup> |          |                       |      | 1                   | 2                 | 3     | 4       | 5 | 6 | 7                   | 8         | 9               | 10      | 11  | 12 | 13              | 14                  | 15     |      |
| DP4 (%)               | H        | 100.00                | 0.00 | -                   | -                 | -     | -       | - | - | -                   | -         | -               | -       | -   | -  | -               | -                   |        |      |
|                       | C        | 94.25                 | 5.75 | -                   | -                 | -     | -       | - | - | -                   | -         | -               | -       | -   | -  | -               | -                   |        |      |
|                       | H+C      | 100.00                | 0.00 | -                   | -                 | -     | -       | - | - | -                   | -         | -               | -       | -   | -  | -               | -                   |        |      |
|                       | J        | -                     | -    | -                   | -                 | -     | -       | - | - | -                   | -         | -               | -       | -   | -  | -               | -                   |        |      |
|                       | all data | 100.00                | 0.00 | -                   | -                 | -     | -       | - | - | -                   | -         | -               | -       | -   | -  | -               | -                   |        |      |

(b)

|    | A       | B                     | C                     | D    | E | F                   | G          | H     | I       | J                   | K          | L     | M       | N                   | O               | P      | Q           |
|----|---------|-----------------------|-----------------------|------|---|---------------------|------------|-------|---------|---------------------|------------|-------|---------|---------------------|-----------------|--------|-------------|
| 1  |         | Settings              | Type of data (shifts) |      |   | Default settings    |            |       |         | Custom settings     |            |       |         | Most Likely Isomers |                 |        |             |
| 2  |         | Default               | Shielding tensors     |      |   | TMS                 | $\sigma$   | $\nu$ |         | TMS                 | $\sigma$   | $\nu$ |         |                     | Rank            | Isomer | Probability |
| 3  |         |                       |                       |      |   | H                   | 31.8305727 | 0.185 | 14.18   | H                   | 31.8305727 | 0.185 | 14.18   |                     | 1 <sup>st</sup> | 1      | 100.00      |
| 4  |         |                       |                       |      |   | C                   | 192.29325  | 2.306 | 11.38   | C                   | 192.29325  | 2.306 | 11.38   |                     | 2 <sup>nd</sup> | 2      | 0.00        |
| 5  |         |                       |                       |      |   | J                   | -          | 0.992 | 3.06    | J                   | -          | 0.992 | 3.06    |                     | 3 <sup>rd</sup> | -      | -           |
| 6  |         |                       |                       |      |   | Slope scaling J     |            |       | 0.9509  | Slope scaling J     |            |       | 0.9509  |                     | 4 <sup>th</sup> | -      | -           |
| 7  |         |                       |                       |      |   | Intercept scaling J |            |       | -0.1405 | Intercept scaling J |            |       | -0.1405 |                     |                 |        |             |
| 8  |         | Isomer N <sup>o</sup> | 1                     | 2    | 3 | 4                   | 5          | 6     | 7       | 8                   | 9          | 10    | 11      | 12                  | 13              | 14     | 15          |
| 9  | DP4 (%) | H                     | 100.00                | 0.00 | - | -                   | -          | -     | -       | -                   | -          | -     | -       | -                   | -               | -      | -           |
| 10 |         | C                     | 95.43                 | 4.57 | - | -                   | -          | -     | -       | -                   | -          | -     | -       | -                   | -               | -      | -           |
| 11 |         | H+C                   | 100.00                | 0.00 | - | -                   | -          | -     | -       | -                   | -          | -     | -       | -                   | -               | -      | -           |
| 12 |         | J                     | -                     | -    | - | -                   | -          | -     | -       | -                   | -          | -     | -       | -                   | -               | -      | -           |
| 13 |         | all data              | 100.00                | 0.00 | - | -                   | -          | -     | -       | -                   | -          | -     | -       | -                   | -               | -      | -           |

Note: Next pages are scaled, and unscaled values obtained from the DP4 and iJ-DP4 analysis of **1b**.

UNSCALED <sup>13</sup>C-DP4

| Exp 1b | (3R7S11R)-1b | (3S7S11R)-1b | Δδ (3R7S11R)-1b | Δδ (3S7S11R)-1b |
|--------|--------------|--------------|-----------------|-----------------|
| 115.64 | 108.27       | 108.12       | 7.37            | 7.52            |
| 153.13 | 148.55       | 148.79       | 4.58            | 4.34            |
| 111.58 | 110.45       | 110.15       | 1.13            | 1.43            |
| 121.16 | 123.37       | 124.75       | 2.21            | 3.59            |
| 145.77 | 142.11       | 141.98       | 3.66            | 3.79            |
| 127.43 | 124.99       | 125.33       | 2.44            | 2.10            |
| 23.06  | 26.91        | 27.41        | 3.85            | 4.35            |
| 34.04  | 37.64        | 37.88        | 3.60            | 3.84            |
| 76.80  | 79.00        | 80.32        | 2.20            | 3.52            |
| 40.37  | 41.67        | 41.03        | 1.30            | 0.66            |
| 133.45 | 133.93       | 134.67       | 0.48            | 1.22            |
| 155.10 | 164.21       | 164.45       | 9.11            | 9.35            |
| 45.15  | 44.23        | 45.58        | 0.92            | 0.43            |
| 17.08  | 19.70        | 19.73        | 2.62            | 2.65            |
| 55.97  | 52.74        | 52.76        | 3.23            | 3.21            |
| 71.17  | 69.76        | 70.21        | 1.41            | 0.96            |
| 31.88  | 29.54        | 30.29        | 2.34            | 1.59            |
| 29.08  | 30.49        | 29.68        | 1.41            | 0.60            |
| 209.32 | 206.20       | 206.11       | 3.12            | 3.21            |
| 55.42  | 63.12        | 63.00        | 7.70            | 7.58            |
| 45.15  | 54.24        | 54.28        | 9.09            | 9.13            |
| 44.77  | 48.33        | 47.73        | 3.56            | 2.96            |
| 30.03  | 33.48        | 33.53        | 3.45            | 3.50            |
| 19.32  | 21.02        | 21.09        | 1.70            | 1.77            |
| 35.38  | 36.15        | 36.17        | 0.77            | 0.79            |
| 22.71  | 23.59        | 23.73        | 0.88            | 1.02            |
| 21.51  | 22.22        | 22.40        | 0.71            | 0.89            |
| 24.28  | 27.63        | 29.48        | 3.35            | 5.20            |
|        |              |              | <b>3.15</b>     | <b>3.26</b>     |
|        |              |              | RMSD            | RMSD            |

UNSCALED <sup>1</sup>H-DP4

| Exp 1b | (3R7S11R)-1b | (3S7S11R)-1b | $\Delta\delta$ (3R7S11R)-1b | $\Delta\delta$ (3S7S11R)-1b |
|--------|--------------|--------------|-----------------------------|-----------------------------|
| 6.56   | 6.71         | 6.70         | 0.15                        | 0.14                        |
| 6.45   | 6.56         | 6.56         | 0.11                        | 0.11                        |
| 2.77   | 2.88         | 2.85         | 0.11                        | 0.08                        |
| 2.77   | 2.71         | 2.62         | 0.07                        | 0.16                        |
| 1.86   | 2.06         | 1.92         | 0.20                        | 0.06                        |
| 1.81   | 1.94         | 2.11         | 0.13                        | 0.31                        |
| 2.71   | 2.64         | 2.83         | 0.07                        | 0.12                        |
| 2.57   | 2.62         | 2.53         | 0.05                        | 0.04                        |
| 2.51   | 2.72         | 2.85         | 0.21                        | 0.34                        |
| 2.77   | 2.82         | 2.77         | 0.05                        | 0.01                        |
| 2.17   | 2.32         | 2.33         | 0.16                        | 0.16                        |
| 3.70   | 3.82         | 3.82         | 0.12                        | 0.12                        |
| 1.23   | 1.10         | 1.15         | 0.13                        | 0.07                        |
| 1.04   | 1.20         | 1.17         | 0.16                        | 0.13                        |
| 3.04   | 3.24         | 2.89         | 0.20                        | 0.15                        |
| 2.22   | 2.44         | 2.73         | 0.22                        | 0.51                        |
| 1.94   | 2.29         | 1.67         | 0.35                        | 0.27                        |
| 1.44   | 1.67         | 2.30         | 0.23                        | 0.86                        |
| 1.74   | 1.91         | 1.92         | 0.17                        | 0.17                        |
| 1.74   | 1.90         | 1.88         | 0.16                        | 0.14                        |
| 1.75   | 2.05         | 1.65         | 0.29                        | 0.11                        |
| 1.52   | 1.63         | 1.96         | 0.11                        | 0.44                        |
| 0.80   | 1.02         | 1.13         | 0.21                        | 0.33                        |
| 1.11   | 1.39         | 1.37         | 0.28                        | 0.27                        |
| 1.24   | 1.39         | 1.37         | 0.15                        | 0.13                        |
|        |              |              | <b>0.16</b>                 | <b>0.21</b>                 |
|        |              |              | RMSD                        | RMSD                        |

SCALED  $^{13}\text{C}$ -DP4

| Exp 1b | (3R7S11R)-1b | (3S7S11R)-1b | $\Delta\delta$ (3R7S11R)-1b | $\Delta\delta$ (3S7S11R)-1b |
|--------|--------------|--------------|-----------------------------|-----------------------------|
| 115.64 | 108.23       | 107.82       | 7.41                        | 7.82                        |
| 153.13 | 149.59       | 149.58       | 3.54                        | 3.55                        |
| 111.58 | 110.48       | 109.90       | 1.10                        | 1.68                        |
| 121.16 | 123.73       | 124.90       | 2.57                        | 3.74                        |
| 145.77 | 142.97       | 142.58       | 2.80                        | 3.19                        |
| 127.43 | 125.40       | 125.49       | 2.03                        | 1.94                        |
| 23.06  | 24.71        | 24.96        | 1.65                        | 1.90                        |
| 34.04  | 35.72        | 35.71        | 1.68                        | 1.67                        |
| 76.80  | 78.18        | 79.28        | 1.38                        | 2.48                        |
| 40.37  | 39.86        | 38.94        | 0.51                        | 1.43                        |
| 133.45 | 134.58       | 135.07       | 1.13                        | 1.62                        |
| 155.10 | 165.67       | 165.65       | 10.57                       | 10.55                       |
| 45.15  | 42.50        | 43.62        | 2.65                        | 1.53                        |
| 17.08  | 17.31        | 17.08        | 0.23                        | 0.00                        |
| 55.97  | 51.22        | 50.99        | 4.75                        | 4.98                        |
| 71.17  | 68.70        | 68.90        | 2.47                        | 2.27                        |
| 31.88  | 27.41        | 27.93        | 4.47                        | 3.95                        |
| 29.08  | 28.39        | 27.29        | 0.69                        | 1.79                        |
| 209.32 | 208.77       | 208.42       | 0.55                        | 0.90                        |
| 55.42  | 61.89        | 61.50        | 6.47                        | 6.08                        |
| 45.15  | 52.76        | 52.55        | 7.61                        | 7.40                        |
| 44.77  | 46.70        | 45.82        | 1.93                        | 1.05                        |
| 30.03  | 31.46        | 31.25        | 1.43                        | 1.22                        |
| 19.32  | 18.66        | 18.47        | 0.66                        | 0.85                        |
| 35.38  | 34.20        | 33.95        | 1.18                        | 1.43                        |
| 22.71  | 21.30        | 21.18        | 1.41                        | 1.53                        |
| 21.51  | 19.89        | 19.82        | 1.62                        | 1.69                        |
| 24.28  | 25.45        | 27.09        | 1.17                        | 2.81                        |
|        |              |              | <b>2.70</b>                 | <b>2.89</b>                 |
|        |              |              | RMSD                        | RMSD                        |

SCALED  $^1\text{H}$ -DP4

| Exp 1b | (3R7S11R)-1b | (3S7S11R)-1b | $\Delta\delta$ (3R7S11R)-1b | $\Delta\delta$ (3S7S11R)-1b |
|--------|--------------|--------------|-----------------------------|-----------------------------|
| 6.56   | 6.62         | 6.69         | 0.06                        | 0.13                        |
| 6.45   | 6.47         | 6.54         | 0.02                        | 0.09                        |
| 2.77   | 2.74         | 2.71         | 0.03                        | 0.06                        |
| 2.77   | 2.57         | 2.48         | 0.21                        | 0.30                        |
| 1.86   | 1.91         | 1.76         | 0.05                        | 0.10                        |
| 1.81   | 1.79         | 1.95         | 0.02                        | 0.15                        |
| 2.71   | 2.50         | 2.69         | 0.21                        | 0.01                        |
| 2.57   | 2.48         | 2.39         | 0.09                        | 0.18                        |
| 2.51   | 2.58         | 2.71         | 0.07                        | 0.20                        |
| 2.77   | 2.68         | 2.63         | 0.09                        | 0.14                        |
| 2.17   | 2.18         | 2.18         | 0.01                        | 0.01                        |
| 3.70   | 3.69         | 3.72         | 0.01                        | 0.02                        |
| 1.23   | 0.94         | 0.96         | 0.29                        | 0.26                        |
| 1.04   | 1.04         | 0.98         | 0.00                        | 0.06                        |
| 3.04   | 3.11         | 2.75         | 0.07                        | 0.28                        |
| 2.22   | 2.30         | 2.60         | 0.07                        | 0.37                        |
| 1.94   | 2.15         | 1.50         | 0.21                        | 0.44                        |
| 1.44   | 1.51         | 2.15         | 0.07                        | 0.71                        |
| 1.74   | 1.76         | 1.75         | 0.02                        | 0.01                        |
| 1.74   | 1.75         | 1.72         | 0.01                        | 0.02                        |
| 1.75   | 1.90         | 1.48         | 0.15                        | 0.28                        |
| 1.52   | 1.48         | 1.80         | 0.04                        | 0.28                        |
| 0.80   | 0.86         | 0.95         | 0.05                        | 0.14                        |
| 1.11   | 1.23         | 1.19         | 0.13                        | 0.09                        |
| 1.24   | 1.23         | 1.19         | 0.00                        | 0.05                        |
|        |              |              | <b>0.08</b>                 | <b>0.18</b>                 |
|        |              |              | RMSD                        | RMSD                        |



UNSCALED  $^{13}\text{C}$ -iJ/DP4

| Exp 1b | (3R7S11R)-1b | (3S7S11R)-1b | $\Delta\delta$ (3R7S11R)-1b | $\Delta\delta$ (3S7S11R)-1b |
|--------|--------------|--------------|-----------------------------|-----------------------------|
| 115.64 | 108.25       | 108.03       | 7.39                        | 7.61                        |
| 153.13 | 148.44       | 148.65       | 4.69                        | 4.48                        |
| 111.58 | 110.54       | 110.22       | 1.04                        | 1.36                        |
| 121.16 | 122.92       | 124.16       | 1.76                        | 3.00                        |
| 145.77 | 142.04       | 141.73       | 3.73                        | 4.04                        |
| 127.43 | 124.66       | 124.82       | 2.77                        | 2.61                        |
| 23.06  | 26.57        | 26.64        | 3.51                        | 3.58                        |
| 34.04  | 37.55        | 38.48        | 3.51                        | 4.44                        |
| 76.80  | 78.47        | 79.58        | 1.67                        | 2.78                        |
| 40.37  | 41.62        | 40.36        | 1.25                        | 0.01                        |
| 133.45 | 133.66       | 135.01       | 0.21                        | 1.56                        |
| 155.10 | 164.47       | 164.38       | 9.37                        | 9.28                        |
| 45.15  | 43.08        | 43.70        | 2.07                        | 1.45                        |
| 17.08  | 19.19        | 19.05        | 2.11                        | 1.97                        |
| 55.97  | 52.60        | 52.47        | 3.37                        | 3.50                        |
| 71.17  | 69.54        | 70.04        | 1.63                        | 1.13                        |
| 31.88  | 29.24        | 30.36        | 2.64                        | 1.52                        |
| 29.08  | 30.53        | 28.76        | 1.45                        | 0.32                        |
| 209.32 | 206.47       | 205.83       | 2.85                        | 3.49                        |
| 55.42  | 63.00        | 62.69        | 7.58                        | 7.27                        |
| 45.15  | 54.12        | 53.84        | 8.97                        | 8.69                        |
| 44.77  | 48.37        | 46.78        | 3.60                        | 2.01                        |
| 30.03  | 33.33        | 33.11        | 3.30                        | 3.08                        |
| 19.32  | 20.86        | 20.78        | 1.54                        | 1.46                        |
| 35.38  | 35.98        | 35.87        | 0.60                        | 0.49                        |
| 22.71  | 23.42        | 23.45        | 0.71                        | 0.74                        |
| 21.51  | 22.07        | 22.12        | 0.56                        | 0.61                        |
| 24.28  | 26.79        | 28.58        | 2.51                        | 4.30                        |
|        |              |              | <b>3.08</b>                 | <b>3.10</b>                 |
|        |              |              | <b>RMSD</b>                 | <b>RMSD</b>                 |

UNSCALED  $^1\text{H}$ -iJ/DP4

| Exp 1b | (3R7S11R)-1b | (3S7S11R)-1b | $\Delta\delta$ (3R7S11R)-1b | $\Delta\delta$ (3S7S11R)-1b |
|--------|--------------|--------------|-----------------------------|-----------------------------|
| 6.56   | 6.71         | 6.70         | 0.15                        | 0.14                        |
| 6.45   | 6.56         | 6.56         | 0.11                        | 0.11                        |
| 2.77   | 2.88         | 2.85         | 0.11                        | 0.08                        |
| 2.77   | 2.71         | 2.62         | 0.07                        | 0.16                        |
| 1.86   | 2.06         | 1.92         | 0.20                        | 0.06                        |
| 1.81   | 1.94         | 2.11         | 0.13                        | 0.31                        |
| 2.71   | 2.64         | 2.83         | 0.07                        | 0.12                        |
| 2.57   | 2.62         | 2.53         | 0.05                        | 0.04                        |
| 2.51   | 2.72         | 2.85         | 0.21                        | 0.34                        |
| 2.77   | 2.82         | 2.77         | 0.05                        | 0.01                        |
| 2.17   | 2.32         | 2.33         | 0.16                        | 0.16                        |
| 3.70   | 3.82         | 3.82         | 0.12                        | 0.12                        |
| 1.23   | 1.10         | 1.15         | 0.13                        | 0.07                        |
| 1.04   | 1.20         | 1.17         | 0.16                        | 0.13                        |
| 3.04   | 3.24         | 2.89         | 0.20                        | 0.15                        |
| 2.22   | 2.44         | 2.73         | 0.22                        | 0.51                        |
| 1.94   | 2.29         | 1.67         | 0.35                        | 0.27                        |
| 1.44   | 1.67         | 2.30         | 0.23                        | 0.86                        |
| 1.74   | 1.91         | 1.92         | 0.17                        | 0.17                        |
| 1.74   | 1.90         | 1.88         | 0.16                        | 0.14                        |
| 1.75   | 2.05         | 1.65         | 0.29                        | 0.11                        |
| 1.52   | 1.63         | 1.96         | 0.11                        | 0.44                        |
| 0.80   | 1.02         | 1.13         | 0.21                        | 0.33                        |
| 1.11   | 1.39         | 1.37         | 0.28                        | 0.27                        |
| 1.24   | 1.39         | 1.37         | 0.15                        | 0.13                        |
|        |              |              | <b>0.16</b>                 | <b>0.21</b>                 |
|        |              |              | <b>RMSD</b>                 | <b>RMSD</b>                 |

SCALED  $^{13}\text{C}$ -iJ/DP4

| Exp 1b | (3R7S11R)-1b | (3S7S11R)-1b | $\Delta\delta$ (3R7S11R)-1b | $\Delta\delta$ (3S7S11R)-1b |
|--------|--------------|--------------|-----------------------------|-----------------------------|
| 115.64 | 108.35       | 108.04       | 7.29                        | 7.60                        |
| 153.13 | 149.53       | 149.63       | 3.60                        | 3.50                        |
| 111.58 | 110.69       | 110.28       | 0.89                        | 1.30                        |
| 121.16 | 123.38       | 124.56       | 2.22                        | 3.40                        |
| 145.77 | 142.97       | 142.55       | 2.80                        | 3.22                        |
| 127.43 | 125.16       | 125.23       | 2.27                        | 2.20                        |
| 23.06  | 24.67        | 24.71        | 1.61                        | 1.65                        |
| 34.04  | 35.92        | 36.82        | 1.88                        | 2.78                        |
| 76.8   | 77.84        | 78.91        | 1.04                        | 2.11                        |
| 40.37  | 40.09        | 38.76        | 0.28                        | 1.61                        |
| 133.45 | 134.38       | 135.66       | 0.93                        | 2.21                        |
| 155.1  | 165.94       | 165.73       | 10.84                       | 10.63                       |
| 45.15  | 41.58        | 42.17        | 3.57                        | 2.98                        |
| 17.08  | 17.11        | 16.93        | 0.03                        | 0.15                        |
| 55.97  | 51.34        | 51.15        | 4.63                        | 4.82                        |
| 71.17  | 68.69        | 69.14        | 2.48                        | 2.03                        |
| 31.88  | 27.41        | 28.51        | 4.47                        | 3.37                        |
| 29.08  | 28.72        | 26.88        | 0.36                        | 2.20                        |
| 209.32 | 208.97       | 208.18       | 0.35                        | 1.14                        |
| 55.42  | 61.99        | 61.62        | 6.57                        | 6.20                        |
| 45.15  | 52.89        | 52.55        | 7.74                        | 7.40                        |
| 44.77  | 47.00        | 45.33        | 2.23                        | 0.56                        |
| 30.03  | 31.59        | 31.33        | 1.56                        | 1.30                        |
| 19.32  | 18.82        | 18.70        | 0.50                        | 0.62                        |
| 35.38  | 34.31        | 34.16        | 1.07                        | 1.22                        |
| 22.71  | 21.44        | 21.44        | 1.27                        | 1.27                        |
| 21.51  | 20.06        | 20.08        | 1.45                        | 1.43                        |
| 24.28  | 24.89        | 26.70        | 0.61                        | 2.42                        |
|        |              |              | <b>2.66</b>                 | <b>2.90</b>                 |
|        |              |              | <b>RMSD</b>                 | <b>RMSD</b>                 |

SCALED  $^1\text{H}$ -iJ/DP4

| Exp 1b | (3R7S11R)-1b | (3S7S11R)-1b | $\Delta\delta$ (3R7S11R)-1b | $\Delta\delta$ (3S7S11R)-1b |
|--------|--------------|--------------|-----------------------------|-----------------------------|
| 6.563  | 6.62         | 6.69         | 0.06                        | 0.13                        |
| 6.45   | 6.47         | 6.54         | 0.02                        | 0.09                        |
| 2.774  | 2.74         | 2.71         | 0.03                        | 0.06                        |
| 2.774  | 2.57         | 2.48         | 0.21                        | 0.30                        |
| 1.859  | 1.91         | 1.76         | 0.05                        | 0.10                        |
| 1.805  | 1.79         | 1.95         | 0.02                        | 0.15                        |
| 2.705  | 2.50         | 2.69         | 0.21                        | 0.01                        |
| 2.57   | 2.48         | 2.39         | 0.09                        | 0.18                        |
| 2.506  | 2.58         | 2.71         | 0.07                        | 0.20                        |
| 2.774  | 2.68         | 2.63         | 0.09                        | 0.14                        |
| 2.165  | 2.18         | 2.18         | 0.01                        | 0.01                        |
| 3.701  | 3.69         | 3.72         | 0.01                        | 0.02                        |
| 1.225  | 0.94         | 0.96         | 0.29                        | 0.26                        |
| 1.041  | 1.04         | 0.98         | 0.00                        | 0.06                        |
| 3.038  | 3.11         | 2.75         | 0.07                        | 0.28                        |
| 2.223  | 2.30         | 2.60         | 0.07                        | 0.37                        |
| 1.944  | 2.15         | 1.50         | 0.21                        | 0.44                        |
| 1.441  | 1.51         | 2.15         | 0.07                        | 0.71                        |
| 1.744  | 1.76         | 1.75         | 0.02                        | 0.01                        |
| 1.744  | 1.75         | 1.72         | 0.01                        | 0.02                        |
| 1.754  | 1.90         | 1.48         | 0.15                        | 0.28                        |
| 1.52   | 1.48         | 1.80         | 0.04                        | 0.28                        |
| 0.804  | 0.86         | 0.95         | 0.05                        | 0.14                        |
| 1.105  | 1.23         | 1.19         | 0.13                        | 0.09                        |
| 1.235  | 1.23         | 1.19         | 0.00                        | 0.05                        |
|        |              |              | <b>0.08</b>                 | <b>0.18</b>                 |
|        |              |              | <b>RMSD</b>                 | <b>RMSD</b>                 |

## 6. Anisotropic measurements of 1b

*Fine tuning of 3 mm compression device.* We have tested our in-house-made 3 mm compression device (see the figure below) to do differentiation of epimers by studying an 800- $\mu\text{g}$  sample of estrone in a 600 MHz Bruker spectrometer equipped with a 5 mm cryo-probe. Data was recorded and analyzed using the methodology and models published by our group (Nath, N.; Schmidt, M.; R. Gil, R.; Thomas Williamson, R.; E. Martin, G.; Navarro-Vázquez, A.; Griesinger, C.; Liu, Y. *J Am Chem Soc* **2016**, 138, 9548–9556) Polymerization chamber for Poly-HEMA was a 1.7 mm capillary tube. Mass of gel stick used in the 3 mm compression device was 40 mg while a gel stick of 112 mg is needed for the conventional 5 mm compression device; this implies a less severe alignment media background signal. Smaller amounts of analyte can be analyzed. (For Poly-HEMA preparation: L. F. Gil-Silva, R. Santamaría-Fernández, A. Navarro-Vázquez, R. R. Gil. *Chem A Eur. J.* **2016**, 22, 472-476).

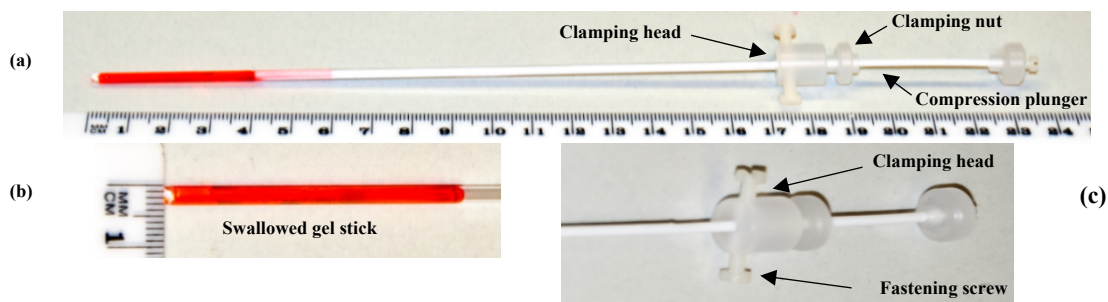

**Figure S32.** Experimental arrangement needed for our in-house-made 3 mm compression device. Complete alignment system shown here includes: a common 3 mm NMR tube, swallowed PMMA (75/0.25) gel in  $\text{CDCl}_3$ , and the semi-micro compression apparatus (a). Fully relaxed swallowed gel stick ideally has a length of 4.5 cm length, while when it is fully compressed has a length of 3.5 cm. (b). Compression device consists of a clamping head/nut and fastening screws, which keep the plunger attached to the 3 mm glass NMR tube when the gel stick is under compression (c). Gel was orange colored using a pigment from Faber Castell.

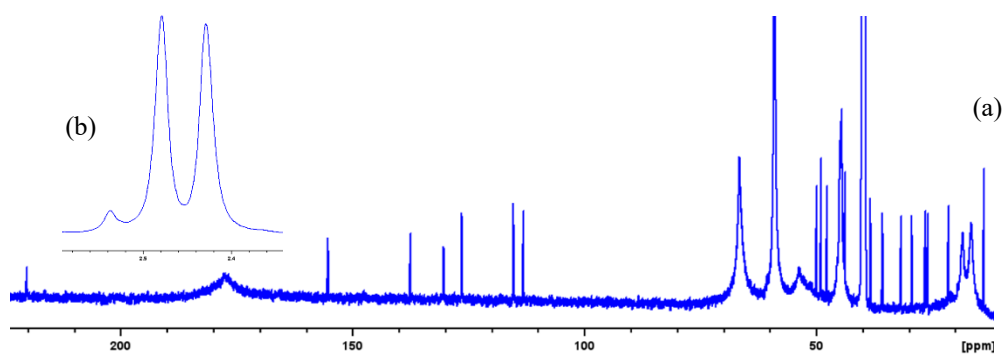

**Figure S33.**  $^{13}\text{C}$   $\{^1\text{H}\}$  spectrum of estrone (800  $\mu\text{g}$ ) swollen in relaxed Poly-HEMA (80/0.27) in a 3 mm compression device. Number of scans 16K. (a). Under anisotropic conditions  $\Delta^2\text{H}_Q$  was 4.6 Hz (b). (NS = 16K, 600 MHz,  $\text{DMSO-d}_6$ ).

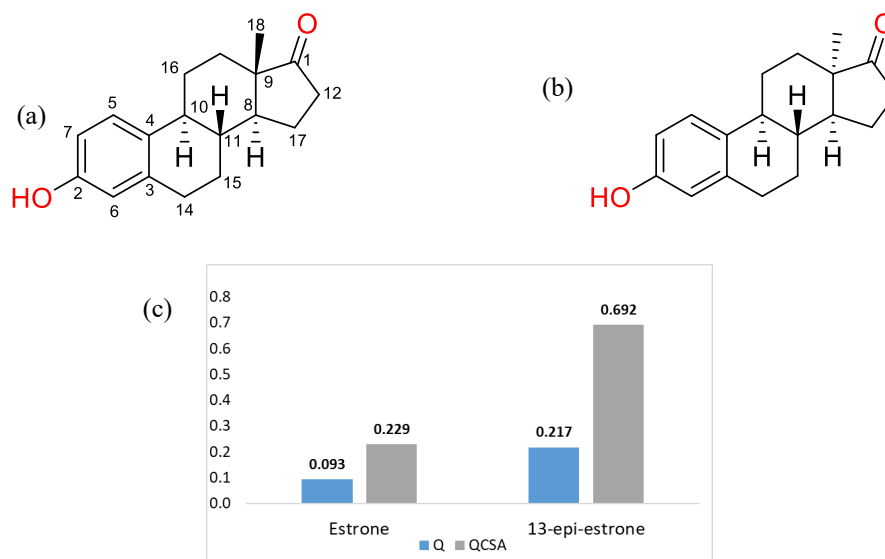

**Figure S34.** Chemical structure of estrone (a) and 13-*epi*-estrone (b). The quality of the data fitting is expressed as a quality factor ( $Q$ ) where the correct structure is expected to have the lowest  $Q$  value. Results from the in-house 3 mm compression device:  $Q$  (blue) and  $Q_{CSA}$  (grey) factors calculated for lowest-energy structures of estrone and 13-*epi*-estrone from DFT calculation (GIAO/MPW1PW91/6-31+g(2d,p) iefpcm=DMSO) using only  $^{13}\text{C}$  RCSAs.

**Table S6.** Estrone uncorrected residual chemical shift anisotropies data (Hz) analyzed in a 3 mm compression device.

| Carbon | $^{13}\text{C}$ RCSA, uncorrected (Hz) | Gel shift (Hz) |
|--------|----------------------------------------|----------------|
| 1      | -1.54                                  | -2.10          |
| 2      | -0.91                                  | -1.59          |
| 3      | -4.88                                  | -6.90          |
| 4      | -1.23                                  | -0.57          |
| 5      | -1.26                                  | -0.98          |
| 6      | 0.31                                   | -1.06          |
| 7      | -0.08                                  | -0.35          |
| 8      | Ref.                                   | Ref.           |
| 9      | -0.68                                  | -0.33          |
| 10     | -3.41                                  | 0.79           |
| 11     | -0.05                                  | -0.30          |
| 12     | -0.77                                  | -1.87          |
| 13     | 0.51                                   | 0.62           |
| 14     | 0.54                                   | 1.08           |
| 15     | 0.36                                   | -0.04          |
| 16     | -0.43                                  | -2.51          |
| 17     | NR                                     | NR             |
| 18     | -0.74                                  | -2.86          |

NR: not readable. C8 was taken as reference

A first attempt to establish the relative configuration of meroditerpene **1b** by  $^{13}\text{C}$  RCSA involved the use of a 4 mg sample in protonated PMMA swollen in  $\text{CD}_2\text{Cl}_2$  using 5 mm outer diameter compression device. Also, 2.2 mg of **1b** was dissolved in  $\text{CD}_2\text{Cl}_2$  and swollen into a deuterated chemically cross-linked poly (methyl methacrylate) gel (PMMA- $d_8$ ) in an in-house made 3 mm outer diameter compression device.

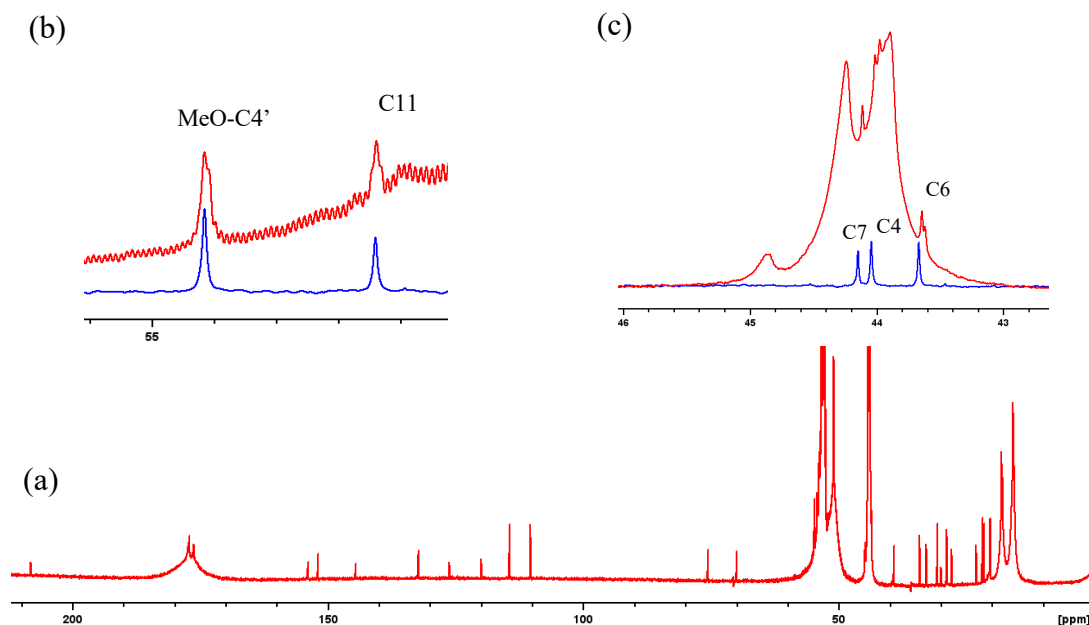

**Figure S35.**  $^{13}\text{C}$   $\{^1\text{H}\}$  spectrum of **1b** swallow on PMMA- $\text{H}_8$  measured in a 950 MHz Bruker spectrometer (5 mm compression device) (a). Buried resonances of **1b** below polymer background signal: MeO- $\text{C4}'$ , C11, C7, C4 and C6 are shown. In blue, isotropic  $^{13}\text{C}$   $\{^1\text{H}\}$  spectrum of **1b** (2 mg sample in an 800 MHz Bruker spectrometer) and in red  $^{13}\text{C}$   $\{^1\text{H}\}$  spectrum of **1b** swallow in PMMA- $\text{H}_8$  (4 mg) (b). NS: 2048. Relaxation delay: 2 s.

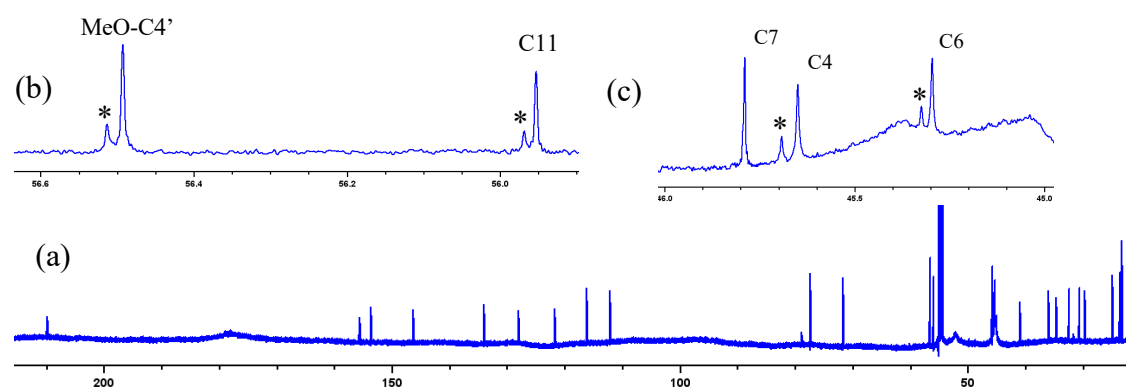

**Figure 36.**  $^{13}\text{C}$   $\{^1\text{H}\}$  spectrum of **1b** swallow on PMMA- $d_8$  measured in an 800 MHz Bruker spectrometer (in-house-made 3 mm compression device) (a). Former buried resonances of **1b** below polymer background are visible now: MeO- $\text{C4}'$ , C11, C7, C4 and C6. Isotropic contribution of some resonances is marked with an asterisk. Sample mass 2.2 mg. NS: 7200. Relaxation delay: 2 s.

### Preparation of deuterated compression compatible PMMA gel (PMMA- $d_8$ gel)

This procedure is a modified version of a reported before; [1,2] where the monomer and solvent are replaced by its deuterated version as Methyl- $d_3$  methacrylate- $d_5$  (MMA- $d_8$ ) and acetone- $d_6$  respectively. [3,4] Monomer concentration was 70 % v/v, molar concentration of EGDMA (cross-linker) was established as 0.25 %. Another Monomer/Crosslinker ratio are also possible like 75/0.25. Cross linker and the radical initiator (V-70) were not deuterated. Polymerization was performed in either 1.5- or 1.7-mm outer diameter capillary tube in a water bath (50 °C/5 h). After gel synthesis is completed reaction chamber is opened and gel sticks are allowed to dry for 10 days. Afterward, gel sticks were washed 2 times in a methanol- $d_4$ /acetone- $d_6$  solution 1:1 (*Solution A*) for 48 h. Finally, gel sticks are subject to dialysis with the solvent chosen for the analysis several times during 48 h. Now, gels are cut into 4.5 cm pieces and are ready to be either use or storage. These gels can be stored, to our knowledge, for up to 1 year if they are immersed in deuterated solvent. The gel thus prepared, named PMMA- $d_8$  70/0.25 is compatible with  $CD_2Cl_2$  and  $CDCl_3$ . The same gel stick can be reused at least 2 times if it is longer soak in *solution A*. The use of protonated solvents during the gel washing must be avoided due its use contaminates the gel sticks. Chemicals used in the synthesis was purchased either at Sigma-Aldrich or Wako, while deuterated washing solvents were purchased at Deutero.

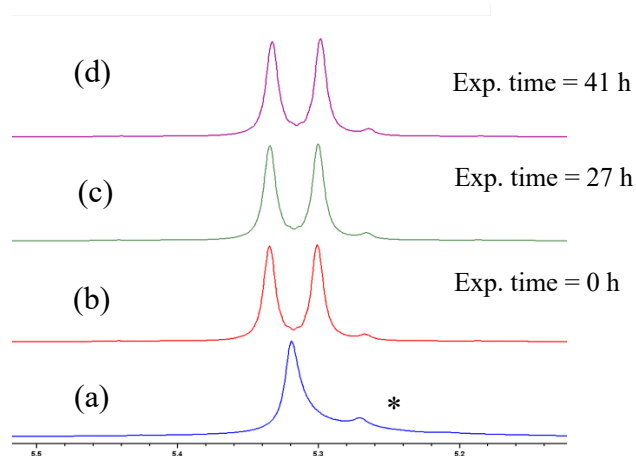

**Figure S37.** 1D  $^2H$  spectrum of  $CD_2Cl_2$  in the sample of compound **1b**, when PMMA- $d_8$  gel stick is fully relaxed (a).  $^2H$  spectrum of  $CD_2Cl_2$  on fully compressed PMMA- $d_8$  gel (b), and evolution of it through the time. Experimental time is expressed in hours (Exp. Time) (c-d). PMMA- $d_8$  yields a stable  $\Delta^2H_Q$  (4.2 Hz) during at least 41 h. (Solvent  $CD_2Cl_2$ ).

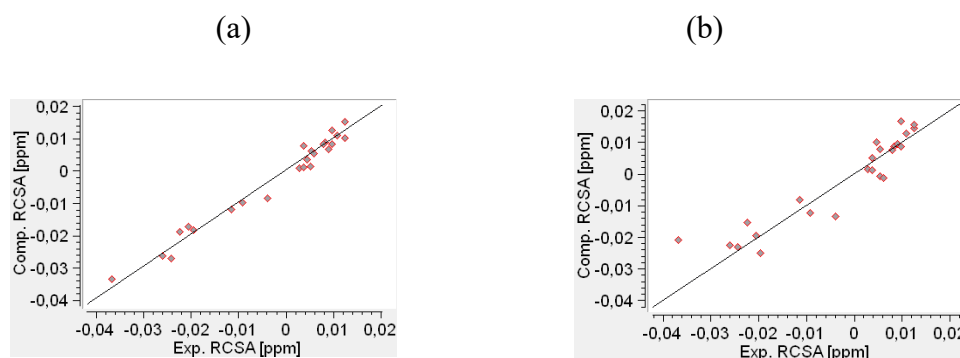

**Figure S38**  $^{13}C$ -RCSA analysis of meroditerpene **1b** swollen in 70/0.25 PMMA- $d_8$  gel (200 MHz,  $CD_2Cl_2$ ) Fitting for carbon residual chemical shift anisotropies of diastereoisomers (**3R\*,7S\*,11R\***)-**1b** (a) and (**3S\*,7S\*,11R\***)-**1b** (b), when automatic isotropic shift correction is not applied.  $Q$  factors were 0.164 (a) and 0.358 (b).



In the Jackknife analysis each data set presented a student's  $t$ -distribution with  $N - k - 1$  degrees of freedom. It allows us quickly visualized that the 24 jackknifed samples do not change the discrimination from the overall population with respect to the quality factor using the full data set and moreover, discrimination between possible configuration is present in all generated data sets.  $Q_{\text{Jack} \pm S_{\text{Jack}}} (3R^*, 7S^*, 11R^*)\text{-1b} = 0.101 \pm 0.004$  and  $Q_{\text{Jack} \pm S_{\text{Jack}}} (3S^*, 7S^*, 11R^*)\text{-1b} = 0.417 \pm 0.030$ . Comparing these  $t$ -calculated values with the tabulated  $\alpha$  significant level of 1% ( $t_{\text{calc.}} = 2.0687$ ), confidence interval was computed, corroborating our initial assumption of the relative configuration of **1b** as  $3R^*, 7S^*, 11R^*$ .

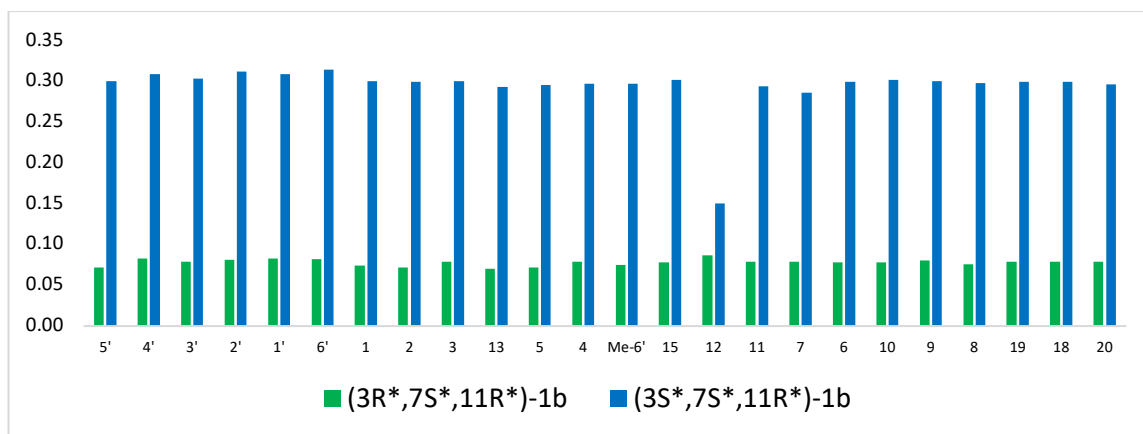

**Figure S39.** Resample influence bar-plot for the Jackknife analysis of  $^{13}\text{C}$  RCSA of compound **1b**.

#### References

1. Gayathri, C.; Tsarevsky, N. v.; Gil, R.R. Residual Dipolar Couplings (RDCs) Analysis of Small Molecules Made Easy: Fast and Tuneable Alignment by Reversible Compression/Relaxation of Reusable PMMA Gels. *c* 2010, 16, 3622–3626, doi:10.1002/chem.200903378.
2. Nath, N.; Schmidt, M.; Gil, R.R.; Williamson, R.T.; Martin, G.E.; Navarro-Vázquez, A.; Griesinger, C.; Liu, Y. Determination of Relative Configuration from Residual Chemical Shift Anisotropy. *Journal of the American Chemical Society* 2016, 138, 9548–9556, doi:10.1021/jacs.6b04082
3. Hatada, K., Kitayama, T. & Yuki, H. Studies on the radical polymerization of methyl methacrylate using perdeuterated monomer. *Die Makromol. Chemie, Rapid Commun.* **1**, 51–56 (2018).
4. Hatada, K., Kitayama, T. & Masuda, E. Studies on the Radical Polymerization of Methyl Methacrylate in Bulk and in Benzene Using Totally Deuterated Monomer Technique. *Polym. J.* **18**, 395 (1986).

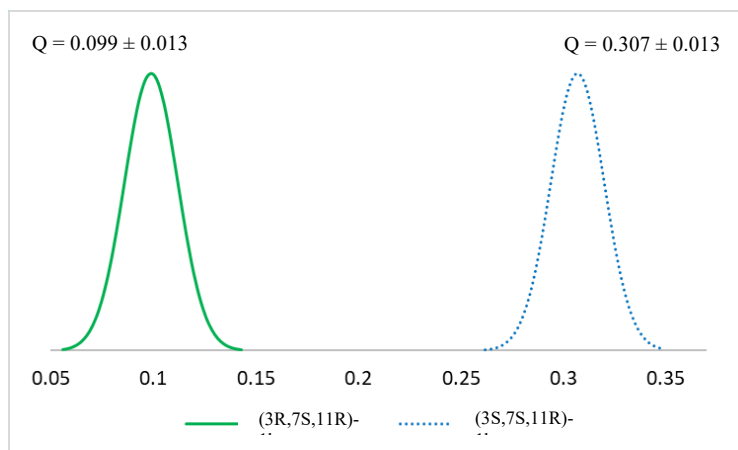

**Figure S40.** Bootstrapping bell curves for  $^{13}\text{C}$  RCSA analysis of  $(3R^*,7S^*,11R^*)\text{-1b}$  and  $(3S^*,7S^*,11R^*)\text{-1b}$  are indicated in green line and dashed blue line, respectively. Inspection of bell curves derived from Bootstrapping, made discrimination between diastereoisomers evident. (Sample size = 5000 points, distribution: Gaussian).

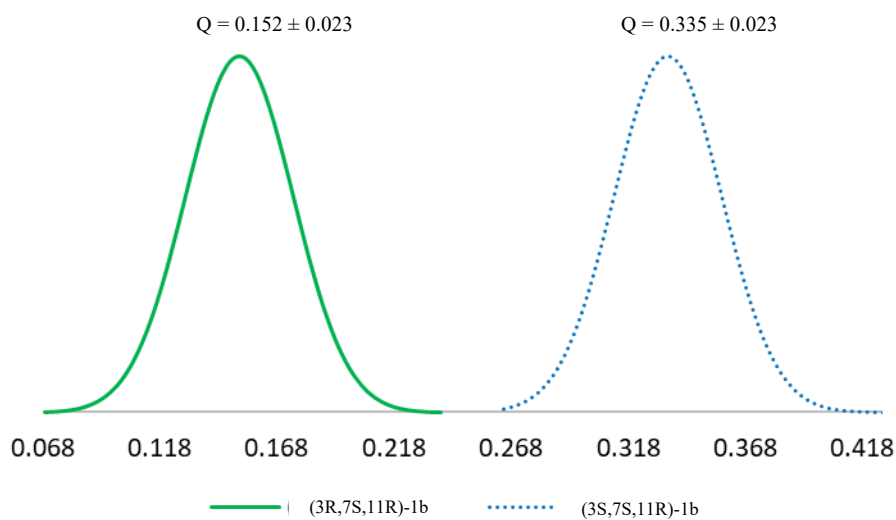

**Figure S41.** Bootstrapping bell curves for  $^1D_{\text{CH}}$  analysis of  $(3R^*,7S^*,11R^*)\text{-1b}$  and  $(3S^*,7S^*,11R^*)\text{-1b}$  are indicated in green and dashed blue, respectively. (Sample size = 5000 points, distribution: Gaussian).

*CASE 3-D analysis of both configurations of compound 1b.*

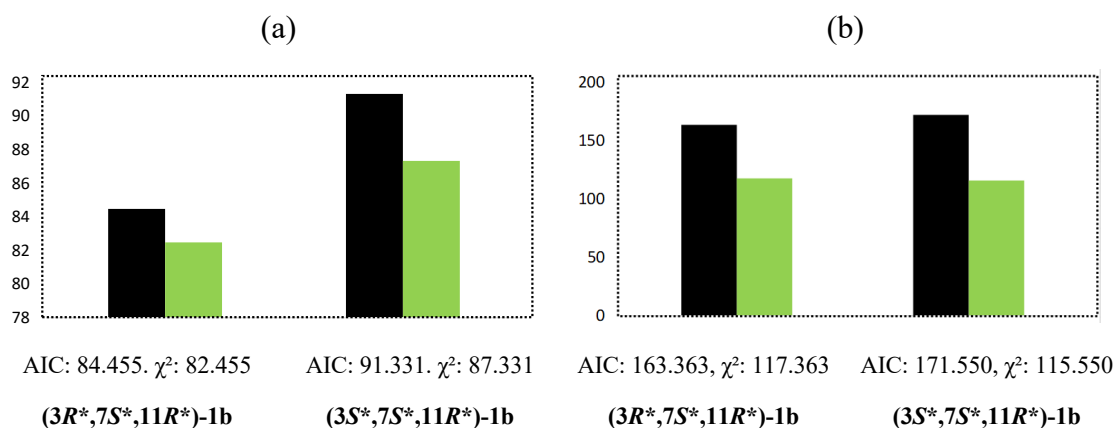

**Figure S42.** Bar plots for the CASE-3D analysis (AIC: black,  $\chi^2$ : green) of both plausible configurations of compound **1b**. When conformer populations are fitted to its minimum by NMR isotropic data (a) and when populations were weighted by DFT energies at B3LYP/6-31G(d,p) level (b). Study was done on the same batch of conformers used in the *J*-DP4 analysis. The **(3R\*,7S\*,11R\*)-1b** configuration scores better.

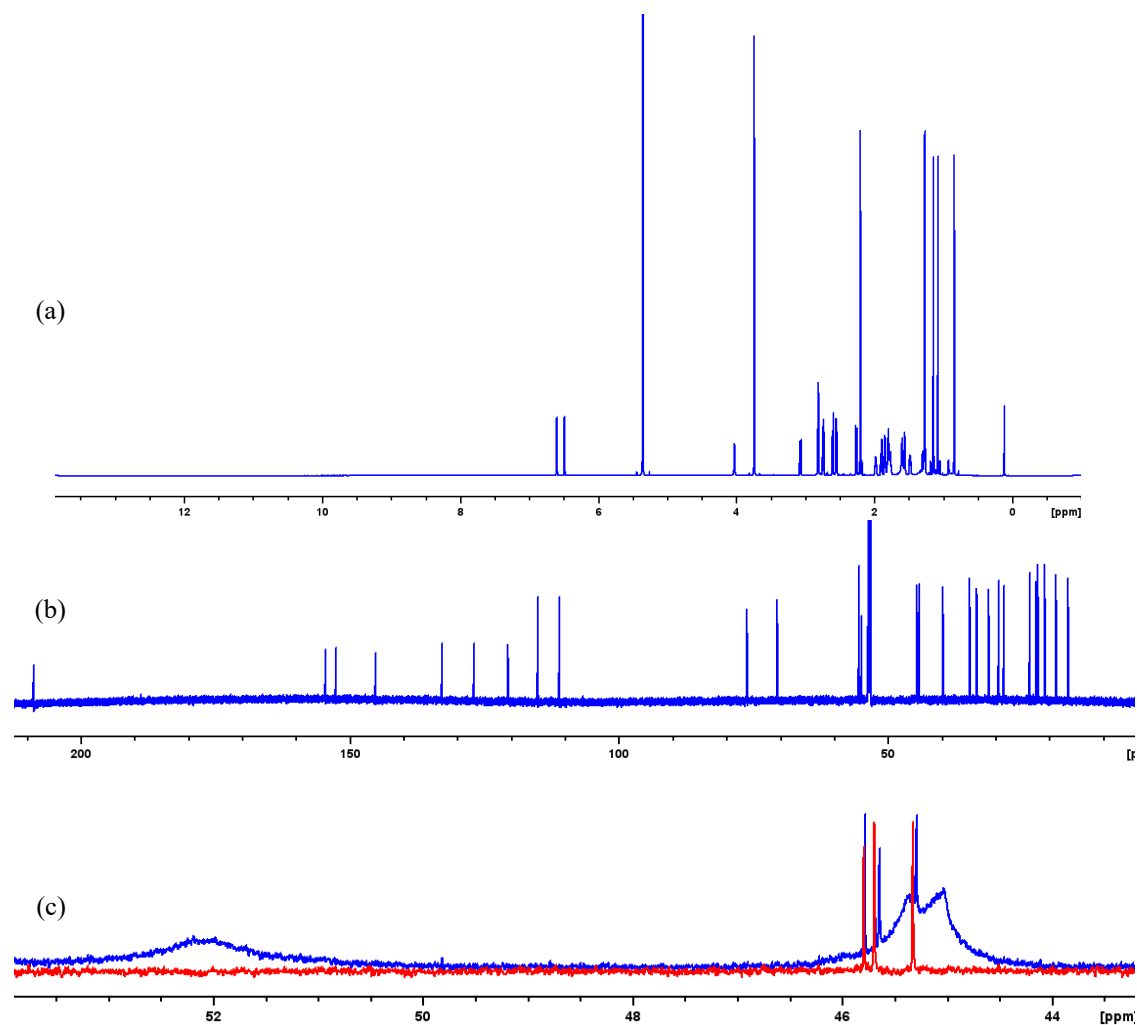

**Figure S43.**  $^1\text{H}$ -1D experiment (a) and  $^{13}\text{C} \{^1\text{H}\}$  spectrum (b) of **1b** recovered from the anisotropic sample (PMMA- $d_8$ ), NS was 16 and 800 respectively. No polymer resonances were observed in both  $^{13}\text{C} \{^1\text{H}\}$  and  $^1\text{H}$  1D spectra of the recovered sample (b). Comparison between the  $^{13}\text{C} \{^1\text{H}\}$  spectrum PMMA-H8 (blue) and PMMA- $d_8$  (red) (d); it is evident the reduction in the polymer background signal when PMMA- $d_8$  is used. Experiments were measured either at 800 or 950 MHz/ $\text{CD}_2\text{Cl}_2$ .

**Table S7.** Uncorrected carbon residual chemical shift anisotropies data (Hz) for **1b**. C14 was taken as reference

| Carbon | <sup>13</sup> C RCSA uncorrected | Gel shift |
|--------|----------------------------------|-----------|
| 1      | 1.7                              | 11.8      |
| 2      | 0.7                              | 5.2       |
| 3      | 1.8                              | 14.0      |
| 4      | 0.9                              | 3.2       |
| 5      | -3.9                             | -0.3      |
| 6      | 0.6                              | 6.0       |
| 7      | 2.0                              | 10.7      |
| 8      | 2.2                              | 13.2      |
| 9      | 2.5                              | 11.8      |
| 10     | 2.0                              | 11.8      |
| 11     | 1.1                              | 8.5       |
| 12     | -7.4                             | -17.1     |
| 13     | -0.8                             | 13.1      |
| 14     | Ref.                             | Ref.      |
| 15     | 2.5                              | 15.1      |
| 16     | 5.5                              | 9.9       |
| 17     | 2.2                              | 20.3      |
| 18     | 1.1                              | 13.3      |
| 19     | 0.7                              | 11.8      |
| 20     | 1.2                              | 20.5      |
| 1'     | -5.2                             | 8.7       |
| 2'     | -4.1                             | 9.6       |
| 3'     | -2.3                             | 13.3      |
| 4'     | -4.9                             | 13.1      |
| 5'     | -1.8                             | 11.8      |
| 6'     | -4.5                             | 3.5       |
| Me-6'  | 1.6                              | 11.8      |
| MeO-4' | 1.1                              | 7.6       |

## 7. Absolute configuration of 1b by TD-DFT ECD.

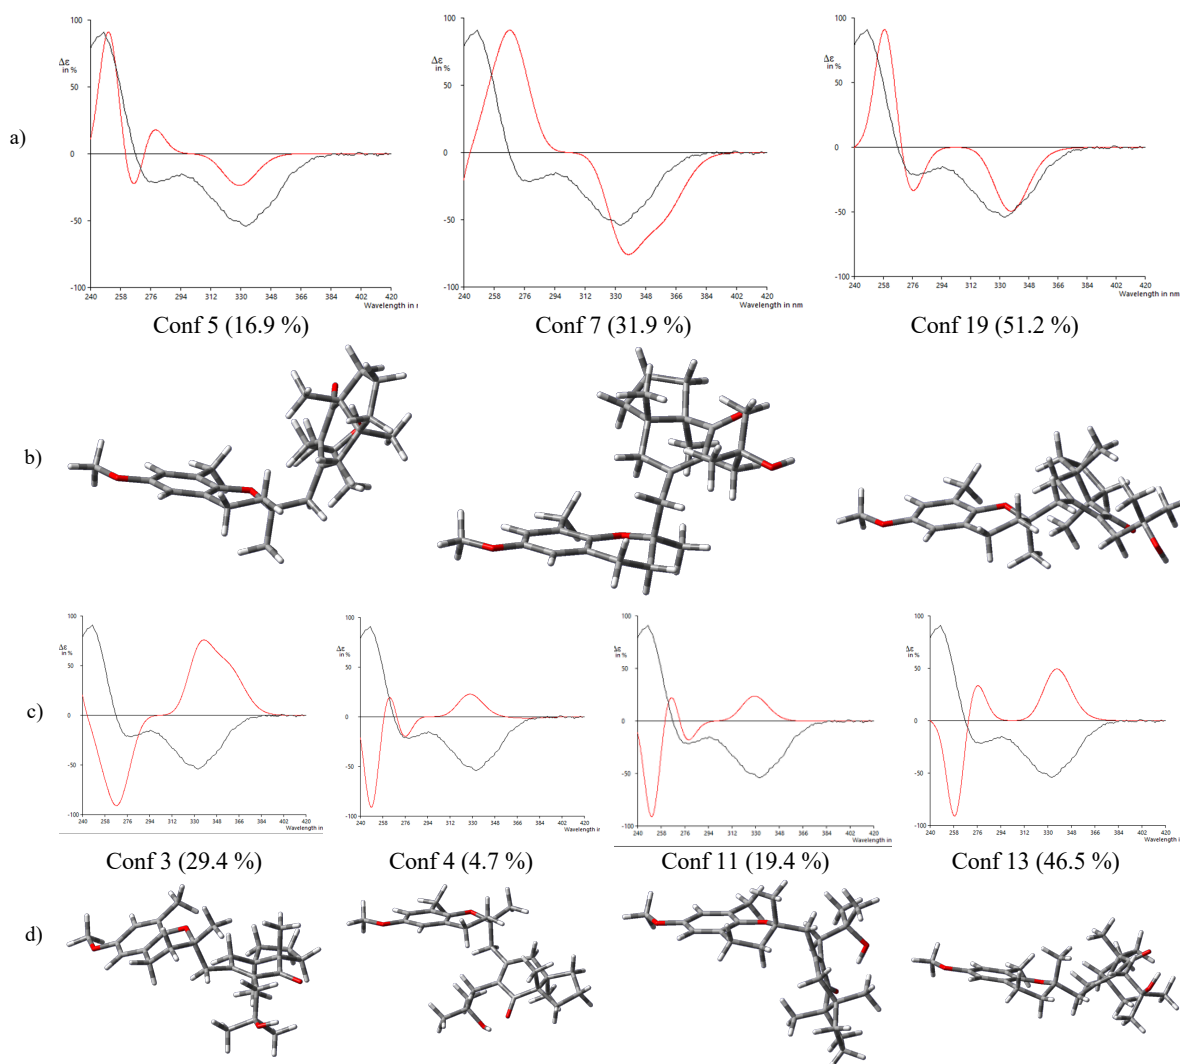

**Figure 44.** Calculated (red line) and experimental (black line) ECD of the conformers of (3R,7S,11R)-1b (a) and (3S,7R,11S)-1b (c). Conformers and its population are displayed in panels b and d respectively. Conformers were weighted by NMR anisotropy. ECD was computed at level: HSE0/6-311G+(2d,p)/DGA1 (solvent model/parameters/n-states: IEFPCM/CH<sub>2</sub>Cl<sub>2</sub>/38)

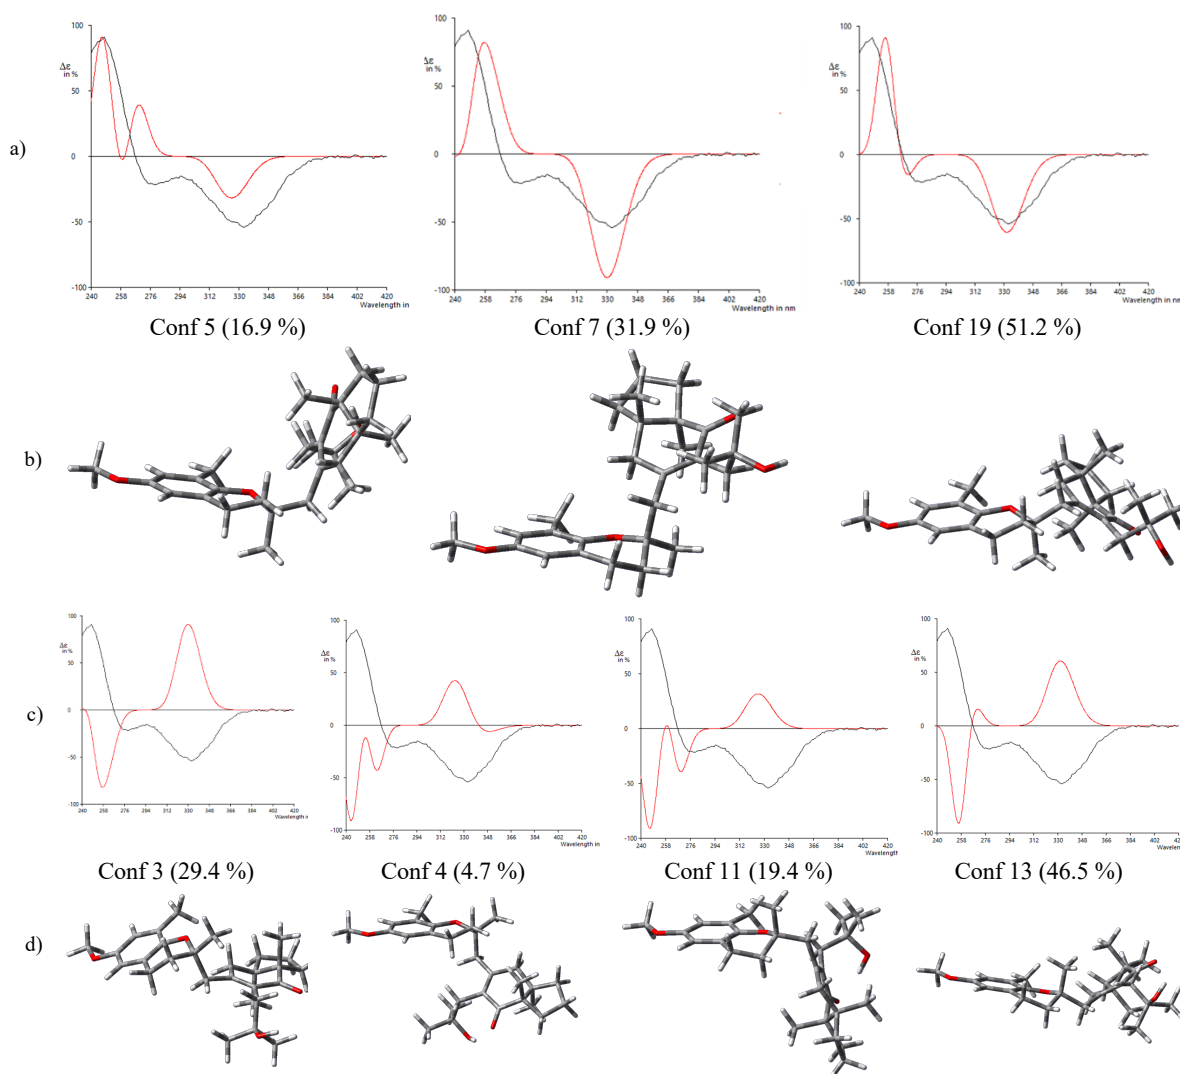

**Figure 45.** Calculated (red line) and experimental (black line) ECD of the conformers of **(3R,7S,11R)-1b** (a) and **(3S,7R,11S)-1b** (c). Conformers and its population are displayed in panels b and d respectively. Conformers were weighted by NMR anisotropy. ECD was computed at level: PBE0/Def2TZV/W06 (solvent model/parameters/n-states: COSMO/CH<sub>2</sub>Cl<sub>2</sub>/50).

**Table S8.** Comparison of experimental and calculated  $[\alpha]_D^{25}$  values for compound **1b** and both stereoisomers pairs. Optical rotation ( $[\alpha]_D^{25}$ ) was computed at CAM-B3LYP/6-311++(2d,2p)/DGA1 IEPCM (CH<sub>2</sub>Cl<sub>2</sub>) level of theory.

| $[\alpha]_D^{25}$ ( <b>1b</b> ) Exp. | $[\alpha]_D^{25}$ Calc. ( <b>3R,7S,11R</b> )- <b>1b</b> | $[\alpha]_D^{25}$ Calc. ( <b>3S,7R,11S</b> )- <b>1b</b> |
|--------------------------------------|---------------------------------------------------------|---------------------------------------------------------|
| -11.7                                | -49.4                                                   | +37.3                                                   |

$[\alpha]_D^{25}$  is expressed in deg\*dm<sup>-1</sup>(g/mL)<sup>-1</sup>

## 8. DFT Calculations for (-)- $\alpha$ -santonin

**Table S9.** Functional-basis set combinational used on (-)- $\alpha$ -santonin test systems.

Note: The combination was chosen based on the linearity of the fits, low standard deviation and necessary calculation time.

| Functional | Basis set       | Solvent model | Density Fitting |
|------------|-----------------|---------------|-----------------|
| OLYP       | Def2SV          | Gas phase     | *               |
| OLYP       | Def2TZV         | Gas phase     | *               |
| OLYP       | Def2SV          | COSMO         | *               |
| OLYP       | Def2SVP         | COSMO         | *               |
| OLYP       | Def2SVPP        | COSMO         | *               |
| OLYP       | Def2TZV         | COSMO         | *               |
| OLYP       | Def2TZVP        | COSMO         | *               |
| OLYP       | Def2TZVPP       | COSMO         | *               |
| OLYP       | Def2QZV         | COSMO         | *               |
| OLYP       | Def2QZVP        | COSMO         | *               |
| OLYP       | Def2QZVPP       | COSMO         | *               |
| mPW1PW91   | 6-311+g(2d,p)   | Gas phase     | *               |
| mPW1PW91   | 6-311++g(2d,p)  | Gas phase     | *               |
| mPW1PW91   | 6-311+g(2d,p)   | COSMO         | *               |
| mPW1PW91   | 6-311++g(2d,p)  | COSMO         | *               |
| mPW1PW91   | 6-311++g(2d,p)  | COSMO         | *               |
| mPW1PW91   | 6-311++g(2d,p)  | COSMO         | *               |
| mPW1PW91   | 6-311++g(3d,3p) | COSMO         | *               |
| mPW1PW91   | 6-31+g(d,p)     | COSMO         | *               |
| mPW1PW91   | 6-311++g(2d,p)  | IEFPCM        | *               |
| mPW1PW91   | cc-pVDZ         | IEFPCM        | *               |
| mPW1PW91   | aug-cc-pVDZ     | IEFPCM        | *               |
| mPW1PW91   | cc-pVTZ         | IEFPCM        | *               |

| Functional | Basis set      | Solvent model | Density Fitting |
|------------|----------------|---------------|-----------------|
| PBE0       | Def2SV         | COSMO         | AUTO            |
| PBE0       | Def2SVP        | COSMO         | AUTO            |
| PBE0       | Def2SVPP       | COSMO         | AUTO            |
| PBE0       | Def2TZV        | COSMO         | AUTO            |
| PBE0       | cc-pVDZ        | IEFPCM        | DGA1            |
| PBE0       | Aug-cc-pVDZ    | IEFPCM        | DGA1            |
| B972       | cc-pVDZ        | IEFPCM        | *               |
| B972       | Aug-cc-pVDZ    | IEFPCM        | *               |
| B972       | cc-pVTZ        | IEFPCM        | *               |
| B972       | Aug-cc-pVTZ    | IEFPCM        | *               |
| B972       | 6-311++G(2d,p) | IEFPCM        | *               |
| B972       | 6-311++G(2d,p) | COSMO         | *               |
| HSE06      | 6-31G(2d,p)    | COSMO         | AUTO            |
| HSE06      | 6-31G++(3d,2p) | COSMO         | AUTO            |
| HSE06      | 6-311G++(2d,p) | COSMO         | AUTO            |
| HSE06      | 6-311G+(2d,p)  | COSMO         | AUTO            |
| wB97x      | 6-311+G(2d,p)  | COSMO         | AUTO            |
| wB97x      | 6-311+G(2d,p)  | IEFPCM        | AUTO            |
| CAM-B3LYP  | 6-31+gG(d,p)   | IEFPCM        | AUTO            |
| CAM-B3LYP  | 6-311++G(2d,p) | IEFPCM        | AUTO            |
| CAM-B3LYP  | 6-311++G(2d,p) | COSMO         | AUTO            |
| CAM-B3LYP  | cc-pVDZ        | IEFPCM        | AUTO            |
| CAM-B3LYP  | Aug-cc-pVDZ    | IEFPCM        | AUTO            |

\* No Density Fitting required



**Table S10.** Computation time needed for various combinations of functional/basis set combinational. Test systems: (-)- $\alpha$ -santonin.

| Functional | Basis set      | Solvent model | Density Fitting | Calculation time (min) |
|------------|----------------|---------------|-----------------|------------------------|
| OLYP       | Def2TZV        | Gas phase     | *               | 29                     |
| mPW1PW91   | 6-311+g(2d,p)  | Gas phase     | *               | 192                    |
| PBE0       | Def2TZV        | COSMO         | DGA1            | 40                     |
| HSE06      | 6-311+G(2d,p)  | COSMO         | AUTO            | 81                     |
| B972       | 6-311++G(2d,p) | IEFPCM        | *               | 221                    |
| CAM-B3LYP  | 6-311++G(2d,p) | IEFPCM        | AUTO            | 262                    |

\* No Density Fitting required

## **9. Molecular coordinates**

# Molecular coordinates of the standards

## (-)- $\alpha$ -santonin

|   |           |           |           |
|---|-----------|-----------|-----------|
| C | 3.475210  | -0.306748 | -0.527337 |
| C | 2.925708  | 1.053918  | -0.423308 |
| C | 1.498690  | 1.217786  | 0.002389  |
| C | 0.755834  | 0.120521  | 0.296746  |
| C | 1.327515  | -1.312675 | 0.296905  |
| C | 2.743129  | -1.378501 | -0.202107 |
| C | -0.716943 | 0.069254  | 0.632895  |
| C | -1.495848 | -0.754180 | -0.410666 |
| C | -1.042650 | -2.207761 | -0.371289 |
| C | 0.474884  | -2.255090 | -0.625708 |
| O | -1.450704 | 1.310985  | 0.713530  |
| C | -2.759606 | 1.091798  | 0.366420  |
| C | -2.940027 | -0.364143 | -0.080766 |
| O | 3.622363  | 2.032425  | -0.695775 |
| O | -3.588493 | 1.963254  | 0.426934  |
| C | 1.360869  | -1.882932 | 1.750523  |
| H | -1.252602 | -0.337595 | -1.400299 |
| C | 1.051130  | 2.659340  | 0.029204  |
| C | -3.981427 | -0.524898 | -1.186913 |
| H | 4.502256  | -0.384810 | -0.871415 |
| H | 3.171159  | -2.378260 | -0.270738 |
| H | -0.832437 | -0.410574 | 1.615313  |
| H | -1.295024 | -2.655861 | 0.598975  |
| H | -1.556127 | -2.802227 | -1.135639 |
| H | 0.663158  | -1.966258 | -1.667131 |
| H | 0.848598  | -3.279499 | -0.510668 |
| H | -3.268873 | -0.917919 | 0.813885  |
| H | 0.361648  | -2.023150 | 2.170006  |
| H | 1.856652  | -2.859396 | 1.753985  |
| H | 1.919849  | -1.214016 | 2.410847  |
| H | 1.820865  | 3.260796  | 0.520854  |
| H | 0.977813  | 3.049540  | -0.993106 |
| H | 0.097079  | 2.800779  | 0.525829  |
| H | -4.940832 | -0.106315 | -0.871940 |
| H | -4.127494 | -1.581687 | -1.431504 |
| H | -3.669832 | -0.001002 | -2.096693 |

## Strychnine

### Conformer 1 (Population 97.5 %)

|   |           |           |           |
|---|-----------|-----------|-----------|
| C | 2.358819  | 0.439179  | 0.172033  |
| C | 2.012958  | -0.912857 | 0.023033  |
| C | 2.989053  | -1.844756 | -0.315967 |
| C | 4.307009  | -1.416621 | -0.511967 |
| C | 4.635872  | -0.068587 | -0.352967 |
| C | 3.670774  | 0.882314  | -0.004967 |
| C | 0.552980  | -1.128006 | 0.365033  |
| N | 1.208742  | 1.198062  | 0.488033  |
| C | 1.081602  | 2.563049  | 0.314033  |
| O | 2.037525  | 3.317147  | 0.194033  |
| C | 0.000830  | 0.335938  | 0.415033  |
| C | -0.359450 | 3.074901  | 0.317033  |
| C | -1.420362 | 2.203792  | -0.411967 |
| C | -0.814222 | 0.835855  | -0.792967 |
| O | -2.523355 | 2.141680  | 0.488033  |
| C | -3.714293 | 1.535557  | -0.022967 |
| C | -3.717139 | 0.034557  | 0.139033  |
| C | -2.821057 | -0.767352 | -0.447967 |
| C | -2.720905 | -2.251341 | -0.154967 |
| C | -1.739111 | -0.243241 | -1.392967 |
| C | -0.819992 | -1.405146 | -1.816967 |
| C | -0.268923 | -2.079090 | -0.557967 |
| C | 0.366053  | -1.839025 | 1.730033  |
| C | -1.098902 | -2.281174 | 1.703033  |
| N | -1.367868 | -2.619202 | 0.293033  |
| H | 2.735060  | -2.895713 | -0.426220 |
| H | 5.074971  | -2.135595 | -0.781009 |
| H | 5.662214  | 0.254978  | -0.501121 |
| H | 3.916806  | 1.928318  | 0.115560  |
| H | -0.597956 | 0.476118  | 1.320637  |
| H | -0.328708 | 4.091553  | -0.077958 |
| H | -0.683401 | 3.148803  | 1.362390  |
| H | -1.751302 | 2.708509  | -1.333677 |
| H | -0.088478 | 1.062229  | -1.588140 |
| H | -3.849794 | 1.826788  | -1.077808 |
| H | -4.533867 | 1.981199  | 0.547025  |
| H | -4.457067 | -0.392404 | 0.814562  |
| H | -2.973963 | -2.842036 | -1.044777 |
| H | -3.432791 | -2.544808 | 0.621993  |
| H | -2.224675 | 0.185628  | -2.282287 |
| H | 0.009706  | -1.034818 | -2.429010 |
| H | -1.356789 | -2.137107 | -2.429171 |
| H | 0.389220  | -2.907698 | -0.853249 |
| H | 0.605041  | -1.191153 | 2.579037  |
| H | 1.032852  | -2.707258 | 1.774778  |
| H | -1.285770 | -3.143941 | 2.353601  |
| H | -1.750350 | -1.461890 | 2.048713  |

### Conformer 2 (Population 2.5 %)

|   |           |           |           |
|---|-----------|-----------|-----------|
| C | -2.315948 | 0.484072  | -0.171963 |
| C | -1.953006 | -0.867943 | -0.064963 |
| C | -2.933047 | -1.826902 | 0.172037  |
| C | -4.268030 | -1.428845 | 0.307037  |
| C | -4.610972 | -0.078830 | 0.195037  |
| C | -3.642930 | 0.899128  | -0.049963 |
| C | -0.464014 | -1.060007 | -0.303963 |
| N | -1.165915 | 1.272022  | -0.387963 |
| C | -1.064856 | 2.634018  | -0.206963 |
| O | -2.037825 | 3.373060  | -0.110963 |
| C | 0.048049  | 0.422971  | -0.343963 |
| C | 0.362168  | 3.196957  | -0.155963 |
| C | 1.493129  | 2.279909  | 0.390037  |
| C | 0.900071  | 0.928934  | 0.828037  |
| O | 2.451124  | 2.181868  | -0.662963 |
| C | 3.665096  | 1.501816  | -0.333963 |
| C | 3.566031  | -0.001180 | -0.465963 |
| C | 2.744998  | -0.759144 | 0.272037  |
| C | 2.637934  | -2.263141 | 0.095037  |
| C | 1.843024  | -0.167106 | 1.355037  |
| C | 0.926977  | -1.268067 | 1.927037  |
| C | 0.259945  | -1.996038 | 0.761037  |
| C | -0.167046 | -1.798020 | -1.657963 |
| C | 0.676901  | -3.041057 | -1.278963 |
| N | 1.260912  | -2.792082 | 0.037037  |
| H | -2.669966 | -2.878799 | 0.248042  |
| H | -5.037685 | -2.171656 | 0.494212  |
| H | -5.649510 | 0.222622  | 0.297481  |
| H | -3.897337 | 1.946724  | -0.135760 |
| H | 0.621861  | 0.580437  | -1.259992 |
| H | 0.288199  | 4.124556  | 0.415687  |
| H | 0.642625  | 3.481460  | -1.176827 |
| H | 1.977584  | 2.759487  | 1.255716  |
| H | 0.221858  | 1.167889  | 1.659953  |
| H | 3.980629  | 1.790917  | 0.682627  |
| H | 4.411012  | 1.891946  | -1.031215 |
| H | 4.178205  | -0.470312 | -1.235202 |
| H | 3.148950  | -2.744326 | 0.943357  |
| H | 3.175099  | -2.581554 | -0.802903 |
| H | 2.467467  | 0.255328  | 2.156121  |
| H | 0.174000  | -0.828488 | 2.589065  |
| H | 1.489330  | -1.995025 | 2.522775  |
| H | -0.504130 | -2.684883 | 1.144250  |
| H | 0.392653  | -1.141063 | -2.330936 |
| H | -1.090492 | -2.075010 | -2.173753 |
| H | 0.028049  | -3.924846 | -1.207686 |
| H | 1.453391  | -3.273551 | -2.013764 |

Estrone

Epi-Estrone

|   |           |           |           |   |           |           |           |
|---|-----------|-----------|-----------|---|-----------|-----------|-----------|
| O | 5.936588  | -0.237916 | 0.279353  | O | 5.818590  | -0.254463 | 0.523426  |
| C | 2.589156  | -1.513060 | -0.339099 | C | 2.506981  | -1.541761 | -0.242045 |
| C | 3.963629  | -1.469877 | -0.157769 | C | 3.868115  | -1.496075 | 0.017388  |
| C | 4.575235  | -0.248612 | 0.105147  | C | 4.470383  | -0.266535 | 0.266783  |
| C | 3.802059  | 0.901947  | 0.176343  | C | 3.702537  | 0.889065  | 0.238471  |
| C | 2.416765  | 0.857595  | -0.005149 | C | 2.330281  | 0.841018  | -0.025392 |
| C | 1.639957  | 2.154910  | 0.108979  | C | 1.553505  | 2.140935  | -0.048008 |
| C | 0.215761  | 2.065413  | -0.435825 | C | 0.204379  | 2.012778  | -0.750980 |
| C | -0.461920 | 0.788460  | 0.061550  | C | -0.553855 | 0.791123  | -0.224865 |
| C | 0.277827  | -0.443493 | -0.519127 | C | 0.215527  | -0.490997 | -0.593579 |
| C | 1.783771  | -0.369341 | -0.263939 | C | 1.705105  | -0.392858 | -0.260113 |
| C | -0.372184 | -1.770713 | -0.069096 | C | -0.494464 | -1.697407 | 0.038169  |
| C | -1.889422 | -1.828465 | -0.337284 | C | -1.910170 | -1.838067 | -0.518199 |
| C | -2.594934 | -0.604664 | 0.247960  | C | -2.761847 | -0.569734 | -0.394729 |
| C | -1.937722 | 0.681412  | -0.310408 | C | -2.022526 | 0.761405  | -0.709701 |
| C | -2.936494 | 1.800149  | 0.036008  | C | -2.881816 | 1.832135  | 0.017771  |
| C | -4.300741 | 1.128938  | -0.233128 | C | -3.364334 | 1.150746  | 1.307860  |
| C | -4.048559 | -0.380678 | -0.160093 | C | -3.299301 | -0.343061 | 1.025817  |
| C | -2.626361 | -0.674432 | 1.797774  | C | -4.018311 | -0.720929 | -1.289481 |
| O | -4.873467 | -1.236836 | -0.391690 | O | -3.636893 | -1.214792 | 1.796027  |
| H | 6.232903  | 0.661773  | 0.464153  | H | 6.110571  | 0.651402  | 0.683693  |
| H | 2.138909  | -2.474468 | -0.548972 | H | 2.063197  | -2.509007 | -0.441891 |
| H | 4.564246  | -2.369002 | -0.219775 | H | 4.466565  | -2.398741 | 0.026380  |
| H | 4.281599  | 1.856985  | 0.373652  | H | 4.175865  | 1.850545  | 0.417843  |
| H | 2.192031  | 2.953411  | -0.394669 | H | 2.159893  | 2.917505  | -0.522511 |
| H | 1.598653  | 2.441206  | 1.167238  | H | 1.389682  | 2.474717  | 0.984221  |
| H | -0.346658 | 2.950579  | -0.127939 | H | -0.369483 | 2.930675  | -0.606283 |
| H | 0.228871  | 2.064538  | -1.532139 | H | 0.352883  | 1.902039  | -1.831660 |
| H | -0.367212 | 0.769260  | 1.154904  | H | -0.557243 | 0.854186  | 0.873367  |
| H | 0.137287  | -0.385172 | -1.609467 | H | 0.138635  | -0.610424 | -1.685565 |
| H | -0.170261 | -1.929028 | 0.994863  | H | -0.515552 | -1.575582 | 1.127027  |
| H | 0.091213  | -2.609135 | -0.592072 | H | 0.045500  | -2.624651 | -0.158475 |
| H | -2.065036 | -1.859193 | -1.417862 | H | -1.843182 | -2.105912 | -1.578608 |
| H | -2.302911 | -2.753268 | 0.073283  | H | -2.435897 | -2.657369 | -0.020692 |
| H | -1.972865 | 0.578862  | -1.406249 | H | -2.023114 | 0.936115  | -1.790448 |
| H | -2.793084 | 2.692045  | -0.574115 | H | -2.322017 | 2.744894  | 0.219146  |
| H | -2.845460 | 2.104238  | 1.081398  | H | -3.733501 | 2.117732  | -0.601908 |
| H | -4.671926 | 1.352162  | -1.237598 | H | -2.704352 | 1.353134  | 2.156707  |
| H | -5.093062 | 1.412018  | 0.462920  | H | -4.370224 | 1.434607  | 1.623000  |
| H | -3.131969 | 0.182538  | 2.245911  | H | -3.714223 | -0.768741 | -2.337648 |
| H | -1.622600 | -0.720719 | 2.218594  | H | -4.719617 | 0.108658  | -1.180611 |
| H | -3.162576 | -1.574564 | 2.105585  | H | -4.549099 | -1.642421 | -1.041716 |

# Molecular coordinates of 3R\*,7S\*,11S\*-1b

| Conf. A (17 %) |          |           |           | Conformer B (32 %) |          |           |           | Conformer C (51 %) |          |           |           |
|----------------|----------|-----------|-----------|--------------------|----------|-----------|-----------|--------------------|----------|-----------|-----------|
| C              | 4.739360 | 0.565502  | -1.015350 | C                  | 4.760616 | 1.050844  | -0.156084 | C                  | 5.101781 | 1.102943  | -0.050496 |
| C              | 5.286212 | -0.693044 | -0.736552 | C                  | 5.245445 | -0.097411 | -0.794487 | C                  | 5.866753 | -0.058177 | 0.113870  |

|   |           |           |           |   |           |           |           |   |           |           |           |
|---|-----------|-----------|-----------|---|-----------|-----------|-----------|---|-----------|-----------|-----------|
| C | 4.587864  | -1.577769 | 0.086922  | C | 4.562721  | -1.305776 | -0.644990 | C | 5.232009  | -1.301312 | 0.128729  |
| C | 3.353764  | -1.224220 | 0.638283  | C | 3.394400  | -1.382567 | 0.117403  | C | 3.845802  | -1.403039 | -0.012036 |
| C | 2.818989  | 0.043336  | 0.353409  | C | 2.902704  | -0.216229 | 0.727784  | C | 3.089296  | -0.229722 | -0.165458 |
| C | 3.504916  | 0.947939  | -0.474883 | C | 3.589800  | 1.004993  | 0.611535  | C | 3.709739  | 1.030919  | -0.190073 |
| C | 2.599151  | -2.184368 | 1.532171  | C | 2.676732  | -2.700976 | 0.311427  | C | 3.161305  | -2.751969 | 0.000242  |
| C | 1.130631  | -1.768071 | 1.663581  | C | 1.730206  | -2.628312 | 1.512890  | C | 1.749421  | -2.659371 | -0.584479 |
| C | 0.998942  | -0.261573 | 1.938580  | C | 0.878080  | -1.345285 | 1.495060  | C | 0.979012  | -1.446762 | -0.027870 |
| O | 1.592480  | 0.466440  | 0.834776  | O | 1.761521  | -0.195939 | 1.507439  | O | 1.716792  | -0.236137 | -0.340622 |
| C | -1.106568 | 2.015589  | -0.380380 | C | -3.037612 | -1.896615 | 0.388584  | C | -2.948028 | -1.879373 | 0.794763  |
| C | -1.719056 | 0.647852  | -0.139920 | C | -2.428940 | -0.512763 | 0.224659  | C | -2.477689 | -0.502353 | 0.353159  |
| C | -1.452623 | -0.152405 | 0.931878  | C | -1.091151 | -0.248513 | 0.143478  | C | -1.341286 | -0.252737 | -0.362387 |
| C | -0.472046 | 0.235147  | 2.027458  | C | -0.030577 | -1.327879 | 0.222863  | C | -0.375696 | -1.345479 | -0.782338 |
| C | 2.916959  | 2.303199  | -0.778885 | C | 3.084912  | 2.236726  | 1.322035  | C | 2.888401  | 2.283121  | -0.370187 |
| O | 6.488645  | -1.144274 | -1.222839 | O | 6.379052  | -0.137504 | -1.568630 | O | 7.232157  | -0.076666 | 0.260462  |
| C | 7.237119  | -0.288642 | -2.073658 | C | 7.122656  | 1.059732  | -1.740202 | C | 7.929865  | 1.159660  | 0.244975  |
| C | -1.972954 | 3.254786  | 0.014753  | C | -3.464464 | -2.686655 | -0.891678 | C | -3.953956 | -2.656586 | -0.116586 |
| C | -1.314695 | 4.515617  | -0.574151 | C | -2.271224 | -3.130837 | -1.740468 | C | -3.327518 | -3.113050 | -1.436057 |
| O | -3.310357 | 3.145692  | -0.487923 | O | -4.055692 | -3.924020 | -0.436158 | O | -4.267738 | -3.887919 | 0.571556  |
| C | -2.125517 | 3.402131  | 1.532840  | C | -4.480569 | -1.930100 | -1.755855 | C | -5.250880 | -1.882867 | -0.382516 |
| C | -2.646475 | 0.176241  | -1.222982 | C | -3.424617 | 0.616667  | 0.246062  | C | -3.325219 | 0.639404  | 0.850093  |
| C | -3.063518 | -1.279514 | -1.179197 | C | -2.860746 | 2.024580  | 0.334775  | C | -2.769417 | 2.038806  | 0.650558  |
| C | -3.438807 | -1.625082 | 0.296415  | C | -1.606371 | 2.134859  | -0.582917 | C | -2.124025 | 2.135778  | -0.764383 |
| C | -2.188237 | -1.469886 | 1.166963  | C | -0.544014 | 1.156258  | -0.075980 | C | -0.960615 | 1.143918  | -0.837654 |
| C | -4.327228 | -1.958255 | -1.958464 | C | -3.742303 | 3.194227  | -0.148535 | C | -3.758633 | 3.222049  | 0.659158  |
| C | -4.822369 | -2.975405 | -1.209929 | C | -2.710744 | 4.319654  | -0.485640 | C | -3.011941 | 4.334682  | -0.146216 |
| C | -4.040014 | -3.038645 | 0.141973  | C | -1.299287 | 3.646506  | -0.510512 | C | -1.802676 | 3.643446  | -0.857187 |
| C | -4.553790 | -0.693551 | 0.844070  | C | -1.933573 | 1.797737  | -2.062640 | C | -3.138669 | 1.806263  | -1.892130 |
| C | -1.861722 | -2.098906 | -1.733659 | C | -2.553788 | 2.254108  | 1.844813  | C | -1.757191 | 2.256011  | 1.814812  |
| O | -2.996380 | 0.923108  | -2.138693 | O | -4.633149 | 0.403292  | 0.291346  | O | -4.362997 | 0.440640  | 1.475589  |
| C | 1.715599  | 0.151225  | 3.237280  | C | 0.063727  | -1.227982 | 2.782140  | C | 0.789922  | -1.532637 | 1.492775  |
| H | 5.261077  | 1.269676  | -1.653341 | H | 5.284372  | 1.996389  | -0.238619 | H | 5.570907  | 2.079988  | -0.072188 |
| H | 5.018942  | -2.554121 | 0.289869  | H | 4.963003  | -2.195000 | -1.123858 | H | 5.837245  | -2.195924 | 0.245489  |
| H | 2.663228  | -3.199751 | 1.124757  | H | 2.120693  | -2.967755 | -0.597492 | H | 3.754713  | -3.475097 | -0.570659 |
| H | 3.073016  | -2.225099 | 2.522210  | H | 3.409719  | -3.501708 | 0.460933  | H | 3.119618  | -3.139037 | 1.027371  |
| H | 0.614605  | -1.991354 | 0.724658  | H | 1.074429  | -3.504779 | 1.548889  | H | 1.807652  | -2.553103 | -1.674746 |
| H | 0.634829  | -2.336559 | 2.458146  | H | 2.315537  | -2.622847 | 2.440429  | H | 1.186843  | -3.575867 | -1.892130 |
| H | -0.142993 | 2.090883  | 0.124336  | H | -2.369865 | -2.554465 | 0.950919  | H | -2.100572 | -2.548368 | 0.961676  |
| H | -0.899074 | 2.098074  | -1.453544 | H | -3.943926 | -1.778501 | 0.992492  | H | -3.444848 | -1.754068 | 1.763038  |
| H | -0.862621 | -0.137359 | 2.982391  | H | 0.624352  | -1.224837 | -0.650762 | H | -0.132323 | -1.208935 | -1.843497 |
| H | -0.418649 | 1.320711  | 2.121128  | H | -0.484770 | -2.315805 | 0.154175  | H | -0.846525 | -2.323652 | -0.692293 |
| H | 3.611295  | 2.903618  | -1.372963 | H | 2.098154  | 2.538060  | 0.954286  | H | 3.528401  | 3.169672  | -0.380475 |
| H | 1.978391  | 2.215327  | -1.337075 | H | 2.977181  | 2.057431  | 2.397466  | H | 2.321589  | 2.257773  | -1.307467 |
| H | 2.685938  | 2.851663  | 0.140870  | H | 3.771713  | 3.075583  | 1.179346  | H | 2.157428  | 2.399280  | 0.438140  |
| H | 8.138152  | -0.844177 | -2.337852 | H | 7.966153  | 0.798123  | -2.380775 | H | 8.983847  | 0.909420  | 0.374502  |
| H | 6.681259  | -0.043570 | -2.988139 | H | 6.524076  | 1.839083  | -2.229862 | H | 7.797048  | 1.685170  | -0.799852 |
| H | 7.521411  | 0.640141  | -1.561887 | H | 7.499954  | 1.440406  | -0.781990 | H | 7.609348  | 1.813528  | 1.066673  |
| H | -1.270654 | 4.448767  | -1.666610 | H | -1.611852 | -3.787536 | -1.164736 | H | -2.481608 | -3.781996 | -1.250308 |
| H | -1.906453 | 5.398227  | -0.312544 | H | -2.626623 | -3.693212 | -2.609110 | H | -4.067114 | -3.665894 | -2.022961 |
| H | -0.294836 | 4.654481  | -0.196103 | H | -1.696844 | -2.270691 | -2.096101 | H | -2.984637 | -2.259109 | -2.027287 |
| H | -3.289680 | 2.641391  | -1.320005 | H | -4.884598 | -3.718262 | 0.018180  | H | -4.769620 | -3.672953 | 1.370173  |
| H | -2.570271 | 2.503354  | 1.969901  | H | -5.347069 | -1.615628 | -1.167125 | H | -5.718797 | -1.558110 | 0.551214  |
| H | -1.161313 | 3.596667  | 2.015223  | H | -4.043003 | -1.026307 | -2.190747 | H | -5.066766 | -0.984095 | -0.978965 |
| H | -2.792992 | 4.242542  | 1.746999  | H | -4.813254 | -2.579661 | -2.571702 | H | -5.946344 | -2.525184 | -0.932054 |
| H | -1.503305 | -2.310208 | 0.994125  | H | -0.098617 | 1.509747  | 0.862529  | H | -0.103633 | 1.493051  | -0.249817 |
| H | -2.452570 | -1.528276 | 2.231891  | H | 0.297017  | 1.092792  | -0.778737 | H | -0.578553 | 1.063187  | -1.863821 |
| H | -5.075951 | -0.899992 | -1.933697 | H | -4.323808 | 2.904813  | -1.027994 | H | -4.701554 | 2.943294  | 0.181083  |
| H | -4.111493 | -1.886058 | -3.013303 | H | -4.464406 | 3.502583  | 0.612084  | H | -4.008686 | 3.537499  | 1.675585  |
| H | -4.642490 | -3.877393 | -1.803139 | H | -2.743216 | 5.122977  | 0.256975  | H | -2.666261 | 5.137312  | 0.512727  |
| H | -5.902202 | -2.930091 | -1.038712 | H | -2.943464 | 4.782876  | -1.449466 | H | -3.682309 | 4.802365  | -0.873966 |
| H | -3.249418 | -3.796247 | 0.098970  | H | -0.736826 | 3.887042  | 0.398282  | H | -0.863828 | 3.873725  | -0.342039 |
| H | -4.686845 | -3.304203 | 0.985228  | H | -0.691780 | 3.984765  | -1.356970 | H | -1.683829 | 3.976586  | -1.893988 |
| H | -4.271424 | 0.362288  | 0.843890  | H | -2.303336 | 0.777882  | -2.194832 | H | -3.532363 | 0.788892  | -1.825981 |
| H | -5.482346 | -0.785445 | 0.275486  | H | -2.676008 | 2.477124  | -2.488335 | H | -3.990047 | 2.491309  | -1.897803 |
| H | -4.778086 | -0.979608 | 1.878183  | H | -1.020504 | 1.898252  | -2.660472 | H | -2.636651 | 1.903717  | -2.861545 |
| H | -1.686344 | -1.803206 | -2.773081 | H | -3.489561 | 2.169444  | 2.406336  | H | -2.295700 | 2.174115  | 2.764341  |
| H | -0.933649 | -1.929995 | -1.183197 | H | -1.851806 | 1.526413  | 2.257846  | H | -0.948262 | 1.522038  | 1.825637  |
| H | -2.076511 | -3.171188 | -1.728822 | H | -2.150491 | 3.254807  | 2.022613  | H | -1.311121 | 3.253517  | 1.773082  |
| H | 1.544366  | 1.212312  | 3.441302  | H | -0.470071 | -0.275763 | 2.825012  | H | 0.195062  | -0.691194 | 1.855583  |
| H | 1.342864  | -0.429798 | 4.087850  | H | -0.672380 | -2.035355 | 2.845153  | H | 0.274381  | -2.459219 | 1.766514  |
| H | 2.794501  | -0.004098 | 3.162644  | H | 0.725760  | -1.289061 | 3.650655  | H | 1.752944  | -1.512391 | 2.009153  |

# Molecular coordinates of 3S\*,7S\*,11R\*-1b

| Conf A (7 %)                    | Conf B (44 %)                   | Conf C (49 %)                   |
|---------------------------------|---------------------------------|---------------------------------|
| C -5.884446 -0.131072 0.819251  | C -4.873839 1.055504 -0.211755  | C -4.753279 0.630121 -0.970628  |
| C -6.122309 -0.230864 -0.557411 | C -5.332161 -0.110142 -0.838059 | C -5.285887 -0.655047 -0.811996 |

|   |           |           |           |   |           |           |           |   |           |           |           |
|---|-----------|-----------|-----------|---|-----------|-----------|-----------|---|-----------|-----------|-----------|
| C | -5.042255 | -0.319820 | -1.437649 | C | -4.619101 | -1.299803 | -0.680353 | C | -4.579472 | -1.603952 | -0.071071 |
| C | -3.727440 | -0.316059 | -0.964678 | C | -3.447098 | -1.340821 | 0.079021  | C | -3.350837 | -1.288801 | 0.514524  |
| C | -3.505017 | -0.225789 | 0.419296  | C | -2.983407 | -0.157581 | 0.678654  | C | -2.829327 | 0.004870  | 0.349227  |
| C | -4.577192 | -0.128617 | 1.322129  | C | -3.699904 | -0.545509 | 0.552398  | C | -3.524447 | 0.974832  | 0.393063  |
| C | -2.553783 | -0.404855 | -1.916575 | C | -2.694594 | -2.638244 | 0.281127  | C | -2.590113 | -2.316881 | 1.322681  |
| C | -1.258116 | 0.044442  | -1.232246 | C | -1.753175 | -2.532451 | 1.483943  | C | -1.127240 | -1.900290 | 1.508594  |
| C | -1.107797 | -0.590418 | 0.159850  | C | -0.928737 | -1.232060 | 1.451192  | C | -1.010961 | -0.421418 | 1.911134  |
| O | -2.241578 | -0.190463 | 0.977356  | O | -1.840886 | -0.102538 | 1.455286  | O | -1.607332 | 0.393009  | 0.870027  |
| C | 1.690259  | 2.026693  | -0.725290 | C | 2.935145  | -1.924478 | 0.470867  | C | 1.042059  | 1.977650  | -0.289525 |
| C | 2.212568  | 0.683470  | -0.254216 | C | 2.410227  | -0.528341 | 0.183793  | C | 1.748568  | 0.657099  | -0.058002 |
| C | 1.503269  | -0.234856 | 0.462411  | C | 1.091494  | -0.187268 | 0.104938  | C | 1.462028  | -0.216627 | 0.947294  |
| C | 0.087526  | 0.008081  | 0.960156  | C | -0.030393 | -1.204670 | 0.169643  | C | 0.455172  | 0.079770  | 2.047681  |
| C | -4.313042 | -0.017372 | 2.803109  | C | -3.222103 | 2.296864  | 1.247391  | C | -2.953278 | 2.359656  | -0.568760 |
| O | -7.370038 | -0.244035 | -1.132254 | O | -6.467001 | -0.185320 | -1.607836 | O | -6.481772 | -1.072920 | -1.342407 |
| C | -8.504763 | -0.145795 | -0.284985 | C | -7.241388 | 0.991184  | -1.786291 | C | -7.235688 | -0.151998 | -2.116684 |
| C | -2.241578 | -0.190463 | 0.977356  | C | 3.426469  | -2.798973 | -0.725298 | C | 1.836097  | 3.265406  | 0.086502  |
| C | 1.692950  | 3.329809  | 1.482955  | C | 4.562026  | -2.143205 | -1.521636 | C | 2.053365  | 3.391690  | 1.597776  |
| O | 3.644221  | 3.256474  | 0.166830  | O | 3.897096  | -4.045352 | -0.166442 | O | 3.157296  | 3.250805  | -0.477487 |
| C | 1.790049  | 4.543511  | -0.723797 | C | 2.287135  | -3.210043 | -1.660291 | C | 1.073281  | 4.490744  | -0.445683 |
| C | 3.618652  | 0.380638  | -0.699074 | C | 3.469071  | 0.540486  | 0.096548  | C | 2.792753  | 0.315079  | -0.085538 |
| C | 4.327270  | -0.742031 | 0.029082  | C | 3.032107  | 1.859417  | -0.517783 | C | 3.758391  | -0.793770 | -0.720045 |
| C | 3.352581  | -1.959156 | 0.107274  | C | 1.706946  | 2.288487  | 0.190004  | C | 2.932574  | -1.990560 | -0.151393 |
| C | 2.120753  | -1.553824 | 0.921028  | C | 0.622922  | 1.247002  | -0.104974 | C | 2.215577  | -1.532757 | 1.122033  |
| C | 5.586998  | -1.353855 | -0.613966 | C | 3.938593  | 3.089167  | -0.317864 | C | 4.580522  | -1.450529 | -1.846048 |
| C | 5.653771  | -2.792655 | -0.005900 | C | 2.958056  | 4.300930  | -0.437318 | C | 4.922317  | -2.867340 | -1.280240 |
| C | 4.273513  | -3.058500 | 0.678817  | C | 1.509506  | 3.718515  | -0.358092 | C | 4.015676  | -3.083321 | -0.024902 |
| C | 2.888697  | -2.419091 | -1.300858 | C | 1.887755  | 2.396334  | 1.728055  | C | 1.872636  | -2.493069 | -1.167997 |
| C | 4.724099  | -0.166876 | 1.421155  | C | 2.870373  | 1.620936  | -2.046155 | C | 4.752921  | -0.174298 | 0.306326  |
| O | 4.165511  | 1.043789  | -1.579904 | O | 4.616007  | 0.339652  | 0.483870  | O | 2.879906  | 0.940431  | -2.142043 |
| C | -1.094653 | -2.124545 | 0.095552  | C | -0.115686 | -1.080747 | 2.735041  | C | -1.738266 | -0.125989 | 3.235400  |
| H | -6.706300 | -0.054996 | 1.522095  | H | -5.420757 | 1.987169  | -0.301572 | H | -5.281929 | 1.384675  | -1.541831 |
| H | -5.240994 | -0.385125 | -2.503734 | H | -4.998390 | -2.202852 | -1.150348 | H | -4.999888 | -2.599550 | 0.039936  |
| H | -2.742612 | 0.218142  | -2.798143 | H | -2.128545 | -2.893242 | -0.625089 | H | -2.637897 | -3.291500 | 0.823675  |
| H | -2.450286 | -1.432702 | -2.289957 | H | -3.405623 | -3.458128 | 0.432569  | H | -3.072930 | -2.453565 | 2.299843  |
| H | -1.280907 | 1.132602  | -1.108157 | H | -1.078003 | -3.393556 | 1.530782  | H | -0.590438 | -2.042911 | 0.565804  |
| H | -0.386027 | -0.196564 | -1.848353 | H | -2.340514 | -2.529591 | 2.410222  | H | -0.644701 | -2.529398 | 2.264678  |
| H | 0.601076  | 2.057041  | -0.698576 | H | 2.194415  | -2.520311 | 1.009315  | H | 0.084672  | 1.992863  | 0.230768  |
| H | 1.979530  | 2.140504  | -1.776684 | H | 3.792400  | -1.803485 | 1.143585  | H | 0.812782  | 2.036485  | -1.360382 |
| H | 0.007630  | -0.406468 | 1.973467  | H | -0.692650 | -1.023392 | -0.686772 | H | 0.842206  | -0.362003 | 2.975454  |
| H | -0.110734 | 1.076927  | 1.053176  | H | 0.368191  | -2.210896 | 0.040212  | H | 0.394444  | 1.155750  | 2.223957  |
| H | -5.250819 | 0.029172  | 3.363622  | H | -3.935609 | 3.113811  | 1.108739  | H | -2.023252 | 2.337771  | -1.147345 |
| H | -3.732310 | -0.872145 | 3.168842  | H | -3.092978 | 2.128936  | 2.322146  | H | -3.662193 | 3.008864  | -1.089862 |
| H | -3.727206 | 0.878914  | 3.036795  | H | -2.250594 | 2.626825  | 0.862670  | H | -2.712867 | 2.815997  | 0.397656  |
| H | -9.373393 | -0.173465 | -0.944604 | H | -8.080469 | 0.702914  | -2.421202 | H | -8.128986 | -0.691116 | -2.435559 |
| H | -8.557026 | -0.987608 | 0.417985  | H | -7.624481 | 1.370198  | -0.829719 | H | -7.533288 | 0.723482  | -1.524743 |
| H | -8.507079 | 0.797055  | 0.277639  | H | -6.664687 | 1.781331  | -2.284833 | H | -6.678028 | 0.180997  | -1.001814 |
| H | 1.967591  | 2.422675  | 2.028841  | H | 5.385016  | -1.841544 | -0.866263 | H | 2.572423  | 2.512840  | 1.991420  |
| H | 2.138241  | 4.184076  | 2.001807  | H | 4.937751  | -2.853301 | -2.264933 | H | 2.672906  | 4.269696  | 1.804868  |
| H | 0.603830  | 3.441144  | 1.506155  | H | 4.217946  | -1.247224 | -2.047212 | H | 1.100911  | 3.509358  | 2.125548  |
| H | 4.024709  | 2.942512  | -0.668345 | H | 4.679776  | -3.863961 | 0.372476  | H | 3.112121  | 2.863001  | -1.365661 |
| H | 2.218504  | 4.543450  | -1.732329 | H | 1.541266  | -3.800723 | -1.119615 | H | 0.976520  | 4.438967  | -1.535877 |
| H | 0.699791  | 4.612347  | -0.816144 | H | 1.799687  | -2.333050 | -2.096167 | H | 0.066844  | 4.556451  | -0.016234 |
| H | 2.151300  | 5.434171  | -0.200804 | H | 2.678903  | -3.829685 | -2.472549 | H | 1.619432  | 5.405694  | -0.196203 |
| H | 2.383538  | -1.442000 | 1.984002  | H | 0.268273  | 1.338531  | -1.143255 | H | 2.939198  | -1.396459 | 1.940555  |
| H | 1.365715  | -2.344747 | 0.896695  | H | -0.262566 | 1.413014  | 0.516889  | H | 1.526563  | -2.306655 | 1.477498  |
| H | 5.494016  | -1.379281 | -1.702822 | H | 4.423474  | 3.055860  | 0.660991  | H | 3.996020  | -1.513596 | -2.767521 |
| H | 6.482015  | -0.765970 | -0.393237 | H | 4.741558  | 3.128503  | -1.059440 | H | 5.475664  | -0.870493 | -2.086220 |
| H | 6.468079  | -2.879335 | 0.720005  | H | 3.106538  | 4.841097  | -1.377596 | H | 5.980215  | -2.942501 | -1.010287 |
| H | 5.856341  | -3.534067 | -0.784955 | H | 3.136603  | 5.024694  | 0.363926  | H | 4.741724  | -3.639963 | -2.033968 |
| H | 4.354826  | -2.969881 | 1.767677  | H | 1.043819  | 3.694040  | -1.349541 | H | 4.591422  | -2.955167 | 0.898353  |
| H | 3.892073  | -4.064217 | 0.470929  | H | 0.854377  | 4.317774  | 0.283638  | H | 3.583494  | -4.089522 | 0.008635  |
| H | 2.342281  | -1.642222 | -1.842869 | H | 2.191177  | 1.451625  | 2.187344  | H | 1.135137  | -1.728230 | -1.426099 |
| H | 3.725124  | -2.732882 | -1.929652 | H | 2.630434  | 3.148288  | 2.005092  | H | 2.326439  | -2.841270 | -2.098726 |
| H | 2.222469  | -3.282722 | -1.193516 | H | 0.935282  | 2.695366  | 2.179336  | H | 1.334271  | -3.342873 | -0.732975 |
| H | 5.404692  | 0.676658  | 1.272835  | H | 3.841048  | 1.334016  | -2.464331 | H | 5.282555  | 0.654452  | -0.172842 |
| H | 3.872081  | 0.203719  | 1.994449  | H | 2.156660  | 0.830091  | -2.287530 | H | 4.262184  | 0.227478  | 1.195081  |
| H | 5.247010  | -0.916490 | 2.021407  | H | 2.553959  | 2.534062  | -2.557884 | H | 5.498969  | -0.908323 | 0.623344  |
| H | -0.314798 | -2.487950 | -0.580238 | H | 0.641894  | -1.867300 | 2.804188  | H | -1.363057 | -0.771632 | 4.036900  |
| H | -0.929257 | -2.547479 | 1.090550  | H | 0.390917  | -0.113717 | 2.767106  | H | -1.580337 | 0.916368  | 3.528024  |
| H | -2.054613 | -2.501197 | -0.266372 | H | -0.774674 | -1.152771 | 3.605114  | H | -2.814967 | -0.286677 | 3.141833  |

## **10. Z-matrices and CSA tensors**



## Chemical Shielding tensors (GIAO MPW1PW91/6-311+G(2d,p) IEFPCM = DMSO)

### Estrone

1 O Isotropic = 219.3777 Anisotropy = 69.4458  
XX= 264.3507 YX= 6.1033 ZX= 6.2852  
XY= 12.2448 YY= 170.4594 ZY= -7.2555  
XZ= 3.9257 YZ= -9.9186 ZZ= 223.3230  
Eigenvalues: 168.0872 224.3710 265.6749  
2 C Isotropic = 55.5022 Anisotropy = 179.1153  
XX= 29.1776 YX= -27.7221 ZX= -23.6955  
XY= -30.9760 YY= -27.9407 ZY= -33.8073  
XZ= -32.6648 YZ= -35.0210 ZZ= 165.2695  
Eigenvalues: -48.9020 40.4961 174.9124  
3 C Isotropic = 72.1356 Anisotropy = 143.6624  
XX= 40.8995 YX= 39.4558 ZX= -10.4471  
XY= 32.4091 YY= 12.5237 ZY= -19.7790  
XZ= -13.1783 YZ= -20.6942 ZZ= 162.9836  
Eigenvalues: -12.5199 61.0162 167.9105  
4 C Isotropic = 27.0705 Anisotropy = 137.4049  
XX= -56.8698 YX= -7.7226 ZX= -23.6249  
XY= -0.9178 YY= 24.7752 ZY= -14.2821  
XZ= -21.8941 YZ= -16.9502 ZZ= 113.3061  
Eigenvalues: -60.3372 22.8750 118.6738  
5 C Isotropic = 69.6497 Anisotropy = 118.6949  
XX= 53.6038 YX= -35.9296 ZX= -16.7127  
XY= -23.9319 YY= 12.0392 ZY= -23.6663  
XZ= -9.9121 YZ= -27.5945 ZZ= 143.3061  
Eigenvalues: -9.0903 69.2598 148.7797  
6 C Isotropic = 42.3351 Anisotropy = 190.2369  
XX= -6.0309 YX= 29.9459 ZX= -17.0315  
XY= 29.6588 YY= -30.6512 ZY= -24.9716  
XZ= -21.3428 YZ= -19.7424 ZZ= 163.6875  
Eigenvalues: -50.8957 8.7413 169.1597  
7 C Isotropic = 154.4653 Anisotropy = 21.4980  
XX= 165.2293 YX= -1.9551 ZX= 4.6945  
XY= -12.0906 YY= 154.6523 ZY= -2.4769  
XZ= -1.5831 YZ= 2.9717 ZZ= 143.5144  
Eigenvalues: 143.3423 151.2564 168.7973  
8 C Isotropic = 158.4953 Anisotropy = 15.8645  
XX= 156.3619 YX= 9.7357 ZX= -0.4150  
XY= 8.9868 YY= 161.2069 ZY= -3.5179  
XZ= -2.9486 YZ= -0.5169 ZZ= 157.9173  
Eigenvalues: 149.1137 157.3006 169.0717  
9 C Isotropic = 146.3761 Anisotropy = 5.6182  
XX= 147.2654 YX= -5.7378 ZX= -0.2149  
XY= 2.3441 YY= 144.2578 ZY= -0.8822  
XZ= 5.1363 YZ= 1.0312 ZZ= 147.6051  
Eigenvalues: 143.1569 145.8498 150.1216  
10 C Isotropic = 139.8903 Anisotropy = 9.4644  
XX= 136.5159 YX= -10.9680 ZX= -5.2087  
XY= -5.2012 YY= 137.2817 ZY= -0.9415  
XZ= 1.9661 YZ= -2.4578 ZZ= 145.8732  
Eigenvalues: 128.4885 144.9824 146.1999  
11 C Isotropic = 49.8868 Anisotropy = 178.9526  
XX= -34.1737 YX= 0.4171 ZX= -26.8724  
XY= 0.3017 YY= 22.3495 ZY= -21.5554  
XZ= -22.7921 YZ= -30.7402 ZZ= 161.4845

### Epi-estrone

1 O Isotropic = 219.1218 Anisotropy = 68.6206  
XX= 262.8605 YX= 5.5215 ZX= 8.1459  
XY= 12.5506 YY= 168.9205 ZY= -4.3697  
XZ= 6.3472 YZ= -6.9293 ZZ= 225.5845  
Eigenvalues: 167.3695 225.1272 264.8689  
2 C Isotropic = 54.2114 Anisotropy = 180.2708  
XX= 30.4358 YX= -27.5152 ZX= -30.4681  
XY= -33.7173 YY= -31.3731 ZY= -28.1925  
XZ= -40.3256 YZ= -27.9392 ZZ= 163.5714  
Eigenvalues: -51.3790 39.6213 174.3919  
3 C Isotropic = 71.6545 Anisotropy = 143.7996  
XX= 42.7894 YX= 39.4362 ZX= -19.4700  
XY= 32.2913 YY= 10.4966 ZY= -11.9778  
XZ= -22.0020 YZ= -13.5968 ZZ= 161.6775  
Eigenvalues: -12.6895 60.1320 167.5209  
4 C Isotropic = 26.9623 Anisotropy = 136.6782  
XX= -53.7130 YX= -8.1564 ZX= -33.5992  
XY= -1.3582 YY= 23.4315 ZY= -10.1986  
XZ= -28.9755 YZ= -12.9645 ZZ= 111.1682  
Eigenvalues: -60.0035 22.8093 118.0811  
5 C Isotropic = 69.8476 Anisotropy = 118.4808  
XX= 55.1518 YX= -35.5076 ZX= -20.3520  
XY= -23.7943 YY= 10.5273 ZY= -18.5356  
XZ= -14.2173 YZ= -22.7220 ZZ= 143.8635  
Eigenvalues: -8.7722 69.4801 148.8348  
6 C Isotropic = 41.6112 Anisotropy = 189.0193  
XX= -3.3718 YX= 29.3149 ZX= -29.3030  
XY= 27.8971 YY= -32.4636 ZY= -11.6130  
XZ= -33.4410 YZ= -8.5001 ZZ= 160.6690  
Eigenvalues: -50.3238 7.5333 167.6240  
7 C Isotropic = 154.0016 Anisotropy = 20.3842  
XX= 164.2516 YX= -1.0015 ZX= 6.4842  
XY= -10.9245 YY= 153.5705 ZY= -4.4887  
XZ= 0.8051 YZ= 1.3135 ZZ= 144.1827  
Eigenvalues: 143.5074 150.9063 167.5910  
8 C Isotropic = 157.1621 Anisotropy = 18.1057  
XX= 157.8645 YX= 10.0127 ZX= 1.0085  
XY= 11.9426 YY= 156.7962 ZY= -5.6196  
XZ= -2.3280 YZ= -2.6367 ZZ= 156.8258  
Eigenvalues: 145.7340 156.5198 169.2326  
9 C Isotropic = 143.4547 Anisotropy = 10.0813  
XX= 137.7080 YX= -5.2846 ZX= -1.7386  
XY= 6.2750 YY= 144.1310 ZY= 3.0805  
XZ= 4.5136 YZ= 2.8138 ZZ= 148.5251  
Eigenvalues: 137.5303 142.6582 150.1755  
10 C Isotropic = 142.8259 Anisotropy = 11.4853  
XX= 140.8036 YX= -7.8023 ZX= -1.3181  
XY= 5.6449 YY= 138.4621 ZY= -2.2079  
XZ= 7.0919 YZ= -1.5654 ZZ= 149.2119  
Eigenvalues: 137.9762 140.0187 150.4827  
11 C Isotropic = 50.3027 Anisotropy = 178.0889  
XX= -30.2915 YX= 1.5943 ZX= -37.4921  
XY= 0.0226 YY= 21.9711 ZY= -15.3631  
XZ= -34.6645 YZ= -28.1997 ZZ= 159.2285

Eigenvalues: -37.4236 17.8954 169.1885  
 12 C Isotropic = 158.9744 Anisotropy = 18.5406  
 XX= 163.8741 YX= 7.6743 ZX= -0.3198  
 XY= 6.2254 YY= 161.6656 ZY= -7.5718  
 XZ= 1.1586 YZ= -9.1687 ZZ= 151.3835  
 Eigenvalues: 145.8380 159.7504 171.3348  
 13 C Isotropic = 153.3058 Anisotropy = 19.0065  
 XX= 150.3836 YX= -7.5000 ZX= -8.3517  
 XY= -1.8735 YY= 157.0259 ZY= 9.9132  
 XZ= -5.8230 YZ= 3.4093 ZZ= 152.5080  
 Eigenvalues: 144.2026 149.7381 165.9768  
 14 C Isotropic = 133.4149 Anisotropy = 22.5557  
 XX= 145.3260 YX= -15.0578 ZX= -6.1606  
 XY= -2.4098 YY= 123.8874 ZY= -1.0673  
 XZ= 5.2212 YZ= -4.9176 ZZ= 131.0312  
 Eigenvalues: 119.9773 131.8153 148.4520  
 15 C Isotropic = 134.4845 Anisotropy = 22.0671  
 XX= 149.1363 YX= 5.6068 ZX= 4.3386  
 XY= -5.9093 YY= 135.9540 ZY= 2.0670  
 XZ= -6.8931 YZ= 4.7241 ZZ= 118.3631  
 Eigenvalues: 117.6824 136.5751 149.1959  
 16 C Isotropic = 163.3058 Anisotropy = 24.2785  
 XX= 176.7016 YX= -9.1957 ZX= 1.3687  
 XY= -4.5847 YY= 162.1465 ZY= 3.5849  
 XZ= 3.7949 YZ= 3.3213 ZZ= 151.0694  
 Eigenvalues: 149.3102 161.1158 179.4915  
 17 C Isotropic = 147.4763 Anisotropy = 35.9089  
 XX= 143.1726 YX= -0.6513 ZX= 6.5327  
 XY= -2.6572 YY= 171.2367 ZY= 0.6870  
 XZ= -0.5817 YZ= 3.4200 ZZ= 128.0195  
 Eigenvalues: 127.3328 143.6805 171.4156  
 18 C Isotropic = -47.0653 Anisotropy = 175.0531  
 XX= -81.9312 YX= 9.3170 ZX= -41.7944  
 XY= 2.8263 YY= -118.7044 ZY= -2.9491  
 XZ= -36.6070 YZ= -0.5412 ZZ= 59.4397  
 Eigenvalues: -119.8255 -91.0071 69.6368  
 19 C Isotropic = 173.2513 Anisotropy = 23.9976  
 XX= 162.8696 YX= 7.5602 ZX= -4.0048  
 XY= 8.6510 YY= 169.7931 ZY= -5.4967  
 XZ= -3.6792 YZ= -2.5588 ZZ= 187.0913  
 Eigenvalues: 157.4826 173.0218 189.2497  
 20 O Isotropic = -232.6820 Anisotropy = 901.0914  
 XX= -475.3962 YX= -182.2073 ZX= -235.6484  
 XY= -181.2861 YY= -520.3551 ZY= -61.6810  
 XZ= -250.0246 YZ= -80.9610 ZZ= 297.7054  
 Eigenvalues: -727.7796 -338.3119 368.0456  
 21 H Isotropic = 27.4625 Anisotropy = 13.4963  
 XX= 29.6081 YX= 5.4469 ZX= 2.1659  
 XY= 2.8061 YY= 32.9926 ZY= 2.5738  
 XZ= 1.9239 YZ= 2.9078 ZZ= 19.7869  
 Eigenvalues: 19.0836 26.8439 36.4601  
 22 H Isotropic = 24.2284 Anisotropy = 11.3193  
 XX= 30.6896 YX= -3.5869 ZX= -0.3416  
 XY= -2.5042 YY= 23.1360 ZY= 0.5445  
 XZ= -0.1466 YZ= 0.2416 ZZ= 18.8597  
 Eigenvalues: 18.8238 22.0869 31.7746

Eigenvalues: -37.1014 18.9809 169.0287  
 12 C Isotropic = 156.0338 Anisotropy = 13.5188  
 XX= 158.4355 YX= 6.7478 ZX= -0.8131  
 XY= 4.7529 YY= 157.5489 ZY= -5.8385  
 XZ= -2.1190 YZ= -2.8278 ZZ= 152.1169  
 Eigenvalues: 149.3421 153.7129 165.0463  
 13 C Isotropic = 152.6552 Anisotropy = 27.6541  
 XX= 164.7842 YX= -5.7329 ZX= 7.8254  
 XY= -14.1986 YY= 148.5242 ZY= -0.2350  
 XZ= 7.2632 YZ= 2.2834 ZZ= 144.6572  
 Eigenvalues: 139.3826 147.4917 171.0912  
 14 C Isotropic = 129.9474 Anisotropy = 26.4540  
 XX= 135.6988 YX= -5.6551 ZX= -8.7193  
 XY= -2.0490 YY= 119.4827 ZY= 3.9376  
 XZ= -8.7045 YZ= 16.9117 ZZ= 134.6608  
 Eigenvalues: 114.1624 128.0965 147.5834  
 15 C Isotropic = 134.5288 Anisotropy = 18.9576  
 XX= 134.6859 YX= 11.2229 ZX= -10.3173  
 XY= 11.0602 YY= 136.8255 ZY= 2.5946  
 XZ= -0.3009 YZ= 2.3741 ZZ= 132.0751  
 Eigenvalues: 121.5496 134.8697 147.1672  
 16 C Isotropic = 164.1691 Anisotropy = 26.6708  
 XX= 159.8035 YX= -8.9897 ZX= -8.9244  
 XY= -4.7871 YY= 163.5529 ZY= 4.2631  
 XZ= -14.5226 YZ= 9.1473 ZZ= 169.1509  
 Eigenvalues: 151.4229 159.1347 181.9496  
 17 C Isotropic = 149.4047 Anisotropy = 42.1581  
 XX= 132.4064 YX= -3.9523 ZX= -7.7852  
 XY= -8.3139 YY= 176.5228 ZY= 5.3294  
 XZ= -0.8456 YZ= -1.6871 ZZ= 139.2849  
 Eigenvalues: 129.8301 140.8738 177.5101  
 18 C Isotropic = -48.3586 Anisotropy = 178.2581  
 XX= 45.3683 YX= 0.3121 ZX= 60.9205  
 XY= -4.1502 YY= -119.0875 ZY= -1.0566  
 XZ= 58.2626 YZ= -7.7492 ZZ= -71.3565  
 Eigenvalues: -119.6244 -95.9314 70.4802  
 19 C Isotropic = 160.4044 Anisotropy = 42.6993  
 XX= 173.4425 YX= 9.0098 ZX= 16.5146  
 XY= 10.6564 YY= 143.5015 ZY= -1.6907  
 XZ= 20.0928 YZ= -0.3945 ZZ= 164.2692  
 Eigenvalues: 138.4010 153.9416 188.8706  
 20 O Isotropic = -240.0027 Anisotropy = 921.5376  
 XX= 248.6591 YX= -63.9965 ZX= 303.6572  
 XY= -87.5573 YY= -546.7220 ZY= 173.2933  
 XZ= 329.0567 YZ= 190.9178 ZZ= -421.9452  
 Eigenvalues: -744.3979 -349.9659 374.3557  
 21 H Isotropic = 27.4674 Anisotropy = 13.5064  
 XX= 29.4233 YX= 5.4482 ZX= 2.4948  
 XY= 2.7663 YY= 33.1471 ZY= 2.0845  
 XZ= 2.4098 YZ= 2.7255 ZZ= 19.8319  
 Eigenvalues: 19.0855 26.8451 36.4717  
 22 H Isotropic = 24.2323 Anisotropy = 11.0873  
 XX= 30.3768 YX= -3.7514 ZX= 0.1905  
 XY= -2.6402 YY= 23.2861 ZY= -0.0205  
 XZ= 0.6720 YZ= -0.4794 ZZ= 19.0340  
 Eigenvalues: 19.0127 22.0604 31.6238

23 H Isotropic = 24.8253 Anisotropy = 5.3010  
 XX= 27.7307 YX= 1.5196 ZX= 0.9013  
 XY= 0.7369 YY= 25.4817 ZY= 0.7147  
 XZ= 0.7374 YZ= 0.8779 ZZ= 21.2635  
 Eigenvalues: 21.0606 25.0560 28.3593  
 24 H Isotropic = 24.9854 Anisotropy = 8.2953  
 XX= 29.6008 YX= -2.2454 ZX= 0.5686  
 XY= -2.4138 YY= 24.4702 ZY= 0.1747  
 XZ= 0.3256 YZ= 0.0364 ZZ= 20.8853  
 Eigenvalues: 20.8457 23.5949 30.5156  
 25 H Isotropic = 28.9172 Anisotropy = 9.6040  
 XX= 32.0413 YX= 3.0506 ZX= -0.6074  
 XY= 3.4750 YY= 31.1225 ZY= -1.9842  
 XZ= -0.3813 YZ= -3.6890 ZZ= 23.5878  
 Eigenvalues: 22.6009 28.8308 35.3199  
 26 H Isotropic = 28.8721 Anisotropy = 7.7042  
 XX= 29.4816 YX= -0.2970 ZX= 2.1530  
 XY= 0.7009 YY= 27.7489 ZY= 4.0443  
 XZ= 0.9085 YZ= 5.9495 ZZ= 29.3857  
 Eigenvalues: 23.3857 29.2223 34.0082  
 27 H Isotropic = 29.8462 Anisotropy = 7.8423  
 XX= 32.0831 YX= -1.1276 ZX= -0.2621  
 XY= -1.6327 YY= 34.3213 ZY= 0.9419  
 XZ= -0.3894 YZ= 1.1112 ZZ= 23.1342  
 Eigenvalues: 23.0363 31.4279 35.0744  
 28 H Isotropic = 30.4286 Anisotropy = 6.9034  
 XX= 29.5753 YX= 1.6310 ZX= 0.2641  
 XY= 1.1470 YY= 28.7423 ZY= -3.2149  
 XZ= 0.9160 YZ= -3.9740 ZZ= 32.9683  
 Eigenvalues: 26.0483 30.2067 35.0309  
 29 H Isotropic = 30.1763 Anisotropy = 4.4999  
 XX= 31.0185 YX= 2.6881 ZX= -0.2672  
 XY= 2.7416 YY= 28.4370 ZY= -0.2351  
 XZ= -2.0845 YZ= 0.4119 ZZ= 31.0735  
 Eigenvalues: 26.6073 30.7454 33.1763  
 30 H Isotropic = 29.5020 Anisotropy = 2.8006  
 XX= 29.3811 YX= 0.6778 ZX= -1.7452  
 XY= -0.2972 YY= 27.8592 ZY= 0.6154  
 XZ= 1.2112 YZ= 0.4061 ZZ= 31.2658  
 Eigenvalues: 27.7523 29.3847 31.3691  
 31 H Isotropic = 30.4056 Anisotropy = 5.6241  
 XX= 31.1737 YX= -1.1668 ZX= 1.4437  
 XY= -1.7313 YY= 29.1949 ZY= -3.5232  
 XZ= -1.0464 YZ= -3.7715 ZZ= 30.8483  
 Eigenvalues: 26.0764 30.9855 34.1550  
 32 H Isotropic = 29.4255 Anisotropy = 10.7026  
 XX= 32.0131 YX= -2.6194 ZX= -1.4321  
 XY= -3.1569 YY= 33.3985 ZY= 3.2894  
 XZ= -1.5422 YZ= 3.1976 ZZ= 22.8649  
 Eigenvalues: 21.9017 29.8142 36.5606  
 33 H Isotropic = 30.3962 Anisotropy = 8.2898  
 XX= 29.4561 YX= 0.4261 ZX= 1.7953  
 XY= 0.6344 YY= 29.0628 ZY= 4.2751  
 XZ= 1.6559 YZ= 4.1680 ZZ= 32.6696  
 Eigenvalues: 26.1879 29.0779 35.9227

23 H Isotropic = 24.8694 Anisotropy = 5.2426  
 XX= 27.6845 YX= 1.4525 ZX= 1.2144  
 XY= 0.6532 YY= 25.4785 ZY= 0.5035  
 XZ= 1.1855 YZ= 0.6928 ZZ= 21.4453  
 Eigenvalues: 21.1842 25.0596 28.3645  
 24 H Isotropic = 24.9978 Anisotropy = 8.2497  
 XX= 29.4617 YX= -2.2198 ZX= 1.2363  
 XY= -2.4129 YY= 24.4286 ZY= -0.1427  
 XZ= 1.0207 YZ= -0.2011 ZZ= 21.1032  
 Eigenvalues: 20.9472 23.5486 30.4976  
 25 H Isotropic = 28.9563 Anisotropy = 9.8057  
 XX= 32.2865 YX= 3.4326 ZX= -0.1275  
 XY= 3.6762 YY= 30.9208 ZY= -1.8985  
 XZ= 0.2118 YZ= -3.6690 ZZ= 23.6617  
 Eigenvalues: 22.5532 28.8223 35.4935  
 26 H Isotropic = 28.9688 Anisotropy = 7.4888  
 XX= 29.4053 YX= -0.4702 ZX= 1.8892  
 XY= 0.3545 YY= 28.2995 ZY= 4.0326  
 XZ= 0.7059 YZ= 5.9710 ZZ= 29.2016  
 Eigenvalues: 23.5816 29.3634 33.9613  
 27 H Isotropic = 29.6894 Anisotropy = 7.1840  
 XX= 31.9629 YX= -0.8203 ZX= -0.1664  
 XY= -1.6275 YY= 33.8829 ZY= -0.2383  
 XZ= -0.1282 YZ= 0.2200 ZZ= 23.2223  
 Eigenvalues: 23.2197 31.3697 34.4787  
 28 H Isotropic = 30.5373 Anisotropy = 6.9494  
 XX= 29.3951 YX= 2.2389 ZX= -0.6856  
 XY= 1.3122 YY= 28.3948 ZY= -2.6336  
 XZ= 0.2932 YZ= -3.0278 ZZ= 33.8219  
 Eigenvalues: 26.3640 30.0775 35.1702  
 29 H Isotropic = 30.8234 Anisotropy = 3.4058  
 XX= 32.8898 YX= 1.2100 ZX= -0.2384  
 XY= 0.2516 YY= 28.3567 ZY= 1.1537  
 XZ= -0.9251 YZ= 1.6667 ZZ= 31.2239  
 Eigenvalues: 27.6261 31.7503 33.0940  
 30 H Isotropic = 29.5236 Anisotropy = 2.8425  
 XX= 30.2860 YX= 0.5267 ZX= -1.5320  
 XY= -0.6531 YY= 27.5750 ZY= 1.4971  
 XZ= 1.5689 YZ= 1.8038 ZZ= 30.7098  
 Eigenvalues: 26.8650 30.2872 31.4186  
 31 H Isotropic = 31.0489 Anisotropy = 5.3881  
 XX= 31.1175 YX= -0.2965 ZX= 1.3140  
 XY= -0.2169 YY= 29.0017 ZY= -2.7312  
 XZ= -0.6698 YZ= -3.1894 ZZ= 33.0276  
 Eigenvalues: 27.4332 31.0726 34.6410  
 32 H Isotropic = 29.5819 Anisotropy = 10.8501  
 XX= 32.7697 YX= -3.2835 ZX= 0.2530  
 XY= -3.5723 YY= 33.9098 ZY= 0.3162  
 XZ= -0.2051 YZ= -0.0275 ZZ= 22.0663  
 Eigenvalues: 22.0641 29.8664 36.8153  
 33 H Isotropic = 30.3948 Anisotropy = 7.1724  
 XX= 30.1185 YX= -1.0531 ZX= 1.7848  
 XY= -0.4767 YY= 29.9533 ZY= 4.5628  
 XZ= 1.1809 YZ= 4.4962 ZZ= 31.1127  
 Eigenvalues: 25.4456 30.5624 35.1764

34 H Isotropic = 29.9512 Anisotropy = 9.5595  
 XX= 30.0072 YX= 2.6269 ZX= -0.7840  
 XY= 3.4236 YY= 34.7876 ZY= -0.5039  
 XZ= -1.0598 YZ= -0.5899 ZZ= 25.0587  
 Eigenvalues: 24.8926 28.6368 36.3242

35 H Isotropic = 30.2088 Anisotropy = 2.7356  
 XX= 29.8120 YX= -1.1691 ZX= 1.3515  
 XY= -1.8880 YY= 29.0100 ZY= -0.0106  
 XZ= -0.7731 YZ= -0.8165 ZZ= 31.8045  
 Eigenvalues: 27.8249 30.7690 32.0326

36 H Isotropic = 29.7898 Anisotropy = 8.9657  
 XX= 29.6973 YX= -0.8262 ZX= 0.1890  
 XY= -0.0747 YY= 33.9217 ZY= -3.8979  
 XZ= 0.1750 YZ= -4.5929 ZZ= 25.7506  
 Eigenvalues: 23.9442 29.6584 35.7670

37 H Isotropic = 30.1342 Anisotropy = 7.2349  
 XX= 28.7773 YX= -1.2486 ZX= -0.8472  
 XY= -0.9227 YY= 29.9544 ZY= 3.5806  
 XZ= -0.5036 YZ= 4.0463 ZZ= 31.6708  
 Eigenvalues: 26.8026 28.6425 34.9575

38 H Isotropic = 29.5999 Anisotropy = 9.1653  
 XX= 31.2012 YX= 0.3418 ZX= 4.4196  
 XY= -0.8718 YY= 27.4490 ZY= -2.1089  
 XZ= 4.9513 YZ= -2.1168 ZZ= 30.1494  
 Eigenvalues: 25.0504 28.0391 35.7101

39 H Isotropic = 29.2856 Anisotropy = 9.0499  
 XX= 33.8881 YX= -1.4680 ZX= -2.2289  
 XY= -2.1410 YY= 26.8636 ZY= 1.3687  
 XZ= -2.8641 YZ= 1.7476 ZZ= 27.1052  
 Eigenvalues: 25.3915 27.1465 35.3189

40 H Isotropic = 30.8841 Anisotropy = 8.8330  
 XX= 70.5817 YX= -0.9397 ZX= -4.1478  
 XY= -1.2145 YY= 68.0288 ZY= -1.6398  
 XZ= -3.0411 YZ= -0.3440 ZZ= 77.0447  
 Eigenvalues: 25.5115 30.3681 36.7728

41 H Isotropic = 30.5028 Anisotropy = 5.5433  
 XX= 70.5817 YX= -0.9397 ZX= -4.1478  
 XY= -1.2145 YY= 68.0288 ZY= -1.6398  
 XZ= -3.0411 YZ= -0.3440 ZZ= 77.0447  
 Eigenvalues: 25.9005 31.4096 34.1984

42 H Isotropic = 31.4942 Anisotropy = 11.2796  
 XX= 70.5817 YX= -0.9397 ZX= -4.1478  
 XY= -1.2145 YY= 68.0288 ZY= -1.6398  
 XZ= -3.0411 YZ= -0.3440 ZZ= 77.0447  
 Eigenvalues: 27.1369 28.3319 39.0140

34 H Isotropic = 29.5188 Anisotropy = 8.1542  
 XX= 30.2956 YX= 2.5756 ZX= -0.8575  
 XY= 2.7888 YY= 32.7387 ZY= -2.2040  
 XZ= -0.9463 YZ= -1.7466 ZZ= 25.5220  
 Eigenvalues: 25.0066 28.5948 34.9549

35 H Isotropic = 30.0041 Anisotropy = 4.0707  
 XX= 30.1041 YX= 1.1001 ZX= 0.7321  
 XY= 0.3954 YY= 27.6909 ZY= -0.8373  
 XZ= 1.3953 YZ= -0.9137 ZZ= 32.2172  
 Eigenvalues: 27.2109 30.0834 32.7178

36 H Isotropic = 29.7735 Anisotropy = 7.5848  
 XX= 29.9952 YX= 1.6211 ZX= -1.7647  
 XY= 1.8253 YY= 34.1561 ZY= 0.8341  
 XZ= -1.5678 YZ= 1.8269 ZZ= 25.1692  
 Eigenvalues: 24.3181 30.1724 34.8300

37 H Isotropic = 29.6877 Anisotropy = 10.1996  
 XX= 31.9557 YX= -4.8675 ZX= 3.4769  
 XY= -4.0795 YY= 29.0178 ZY= -1.4972  
 XZ= 2.7122 YZ= -1.1546 ZZ= 28.0896  
 Eigenvalues: 25.4260 27.1496 36.4874

38 H Isotropic = 29.5281 Anisotropy = 7.3582  
 XX= 27.8117 YX= 1.4811 ZX= 0.6925  
 XY= 0.9424 YY= 26.6069 ZY= 1.5294  
 XZ= -0.1312 YZ= 1.1585 ZZ= 34.1657  
 Eigenvalues: 25.7342 28.4166 34.4336

39 H Isotropic = 29.4052 Anisotropy = 9.4264  
 XX= 32.3050 YX= -2.1419 ZX= -4.3955  
 XY= -2.8171 YY= 27.2074 ZY= 1.0819  
 XZ= -3.9663 YZ= -0.2391 ZZ= 28.7033  
 Eigenvalues: 25.2371 27.2891 35.6895

40 H Isotropic = 30.9823 Anisotropy = 8.8193  
 XX= 29.2699 YX= 0.7381 ZX= 3.0169  
 XY= 0.7484 YY= 27.6732 ZY= 1.0543  
 XZ= 1.5541 YZ= 0.9879 ZZ= 36.0039  
 Eigenvalues: 27.3785 28.7065 36.8619

41 H Isotropic = 30.4620 Anisotropy = 9.3510  
 XX= 35.2213 YX= -3.2176 ZX= 3.5591  
 XY= -1.2642 YY= 29.8143 ZY= 1.6663  
 XZ= 2.6662 YZ= 0.5474 ZZ= 26.3504  
 Eigenvalues: 24.7419 29.9481 36.6960

42 H Isotropic = 31.0259 Anisotropy = 10.4256  
 XX= 33.7717 YX= 5.8527 ZX= 1.5105  
 XY= 3.9716 YY= 31.9724 ZY= -0.3131  
 XZ= 1.6316 YZ= -0.0923 ZZ= 27.3336  
 Eigenvalues: 26.3500 28.7514 37.9763

**Chemical Shielding tensors (GIAO MPW1PW91/6-311+G(2d,p) IEFPCM = DMSO),  
3R\*,7S\*,11R\*-1b**

**Conf. A (17 %)**

|              |          |             |          |              |          |
|--------------|----------|-------------|----------|--------------|----------|
| 1            | C        | Isotropic = | 72.8410  | Anisotropy = | 131.1345 |
| XX=          | 71.7102  | YX=         | -14.1267 | ZX=          | 58.3838  |
| XY=          | 2.1034   | YY=         | 45.4428  | ZY=          | 53.7820  |
| XZ=          | 47.8844  | YZ=         | 64.6182  | ZZ=          | 101.3700 |
| Eigenvalues: | -8.4851  | 66.7441     | 160.2640 |              |          |
| 2            | C        | Isotropic = | 27.4854  | Anisotropy = | 128.3085 |
| XX=          | -14.2758 | YX=         | 30.9418  | ZX=          | 59.9935  |
| XY=          | 33.6347  | YY=         | 28.0072  | ZY=          | 20.4759  |
| XZ=          | 59.3216  | YZ=         | 20.1272  | ZZ=          | 68.7250  |
| Eigenvalues: | -50.6183 | 20.0501     | 113.0245 |              |          |
| 3            | C        | Isotropic = | 67.4605  | Anisotropy = | 126.5354 |
| XX=          | 73.3093  | YX=         | 47.5154  | ZX=          | 24.9060  |
| XY=          | 41.0577  | YY=         | 16.3607  | ZY=          | 40.0440  |
| XZ=          | 33.4716  | YZ=         | 38.7626  | ZZ=          | 112.7116 |
| Eigenvalues: | -11.8039 | 62.3679     | 151.8174 |              |          |
| 4            | C        | Isotropic = | 60.7801  | Anisotropy = | 169.3561 |
| XX=          | 44.4838  | YX=         | 8.3529   | ZX=          | 72.8624  |
| XY=          | 10.2724  | YY=         | 28.4878  | ZY=          | 61.1860  |
| XZ=          | 53.3228  | YZ=         | 68.8927  | ZZ=          | 109.3688 |
| Eigenvalues: | -19.5809 | 28.2371     | 173.6841 |              |          |
| 5            | C        | Isotropic = | 34.4257  | Anisotropy = | 118.3157 |
| XX=          | -9.7861  | YX=         | 32.3777  | ZX=          | 58.3827  |
| XY=          | 33.4686  | YY=         | 44.0136  | ZY=          | 13.7861  |
| XZ=          | 55.7150  | YZ=         | 21.3418  | ZZ=          | 69.0497  |
| Eigenvalues: | -45.0567 | 35.0309     | 113.3029 |              |          |
| 6            | C        | Isotropic = | 53.7832  | Anisotropy = | 164.8183 |
| XX=          | 48.3575  | YX=         | 45.1070  | ZX=          | 46.9923  |
| XY=          | 40.6753  | YY=         | 1.7571   | ZY=          | 53.3644  |
| XZ=          | 50.8701  | YZ=         | 46.1904  | ZZ=          | 111.2350 |
| Eigenvalues: | -27.1392 | 24.8267     | 163.6620 |              |          |
| 7            | C        | Isotropic = | 160.5742 | Anisotropy = | 19.4919  |
| XX=          | 165.3246 | YX=         | 4.7748   | ZX=          | -4.2461  |
| XY=          | 7.6666   | YY=         | 158.3084 | ZY=          | -3.5995  |
| XZ=          | -12.0818 | YZ=         | -1.7590  | ZZ=          | 158.0895 |
| Eigenvalues: | 152.3981 | 155.7557    | 173.5688 |              |          |
| 8            | C        | Isotropic = | 153.7030 | Anisotropy = | 10.8588  |
| XX=          | 147.8749 | YX=         | -3.9355  | ZX=          | 4.4082   |
| XY=          | 2.3711   | YY=         | 158.7913 | ZY=          | 8.3779   |
| XZ=          | -2.2610  | YZ=         | -0.9037  | ZZ=          | 154.4428 |
| Eigenvalues: | 147.5088 | 152.6579    | 160.9422 |              |          |
| 9            | C        | Isotropic = | 103.9349 | Anisotropy = | 47.6852  |
| XX=          | 103.2462 | YX=         | 11.2493  | ZX=          | -13.7579 |
| XY=          | 14.2731  | YY=         | 92.4558  | ZY=          | -18.1343 |
| XZ=          | -8.6864  | YZ=         | -22.1317 | ZZ=          | 116.1026 |
| Eigenvalues: | 79.3041  | 96.7755     | 135.7250 |              |          |
| 10           | O        | Isotropic = | 189.5275 | Anisotropy = | 101.1327 |
| XX=          | 192.1146 | YX=         | -2.3982  | ZX=          | 39.7905  |
| XY=          | -1.2827  | YY=         | 161.9670 | ZY=          | 47.9327  |
| XZ=          | 54.7688  | YZ=         | 9.7656   | ZZ=          | 214.5008 |
| Eigenvalues: | 136.9294 | 174.7037    | 256.9493 |              |          |
| 11           | C        | Isotropic = | 144.8231 | Anisotropy = | 42.0775  |
| XX=          | 147.7598 | YX=         | -17.3028 | ZX=          | -7.4844  |
| XY=          | -7.6221  | YY=         | 164.3518 | ZY=          | 1.6979   |
| XZ=          | -12.6974 | YZ=         | 9.1368   | ZZ=          | 122.3578 |
| Eigenvalues: | 118.8116 | 142.7830    | 172.8748 |              |          |
| 12           | C        | Isotropic = | 42.2015  | Anisotropy = | 143.4627 |
| XX=          | 56.0197  | YX=         | -70.5480 | ZX=          | -66.3756 |
| XY=          | -65.8559 | YY=         | 14.8007  | ZY=          | -0.1180  |
| XZ=          | -56.1280 | YZ=         | -4.0791  | ZZ=          | 55.7840  |
| Eigenvalues: | -51.5574 | 40.3185     | 137.8433 |              |          |
| 13           | C        | Isotropic = | 25.2572  | Anisotropy = | 181.4030 |
| XX=          | 41.9351  | YX=         | -90.4642 | ZX=          | -64.6414 |
| XY=          | -86.4608 | YY=         | 9.5547   | ZY=          | 7.9098   |
| XZ=          | -82.9881 | YZ=         | -2.1951  | ZZ=          | 24.2819  |
| Eigenvalues: | -85.9669 | 15.5460     | 146.1926 |              |          |
| 14           | C        | Isotropic = | 134.8075 | Anisotropy = | 34.7297  |
| XX=          | 155.1712 | YX=         | -0.6979  | ZX=          | 12.4229  |
| XY=          | -3.9164  | YY=         | 116.8285 | ZY=          | 5.6408   |
| XZ=          | 4.4549   | YZ=         | 7.2167   | ZZ=          | 132.4229 |
| Eigenvalues: | 113.8703 | 132.5916    | 157.9607 |              |          |
| 15           | C        | Isotropic = | 166.5047 | Anisotropy = | 25.9204  |
| XX=          | 163.8157 | YX=         | -6.9936  | ZX=          | -2.1059  |
| XY=          | -7.3209  | YY=         | 179.2756 | ZY=          | -7.2280  |
| XZ=          | 0.4912   | YZ=         | -7.9291  | ZZ=          | 156.4228 |
| Eigenvalues: | 153.2449 | 162.4843    | 183.7850 |              |          |

|    |   |              |           |              |           |
|----|---|--------------|-----------|--------------|-----------|
| 16 | O | Isotropic =  | 235.6240  | Anisotropy = | 77.7286   |
|    |   | XX=          | 265.5237  | YX=          | -24.3318  |
|    |   | XY=          | -58.0532  | YY=          | 207.0518  |
|    |   | XZ=          | 32.2705   | YZ=          | 43.9311   |
|    |   | ZZ=          | 234.2965  |              |           |
|    |   | Eigenvalues: | 145.0463  | 274.3826     | 287.4431  |
| 17 | C | Isotropic =  | 132.1010  | Anisotropy = | 72.5497   |
|    |   | XX=          | 131.6444  | YX=          | 27.2740   |
|    |   | XY=          | 23.7501   | YY=          | 128.0296  |
|    |   | XZ=          | -22.9317  | YZ=          | -24.0996  |
|    |   | ZZ=          | 136.6291  |              |           |
|    |   | Eigenvalues: | 104.2270  | 111.6087     | 180.4675  |
| 18 | C | Isotropic =  | 110.7369  | Anisotropy = | 44.5581   |
|    |   | XX=          | 132.3339  | YX=          | -0.5792   |
|    |   | XY=          | 3.3276    | YY=          | 99.8967   |
|    |   | XZ=          | 18.1805   | YZ=          | -4.0011   |
|    |   | ZZ=          | 99.9799   |              |           |
|    |   | Eigenvalues: | 90.1612   | 101.6071     | 140.4423  |
| 19 | C | Isotropic =  | 153.1834  | Anisotropy = | 49.8408   |
|    |   | XX=          | 143.7681  | YX=          | 16.6380   |
|    |   | XY=          | 15.8424   | YY=          | 171.2146  |
|    |   | XZ=          | -8.6849   | YZ=          | -15.4859  |
|    |   | ZZ=          | 144.5674  |              |           |
|    |   | Eigenvalues: | 136.0507  | 137.0889     | 186.4106  |
| 20 | O | Isotropic =  | 242.9619  | Anisotropy = | 52.6081   |
|    |   | XX=          | 237.1525  | YX=          | -9.6688   |
|    |   | XY=          | 1.5283    | YY=          | 231.6416  |
|    |   | XZ=          | 16.6016   | YZ=          | 29.5945   |
|    |   | ZZ=          | 260.0917  |              |           |
|    |   | Eigenvalues: | 211.7275  | 239.1244     | 278.0340  |
| 21 | C | Isotropic =  | 159.1455  | Anisotropy = | 35.2562   |
|    |   | XX=          | 153.5243  | YX=          | -4.6623   |
|    |   | XY=          | 1.9698    | YY=          | 141.6118  |
|    |   | XZ=          | 2.4194    | YZ=          | 2.3137    |
|    |   | ZZ=          | 182.3006  |              |           |
|    |   | Eigenvalues: | 141.1125  | 153.6745     | 182.6497  |
| 22 | C | Isotropic =  | -30.7256  | Anisotropy = | 192.1434  |
|    |   | XX=          | 20.8630   | YX=          | -35.0668  |
|    |   | XY=          | -47.6230  | YY=          | -71.4364  |
|    |   | XZ=          | -88.6833  | YZ=          | 10.9387   |
|    |   | ZZ=          | -41.6033  |              |           |
|    |   | Eigenvalues: | -113.4418 | -76.1050     | 97.3700   |
| 23 | C | Isotropic =  | 126.7900  | Anisotropy = | 29.3439   |
|    |   | XX=          | 128.4605  | YX=          | 21.2022   |
|    |   | XY=          | 14.0345   | YY=          | 127.1530  |
|    |   | XZ=          | -5.2208   | YZ=          | -10.3329  |
|    |   | ZZ=          | 124.7566  |              |           |
|    |   | Eigenvalues: | 109.1269  | 124.8905     | 146.3526  |
| 24 | C | Isotropic =  | 136.1764  | Anisotropy = | 25.4856   |
|    |   | XX=          | 124.7219  | YX=          | 14.9166   |
|    |   | XY=          | 16.4774   | YY=          | 136.0583  |
|    |   | XZ=          | 15.5528   | YZ=          | -2.2435   |
|    |   | ZZ=          | 147.7490  |              |           |
|    |   | Eigenvalues: | 110.8245  | 144.5379     | 153.1668  |
| 25 | C | Isotropic =  | 136.5891  | Anisotropy = | 37.7038   |
|    |   | XX=          | 151.6437  | YX=          | 9.8882    |
|    |   | XY=          | 19.8195   | YY=          | 130.3587  |
|    |   | XZ=          | 7.6931    | YZ=          | 8.9223    |
|    |   | ZZ=          | 127.7651  |              |           |
|    |   | Eigenvalues: | 118.2847  | 129.7577     | 161.7250  |
| 26 | C | Isotropic =  | 154.1683  | Anisotropy = | 32.9240   |
|    |   | XX=          | 161.8624  | YX=          | 13.4032   |
|    |   | XY=          | 22.2477   | YY=          | 147.7940  |
|    |   | XZ=          | 8.6615    | YZ=          | -6.5865   |
|    |   | ZZ=          | 152.8484  |              |           |
|    |   | Eigenvalues: | 129.6969  | 156.6902     | 176.1176  |
| 27 | C | Isotropic =  | 164.6931  | Anisotropy = | 28.3263   |
|    |   | XX=          | 154.4269  | YX=          | 15.9564   |
|    |   | XY=          | 17.0870   | YY=          | 164.5828  |
|    |   | XZ=          | 12.4144   | YZ=          | -11.8266  |
|    |   | ZZ=          | 175.0695  |              |           |
|    |   | Eigenvalues: | 134.5869  | 175.9150     | 183.5772  |
| 28 | C | Isotropic =  | 148.7585  | Anisotropy = | 44.2751   |
|    |   | XX=          | 137.8460  | YX=          | 19.6935   |
|    |   | XY=          | 17.4514   | YY=          | 165.7841  |
|    |   | XZ=          | 13.1134   | YZ=          | 8.1779    |
|    |   | ZZ=          | 142.6455  |              |           |
|    |   | Eigenvalues: | 122.3938  | 145.6065     | 178.2753  |
| 29 | C | Isotropic =  | 164.4079  | Anisotropy = | 38.9214   |
|    |   | XX=          | 164.9550  | YX=          | -15.2767  |
|    |   | XY=          | -17.0387  | YY=          | 164.5200  |
|    |   | XZ=          | -14.8496  | YZ=          | 7.1517    |
|    |   | ZZ=          | 163.7488  |              |           |
|    |   | Eigenvalues: | 145.6072  | 157.2610     | 190.3555  |
| 30 | C | Isotropic =  | 163.7135  | Anisotropy = | 35.7236   |
|    |   | XX=          | 178.7578  | YX=          | -12.7544  |
|    |   | XY=          | -16.7664  | YY=          | 152.3575  |
|    |   | XZ=          | -3.9553   | YZ=          | 12.8951   |
|    |   | ZZ=          | 160.0252  |              |           |
|    |   | Eigenvalues: | 141.2235  | 162.3878     | 187.5292  |
| 31 | O | Isotropic =  | -253.8998 | Anisotropy = | 905.3571  |
|    |   | XX=          | 52.7493   | YX=          | -53.1220  |
|    |   | XY=          | -69.0788  | YY=          | -422.8521 |
|    |   | XZ=          | -399.6525 | YZ=          | 294.1151  |
|    |   | ZZ=          | -391.5967 |              |           |

|              |             |           |              |         |
|--------------|-------------|-----------|--------------|---------|
| Eigenvalues: | -778.1578   | -333.2133 | 349.6716     |         |
| 32 C         | Isotropic = | 161.8703  | Anisotropy = | 39.8286 |
| XX=          | 150.3192    | YX=       | 10.3129      | ZX=     |
| XY=          | 9.0238      | YY=       | 155.3819     | ZY=     |
| XZ=          | 14.1331     | YZ=       | 5.1718       | ZZ=     |
| Eigenvalues: | 140.1899    | 156.9984  | 188.4227     |         |
| 33 H         | Isotropic = | 25.1229   | Anisotropy = | 9.6465  |
| XX=          | 28.3066     | YX=       | -4.0354      | ZX=     |
| XY=          | -4.0782     | YY=       | 25.5146      | ZY=     |
| XZ=          | -2.4330     | YZ=       | -0.2399      | ZZ=     |
| Eigenvalues: | 20.2074     | 23.6074   | 31.5540      |         |
| 34 H         | Isotropic = | 24.9508   | Anisotropy = | 8.3936  |
| XX=          | 27.8386     | YX=       | 0.0426       | ZX=     |
| XY=          | -0.0007     | YY=       | 23.4325      | ZY=     |
| XZ=          | -4.5247     | YZ=       | -1.1208      | ZZ=     |
| Eigenvalues: | 20.5150     | 23.7909   | 30.5466      |         |
| 35 H         | Isotropic = | 29.0290   | Anisotropy = | 9.2761  |
| XX=          | 29.0757     | YX=       | -1.0844      | ZX=     |
| XY=          | -2.4164     | YY=       | 34.1722      | ZY=     |
| XZ=          | -1.9314     | YZ=       | 2.4464       | ZZ=     |
| Eigenvalues: | 22.9808     | 28.8932   | 35.2130      |         |
| 36 H         | Isotropic = | 28.8439   | Anisotropy = | 8.3178  |
| XX=          | 29.3947     | YX=       | -3.0300      | ZX=     |
| XY=          | -3.1209     | YY=       | 26.1684      | ZY=     |
| XZ=          | 1.3399      | YZ=       | -3.7263      | ZZ=     |
| Eigenvalues: | 23.9510     | 28.1916   | 34.3891      |         |
| 37 H         | Isotropic = | 29.8880   | Anisotropy = | 10.5202 |
| XX=          | 34.8871     | YX=       | -0.6727      | ZX=     |
| XY=          | 0.6692      | YY=       | 28.3747      | ZY=     |
| XZ=          | 4.6502      | YZ=       | 3.6092       | ZZ=     |
| Eigenvalues: | 23.0487     | 29.7138   | 36.9015      |         |
| 38 H         | Isotropic = | 30.1006   | Anisotropy = | 6.4424  |
| XX=          | 31.6639     | YX=       | 0.8071       | ZX=     |
| XY=          | 1.4262      | YY=       | 30.7974      | ZY=     |
| XZ=          | -1.8975     | YZ=       | -3.8399      | ZZ=     |
| Eigenvalues: | 25.2917     | 30.6145   | 34.3955      |         |
| 39 H         | Isotropic = | 28.6261   | Anisotropy = | 10.9171 |
| XX=          | 33.9341     | YX=       | -2.7851      | ZX=     |
| XY=          | -2.7154     | YY=       | 28.4066      | ZY=     |
| XZ=          | 0.9832      | YZ=       | -4.5313      | ZZ=     |
| Eigenvalues: | 21.4976     | 28.4764   | 35.9041      |         |
| 40 H         | Isotropic = | 29.0792   | Anisotropy = | 2.5837  |
| XX=          | 28.5765     | YX=       | 1.5281       | ZX=     |
| XY=          | -0.5536     | YY=       | 29.0590      | ZY=     |
| XZ=          | -0.5499     | YZ=       | -1.1409      | ZZ=     |
| Eigenvalues: | 27.5686     | 28.8674   | 30.8017      |         |
| 41 H         | Isotropic = | 29.7594   | Anisotropy = | 3.8642  |
| XX=          | 31.7308     | YX=       | 0.9042       | ZX=     |
| XY=          | 1.6820      | YY=       | 26.1384      | ZY=     |
| XZ=          | -0.7967     | YZ=       | -0.9246      | ZZ=     |
| Eigenvalues: | 25.8511     | 31.0915   | 32.3355      |         |
| 42 H         | Isotropic = | 28.1072   | Anisotropy = | 7.7140  |
| XX=          | 27.5124     | YX=       | -3.5147      | ZX=     |
| XY=          | -2.7560     | YY=       | 30.8812      | ZY=     |
| XZ=          | 3.3686      | YZ=       | 0.0076       | ZZ=     |
| Eigenvalues: | 23.4354     | 27.6364   | 33.2499      |         |
| 43 H         | Isotropic = | 29.9133   | Anisotropy = | 8.7892  |
| XX=          | 31.1836     | YX=       | 0.6022       | ZX=     |
| XY=          | 1.9708      | YY=       | 31.4155      | ZY=     |
| XZ=          | -4.0509     | YZ=       | -3.1878      | ZZ=     |
| Eigenvalues: | 23.9550     | 30.0121   | 35.7727      |         |
| 44 H         | Isotropic = | 29.4024   | Anisotropy = | 9.2918  |
| XX=          | 34.8085     | YX=       | -0.9254      | ZX=     |
| XY=          | -1.1867     | YY=       | 26.0857      | ZY=     |
| XZ=          | 2.3376      | YZ=       | -4.0007      | ZZ=     |
| Eigenvalues: | 23.4311     | 29.1793   | 35.5969      |         |
| 45 H         | Isotropic = | 29.3591   | Anisotropy = | 5.8379  |
| XX=          | 27.9840     | YX=       | 0.4948       | ZX=     |
| XY=          | -1.4487     | YY=       | 31.6852      | ZY=     |
| XZ=          | -3.1655     | YZ=       | 1.9917       | ZZ=     |
| Eigenvalues: | 25.1156     | 29.7106   | 33.2511      |         |
| 46 H         | Isotropic = | 27.9207   | Anisotropy = | 9.0586  |
| XX=          | 31.5218     | YX=       | -1.5895      | ZX=     |
| XY=          | 0.0929      | YY=       | 26.0191      | ZY=     |
| XZ=          | -4.7560     | YZ=       | -0.3801      | ZZ=     |
| Eigenvalues: | 23.3154     | 26.4869   | 33.9598      |         |
| 47 H         | Isotropic = | 28.1939   | Anisotropy = | 8.0207  |
| XX=          | 26.3650     | YX=       | 0.8003       | ZX=     |
| XY=          | -1.2502     | YY=       | 26.1207      | ZY=     |

|              |             |     |         |              |         |         |
|--------------|-------------|-----|---------|--------------|---------|---------|
| XZ=          | -1.5038     | YZ= | -2.7717 | ZZ=          | 32.0959 |         |
| Eigenvalues: | 24.5482     |     | 26.4924 |              | 33.5410 |         |
| 48 H         | Isotropic = |     | 28.1769 | Anisotropy = |         | 8.2952  |
| XX=          | 30.1133     | YX= | 4.3548  | ZX=          | -1.2085 |         |
| XY=          | 2.8529      | YY= | 29.8377 | ZY=          | 0.2981  |         |
| XZ=          | -0.6880     | YZ= | -1.4073 | ZZ=          | 24.5796 |         |
| Eigenvalues: | 24.4209     |     | 26.4026 |              | 33.7070 |         |
| 49 H         | Isotropic = |     | 30.5115 | Anisotropy = |         | 7.3727  |
| XX=          | 27.6488     | YX= | 0.4927  | ZX=          | -1.4443 |         |
| XY=          | 0.4760      | YY= | 30.6106 | ZY=          | -4.0478 |         |
| XZ=          | -0.6062     | YZ= | -2.0374 | ZZ=          | 33.2751 |         |
| Eigenvalues: | 27.4661     |     | 28.6418 |              | 35.4266 |         |
| 50 H         | Isotropic = |     | 30.3703 | Anisotropy = |         | 9.1824  |
| XX=          | 27.4318     | YX= | -1.0703 | ZX=          | -0.6727 |         |
| XY=          | -2.5340     | YY= | 36.1106 | ZY=          | -0.1664 |         |
| XZ=          | -0.3288     | YZ= | -0.9358 | ZZ=          | 27.5686 |         |
| Eigenvalues: | 26.6661     |     | 27.9529 |              | 36.4919 |         |
| 51 H         | Isotropic = |     | 30.5236 | Anisotropy = |         | 7.6111  |
| XX=          | 33.5182     | YX= | 2.5301  | ZX=          | 0.8675  |         |
| XY=          | 3.3473      | YY= | 31.4426 | ZY=          | -0.4720 |         |
| XZ=          | 0.3267      | YZ= | -0.9464 | ZZ=          | 26.6100 |         |
| Eigenvalues: | 26.3282     |     | 29.6450 |              | 35.5977 |         |
| 52 H         | Isotropic = |     | 28.6311 | Anisotropy = |         | 18.9366 |
| XX=          | 23.3356     | YX= | -1.4662 | ZX=          | 5.0793  |         |
| XY=          | 0.4262      | YY= | 29.5665 | ZY=          | 7.8688  |         |
| XZ=          | 3.8546      | YZ= | 10.6636 | ZZ=          | 32.9913 |         |
| Eigenvalues: | 19.0756     |     | 25.5623 |              | 41.2555 |         |
| 53 H         | Isotropic = |     | 30.5465 | Anisotropy = |         | 4.7275  |
| XX=          | 27.9676     | YX= | -0.4697 | ZX=          | -2.4011 |         |
| XY=          | 0.2390      | YY= | 33.0129 | ZY=          | -0.5978 |         |
| XZ=          | -2.3679     | YZ= | -1.8628 | ZZ=          | 30.6591 |         |
| Eigenvalues: | 26.4935     |     | 31.4479 |              | 33.6982 |         |
| 54 H         | Isotropic = |     | 30.9467 | Anisotropy = |         | 6.6791  |
| XX=          | 30.7709     | YX= | -0.1585 | ZX=          | 3.0497  |         |
| XY=          | 0.5000      | YY= | 30.0609 | ZY=          | 1.5156  |         |
| XZ=          | 4.2332      | YZ= | 1.5665  | ZZ=          | 32.0082 |         |
| Eigenvalues: | 27.3918     |     | 30.0487 |              | 35.3994 |         |
| 55 H         | Isotropic = |     | 30.5452 | Anisotropy = |         | 9.0334  |
| XX=          | 29.3830     | YX= | -4.2954 | ZX=          | -2.0865 |         |
| XY=          | -2.8925     | YY= | 32.0665 | ZY=          | 2.2173  |         |
| XZ=          | -2.4777     | YZ= | 3.3201  | ZZ=          | 30.1861 |         |
| Eigenvalues: | 26.8368     |     | 28.2314 |              | 36.5675 |         |
| 56 H         | Isotropic = |     | 28.8108 | Anisotropy = |         | 8.6735  |
| XX=          | 33.2789     | YX= | -1.3811 | ZX=          | 3.5138  |         |
| XY=          | -0.0162     | YY= | 27.7786 | ZY=          | -0.2172 |         |
| XZ=          | 3.3085      | YZ= | 0.7795  | ZZ=          | 25.3750 |         |
| Eigenvalues: | 24.0371     |     | 27.8022 |              | 34.5931 |         |
| 57 H         | Isotropic = |     | 29.6171 | Anisotropy = |         | 4.9476  |
| XX=          | 30.4635     | YX= | 2.9474  | ZX=          | 0.4558  |         |
| XY=          | 1.8586      | YY= | 26.0040 | ZY=          | -0.7393 |         |
| XZ=          | 1.7581      | YZ= | -0.6678 | ZZ=          | 32.3839 |         |
| Eigenvalues: | 24.7981     |     | 31.1379 |              | 32.9155 |         |
| 58 H         | Isotropic = |     | 29.6830 | Anisotropy = |         | 8.2541  |
| XX=          | 31.5032     | YX= | -2.7928 | ZX=          | 3.2741  |         |
| XY=          | -2.5208     | YY= | 29.9866 | ZY=          | -1.8372 |         |
| XZ=          | 2.6726      | YZ= | -2.1555 | ZZ=          | 27.5591 |         |
| Eigenvalues: | 25.8672     |     | 27.9961 |              | 35.1857 |         |
| 59 H         | Isotropic = |     | 30.2813 | Anisotropy = |         | 9.2429  |
| XX=          | 27.4885     | YX= | 1.1371  | ZX=          | 1.4896  |         |
| XY=          | 1.5285      | YY= | 27.1445 | ZY=          | 0.0076  |         |
| XZ=          | 1.3054      | YZ= | 0.2989  | ZZ=          | 36.2108 |         |
| Eigenvalues: | 25.9063     |     | 28.4944 |              | 36.4432 |         |
| 60 H         | Isotropic = |     | 30.0183 | Anisotropy = |         | 11.5873 |
| XX=          | 26.0782     | YX= | 2.4707  | ZX=          | 1.7286  |         |
| XY=          | 2.1261      | YY= | 34.2865 | ZY=          | 4.5146  |         |
| XZ=          | 1.5943      | YZ= | 4.5216  | ZZ=          | 29.6903 |         |
| Eigenvalues: | 25.3647     |     | 26.9471 |              | 37.7432 |         |
| 61 H         | Isotropic = |     | 29.9952 | Anisotropy = |         | 11.9716 |
| XX=          | 36.8897     | YX= | 3.3298  | ZX=          | 0.6767  |         |
| XY=          | 3.5772      | YY= | 26.5729 | ZY=          | -0.5502 |         |
| XZ=          | 1.0003      | YZ= | -0.4875 | ZZ=          | 26.5230 |         |
| Eigenvalues: | 25.1227     |     | 26.8866 |              | 37.9762 |         |
| 62 H         | Isotropic = |     | 30.0130 | Anisotropy = |         | 7.6907  |
| XX=          | 28.9688     | YX= | -1.4249 | ZX=          | 1.5975  |         |
| XY=          | -2.3558     | YY= | 34.2838 | ZY=          | -1.1130 |         |
| XZ=          | 1.5003      | YZ= | -0.9110 | ZZ=          | 26.7866 |         |
| Eigenvalues: | 25.9829     |     | 28.9160 |              | 35.1402 |         |
| 63 H         | Isotropic = |     | 30.2155 | Anisotropy = |         | 8.9709  |
| XX=          | 29.1755     | YX= | 3.2600  | ZX=          | -2.2058 |         |



|              |             |         |              |     |         |         |
|--------------|-------------|---------|--------------|-----|---------|---------|
| XY=          | 3.7398      | YY=     | 29.9711      | ZY= | -3.2586 |         |
| XZ=          | -2.2594     | YZ=     | -2.9673      | ZZ= | 31.5000 |         |
| Eigenvalues: | 26.0027     |         | 28.4478      |     | 36.1961 |         |
| 64 H         | Isotropic = | 30.3131 | Anisotropy = |     |         | 8.3014  |
| XX=          | 30.3339     | YX=     | 0.5348       | ZX= | -2.4356 |         |
| XY=          | 0.9594      | YY=     | 35.6474      | ZY= | 1.4475  |         |
| XZ=          | -1.6618     | YZ=     | 1.1078       | ZZ= | 24.9579 |         |
| Eigenvalues: | 24.0843     |         | 31.0076      |     | 35.8474 |         |
| 65 H         | Isotropic = | 30.8186 | Anisotropy = |     |         | 8.5709  |
| XX=          | 36.0402     | YX=     | -1.3218      | ZX= | 0.8876  |         |
| XY=          | -2.8378     | YY=     | 27.6740      | ZY= | 1.7376  |         |
| XZ=          | 0.3067      | YZ=     | 1.8834       | ZZ= | 28.7416 |         |
| Eigenvalues: | 25.9104     |         | 30.0129      |     | 36.5325 |         |
| 66 H         | Isotropic = | 31.3874 | Anisotropy = |     |         | 9.9874  |
| XX=          | 31.3199     | YX=     | 0.7172       | ZX= | -5.3017 |         |
| XY=          | -0.2210     | YY=     | 27.8265      | ZY= | 0.8887  |         |
| XZ=          | -3.7255     | YZ=     | -0.3710      | ZZ= | 35.0158 |         |
| Eigenvalues: | 27.6380     |         | 28.4785      |     | 38.0456 |         |
| 67 H         | Isotropic = | 31.0710 | Anisotropy = |     |         | 8.9043  |
| XX=          | 30.1893     | YX=     | -0.4604      | ZX= | -3.6269 |         |
| XY=          | 0.0928      | YY=     | 27.2866      | ZY= | 0.8912  |         |
| XZ=          | -2.1021     | YZ=     | 0.5627       | ZZ= | 35.7371 |         |
| Eigenvalues: | 27.2226     |         | 28.9831      |     | 37.0072 |         |
| 68 H         | Isotropic = | 30.8060 | Anisotropy = |     |         | 10.0846 |
| XX=          | 36.5242     | YX=     | -0.4079      | ZX= | 2.9804  |         |
| XY=          | 0.2703      | YY=     | 26.3156      | ZY= | 1.8082  |         |
| XZ=          | 2.4553      | YZ=     | 3.7499       | ZZ= | 29.5781 |         |
| Eigenvalues: | 24.5463     |         | 30.3426      |     | 37.5290 |         |
| 69 H         | Isotropic = | 30.6192 | Anisotropy = |     |         | 7.5985  |
| XX=          | 30.0666     | YX=     | -1.6254      | ZX= | -1.6637 |         |
| XY=          | -0.6550     | YY=     | 34.1243      | ZY= | 2.1211  |         |
| XZ=          | -1.0919     | YZ=     | 3.7100       | ZZ= | 27.6666 |         |
| Eigenvalues: | 26.3237     |         | 29.8490      |     | 35.6849 |         |
| 70 H         | Isotropic = | 30.6028 | Anisotropy = |     |         | 7.4038  |
| XX=          | 28.0561     | YX=     | 1.0821       | ZX= | 2.3204  |         |
| XY=          | -1.0933     | YY=     | 33.1290      | ZY= | 2.6724  |         |
| XZ=          | 0.7344      | YZ=     | 3.9911       | ZZ= | 30.6234 |         |
| Eigenvalues: | 26.8718     |         | 29.3981      |     | 35.5387 |         |
| 71 H         | Isotropic = | 30.9617 | Anisotropy = |     |         | 9.6993  |
| XX=          | 27.7669     | YX=     | 0.0273       | ZX= | 0.5931  |         |
| XY=          | 0.3983      | YY=     | 28.3330      | ZY= | -2.0582 |         |
| XZ=          | -0.6004     | YZ=     | -2.7754      | ZZ= | 36.7853 |         |
| Eigenvalues: | 27.5205     |         | 27.9368      |     | 37.4279 |         |
| 72 H         | Isotropic = | 30.1092 | Anisotropy = |     |         | 6.6833  |
| XX=          | 33.0900     | YX=     | -0.8346      | ZX= | 2.9137  |         |
| XY=          | -0.4723     | YY=     | 26.3038      | ZY= | 2.7031  |         |
| XZ=          | 1.6322      | YZ=     | 1.3296       | ZZ= | 30.9339 |         |
| Eigenvalues: | 25.2751     |         | 30.4878      |     | 34.5648 |         |

**Chemical Shielding tensors (GIAO MPW1PW91/6-311+G(2d,p) iefpcm = DMSO) 3R\*,7S\*,11R\*-  
1b**

|                       |   |              |          |              |          |
|-----------------------|---|--------------|----------|--------------|----------|
| <b>Conf. B (32 %)</b> |   |              |          |              |          |
| 1                     | C | Isotropic =  | 72.7799  | Anisotropy = | 131.1922 |
|                       |   | XX=          | 80.0520  | YX=          | -50.1863 |
|                       |   | XY=          | -32.2089 | YY=          | 10.7206  |
|                       |   | XZ=          | 44.8210  | YZ=          | -7.7637  |
|                       |   |              |          | ZZ=          | 127.5670 |
|                       |   | Eigenvalues: | -8.7103  | 66.8085      | 160.2413 |
| 2                     | C | Isotropic =  | 27.4256  | Anisotropy = | 128.4252 |
|                       |   | XX=          | -3.0185  | YX=          | -14.3734 |
|                       |   | XY=          | -12.5068 | YY=          | 23.9818  |
|                       |   | XZ=          | 71.1754  | YZ=          | -13.1099 |
|                       |   |              |          | ZZ=          | 61.3134  |
|                       |   | Eigenvalues: | -50.7592 | 19.9936      | 113.0423 |
| 3                     | C | Isotropic =  | 66.8152  | Anisotropy = | 127.3166 |
|                       |   | XX=          | 75.4845  | YX=          | 14.3083  |
|                       |   | XY=          | 9.0494   | YY=          | 16.5400  |
|                       |   | XZ=          | 47.3061  | YZ=          | -46.4618 |
|                       |   |              |          | ZZ=          | 108.4209 |
|                       |   | Eigenvalues: | -12.5357 | 61.2882      | 151.6929 |
| 4                     | C | Isotropic =  | 60.4616  | Anisotropy = | 170.6893 |
|                       |   | XX=          | 68.5296  | YX=          | -39.3217 |
|                       |   | XY=          | -30.3721 | YY=          | -5.0061  |
|                       |   | XZ=          | 78.0252  | YZ=          | -16.5789 |
|                       |   |              |          | ZZ=          | 117.8612 |
|                       |   | Eigenvalues: | -19.7839 | 26.9142      | 174.2544 |
| 5                     | C | Isotropic =  | 35.4177  | Anisotropy = | 120.8592 |
|                       |   | XX=          | 2.8223   | YX=          | -20.7722 |
|                       |   | XY=          | -12.1488 | YY=          | 41.6693  |
|                       |   | XZ=          | 75.0545  | YZ=          | -16.6477 |
|                       |   |              |          | ZZ=          | 61.7614  |
|                       |   | Eigenvalues: | -45.6389 | 35.9014      | 115.9905 |
| 6                     | C | Isotropic =  | 54.3753  | Anisotropy = | 164.4667 |
|                       |   | XX=          | 60.2872  | YX=          | 1.9144   |
|                       |   | XY=          | -6.4147  | YY=          | -1.6262  |
|                       |   | XZ=          | 67.6682  | YZ=          | -45.6086 |
|                       |   |              |          | ZZ=          | 104.4650 |
|                       |   | Eigenvalues: | -26.5354 | 25.6417      | 164.0198 |
| 7                     | C | Isotropic =  | 161.1058 | Anisotropy = | 19.0134  |
|                       |   | XX=          | 163.6685 | YX=          | 4.6738   |
|                       |   | XY=          | 6.9186   | YY=          | 164.9999 |
|                       |   | XZ=          | -0.3144  | YZ=          | -5.9212  |
|                       |   |              |          | ZZ=          | 154.6488 |
|                       |   | Eigenvalues: | 150.5709 | 158.9651     | 173.7814 |
| 8                     | C | Isotropic =  | 149.2933 | Anisotropy = | 28.2902  |
|                       |   | XX=          | 153.4179 | YX=          | -10.0415 |
|                       |   | XY=          | -19.4241 | YY=          | 152.6509 |
|                       |   | XZ=          | 7.8273   | YZ=          | 5.7742   |
|                       |   |              |          | ZZ=          | 141.8113 |
|                       |   | Eigenvalues: | 133.8314 | 145.8951     | 168.1534 |
| 9                     | C | Isotropic =  | 105.9092 | Anisotropy = | 50.6087  |
|                       |   | XX=          | 106.6322 | YX=          | 27.8864  |
|                       |   | XY=          | 27.1199  | YY=          | 116.6072 |
|                       |   | XZ=          | 2.1879   | YZ=          | -3.3496  |
|                       |   |              |          | ZZ=          | 94.4883  |
|                       |   | Eigenvalues: | 80.8572  | 97.2221      | 139.6484 |
| 10                    | O | Isotropic =  | 188.7340 | Anisotropy = | 112.7029 |
|                       |   | XX=          | 179.5672 | YX=          | 1.7845   |
|                       |   | XY=          | -17.8131 | YY=          | 134.6789 |
|                       |   | XZ=          | 7.6318   | YZ=          | -5.0367  |
|                       |   |              |          | ZZ=          | 251.9559 |
|                       |   | Eigenvalues: | 132.9253 | 169.4075     | 263.8693 |
| 11                    | C | Isotropic =  | 143.2652 | Anisotropy = | 43.8553  |
|                       |   | XX=          | 123.5167 | YX=          | 14.2430  |
|                       |   | XY=          | 16.1749  | YY=          | 145.6570 |
|                       |   | XZ=          | 13.3383  | YZ=          | 16.1327  |
|                       |   |              |          | ZZ=          | 160.6218 |
|                       |   | Eigenvalues: | 115.5862 | 141.7073     | 172.5021 |
| 12                    | C | Isotropic =  | 45.3190  | Anisotropy = | 136.0714 |
|                       |   | XX=          | 42.6248  | YX=          | 17.0453  |
|                       |   | XY=          | 15.5216  | YY=          | -41.3349 |
|                       |   | XZ=          | -3.4567  | YZ=          | 18.6831  |
|                       |   |              |          | ZZ=          | 134.6671 |
|                       |   | Eigenvalues: | -45.6620 | 45.5857      | 136.0333 |
| 13                    | C | Isotropic =  | 21.5590  | Anisotropy = | 189.8302 |
|                       |   | XX=          | -0.8448  | YX=          | 38.1806  |
|                       |   | XY=          | 20.5818  | YY=          | -78.7913 |
|                       |   | XZ=          | 15.9751  | YZ=          | 18.4914  |
|                       |   |              |          | ZZ=          | 144.3131 |
|                       |   | Eigenvalues: | -90.3210 | 6.8856       | 148.1124 |
| 14                    | C | Isotropic =  | 141.9189 | Anisotropy = | 25.9416  |
|                       |   | XX=          | 137.8648 | YX=          | -9.3865  |
|                       |   | XY=          | -7.7510  | YY=          | 147.3606 |
|                       |   | XZ=          | 20.3616  | YZ=          | -7.2716  |
|                       |   |              |          | ZZ=          | 140.5311 |
|                       |   | Eigenvalues: | 123.0013 | 143.5420     | 159.2133 |
| 15                    | C | Isotropic =  | 166.7172 | Anisotropy = | 26.6395  |
|                       |   | XX=          | 162.7635 | YX=          | -2.5537  |
|                       |   | XY=          | -4.3887  | YY=          | 178.0500 |
|                       |   | XZ=          | -3.0747  | YZ=          | 11.1695  |
|                       |   |              |          | ZZ=          | 159.3381 |
|                       |   | Eigenvalues: | 153.5344 | 162.1403     | 184.4769 |

|    |   |              |           |              |           |
|----|---|--------------|-----------|--------------|-----------|
| 16 | O | Isotropic =  | 235.5130  | Anisotropy = | 77.5712   |
|    |   | XX=          | 264.2554  | YX=          | -29.3380  |
|    |   | XY=          | -65.2083  | YY=          | 163.6048  |
|    |   | XZ=          | -9.9750   | YZ=          | -8.6955   |
|    |   |              | ZZ=       | 278.6787     |           |
|    |   | Eigenvalues: | 144.8829  | 274.4289     | 287.2271  |
| 17 | C | Isotropic =  | 132.0787  | Anisotropy = | 72.4712   |
|    |   | XX=          | 131.5686  | YX=          | 35.9159   |
|    |   | XY=          | 32.3039   | YY=          | 153.7276  |
|    |   | XZ=          | -4.3634   | YZ=          | -12.5724  |
|    |   |              | ZZ=       | 110.9400     |           |
|    |   | Eigenvalues: | 104.1947  | 111.6487     | 180.3929  |
| 18 | C | Isotropic =  | 108.2250  | Anisotropy = | 52.7811   |
|    |   | XX=          | 102.3091  | YX=          | 23.4856   |
|    |   | XY=          | 22.1799   | YY=          | 128.2541  |
|    |   | XZ=          | -1.9329   | YZ=          | -7.7378   |
|    |   |              | ZZ=       | 94.1118      |           |
|    |   | Eigenvalues: | 88.1315   | 93.1311      | 143.4124  |
| 19 | C | Isotropic =  | 158.8954  | Anisotropy = | 35.1394   |
|    |   | XX=          | 171.4082  | YX=          | -10.8606  |
|    |   | XY=          | -13.4727  | YY=          | 148.4008  |
|    |   | XZ=          | -12.2136  | YZ=          | 8.6357    |
|    |   |              | ZZ=       | 156.8772     |           |
|    |   | Eigenvalues: | 142.9546  | 151.4099     | 182.3216  |
| 20 | O | Isotropic =  | 221.1694  | Anisotropy = | 71.3005   |
|    |   | XX=          | 225.9680  | YX=          | 26.9079   |
|    |   | XY=          | 20.6449   | YY=          | 232.4401  |
|    |   | XZ=          | -27.3520  | YZ=          | -22.9752  |
|    |   |              | ZZ=       | 205.1001     |           |
|    |   | Eigenvalues: | 186.6057  | 208.1995     | 268.7031  |
| 21 | C | Isotropic =  | 155.6893  | Anisotropy = | 36.8460   |
|    |   | XX=          | 161.5905  | YX=          | -15.5401  |
|    |   | XY=          | -11.5733  | YY=          | 152.7439  |
|    |   | XZ=          | 15.4995   | YZ=          | -8.5035   |
|    |   |              | ZZ=       | 152.7335     |           |
|    |   | Eigenvalues: | 142.0651  | 144.7496     | 180.2533  |
| 22 | C | Isotropic =  | -25.0768  | Anisotropy = | 182.0712  |
|    |   | XX=          | -74.0720  | YX=          | 21.2607   |
|    |   | XY=          | 25.5745   | YY=          | -97.1138  |
|    |   | XZ=          | -5.3509   | YZ=          | -11.3016  |
|    |   |              | ZZ=       | 95.9552      |           |
|    |   | Eigenvalues: | -111.9609 | -59.5736     | 96.3040   |
| 23 | C | Isotropic =  | 126.9837  | Anisotropy = | 28.1554   |
|    |   | XX=          | 127.0000  | YX=          | 6.7423    |
|    |   | XY=          | 0.9215    | YY=          | 138.4613  |
|    |   | XZ=          | -4.4066   | YZ=          | -19.2138  |
|    |   |              | ZZ=       | 115.4898     |           |
|    |   | Eigenvalues: | 109.2265  | 125.9707     | 145.7540  |
| 24 | C | Isotropic =  | 137.4343  | Anisotropy = | 25.2630   |
|    |   | XX=          | 147.6773  | YX=          | -6.6408   |
|    |   | XY=          | -3.7119   | YY=          | 148.6807  |
|    |   | XZ=          | -11.6447  | YZ=          | 2.6753    |
|    |   |              | ZZ=       | 115.9448     |           |
|    |   | Eigenvalues: | 113.6085  | 144.4180     | 154.2763  |
| 25 | C | Isotropic =  | 140.4118  | Anisotropy = | 30.1946   |
|    |   | XX=          | 128.6613  | YX=          | -9.1108   |
|    |   | XY=          | -13.0972  | YY=          | 152.2010  |
|    |   | XZ=          | 4.2349    | YZ=          | -4.0668   |
|    |   |              | ZZ=       | 140.3733     |           |
|    |   | Eigenvalues: | 124.2459  | 136.4481     | 160.5416  |
| 26 | C | Isotropic =  | 153.9331  | Anisotropy = | 32.3897   |
|    |   | XX=          | 158.5552  | YX=          | -2.7865   |
|    |   | XY=          | -10.3082  | YY=          | 166.5167  |
|    |   | XZ=          | 3.5727    | YZ=          | -13.9369  |
|    |   |              | ZZ=       | 136.7273     |           |
|    |   | Eigenvalues: | 129.5198  | 156.7532     | 175.5262  |
| 27 | C | Isotropic =  | 164.7565  | Anisotropy = | 28.7515   |
|    |   | XX=          | 182.5534  | YX=          | -0.6823   |
|    |   | XY=          | -0.1539   | YY=          | 174.0773  |
|    |   | XZ=          | -6.9754   | YZ=          | -7.7115   |
|    |   |              | ZZ=       | 137.6388     |           |
|    |   | Eigenvalues: | 134.6635  | 175.6819     | 183.9242  |
| 28 | C | Isotropic =  | 149.0123  | Anisotropy = | 42.9414   |
|    |   | XX=          | 147.1803  | YX=          | -4.8023   |
|    |   | XY=          | 1.7066    | YY=          | 177.4777  |
|    |   | XZ=          | 2.7064    | YZ=          | 1.7389    |
|    |   |              | ZZ=       | 122.3789     |           |
|    |   | Eigenvalues: | 122.2953  | 147.1017     | 177.6399  |
| 29 | C | Isotropic =  | 164.6999  | Anisotropy = | 37.7094   |
|    |   | XX=          | 156.2172  | YX=          | 4.1580    |
|    |   | XY=          | 4.9540    | YY=          | 150.8142  |
|    |   | XZ=          | 0.7952    | YZ=          | 9.8756    |
|    |   |              | ZZ=       | 187.0684     |           |
|    |   | Eigenvalues: | 146.3481  | 157.9122     | 189.8395  |
| 30 | C | Isotropic =  | 163.6601  | Anisotropy = | 34.3144   |
|    |   | XX=          | 156.6639  | YX=          | -9.0048   |
|    |   | XY=          | -5.3895   | YY=          | 149.4394  |
|    |   | XZ=          | 7.8701    | YZ=          | 1.8741    |
|    |   |              | ZZ=       | 184.8769     |           |
|    |   | Eigenvalues: | 143.8695  | 160.5743     | 186.5363  |
| 31 | O | Isotropic =  | -281.2428 | Anisotropy = | 957.9409  |
|    |   | XX=          | -840.0165 | YX=          | -57.5151  |
|    |   | XY=          | -32.3762  | YY=          | -359.5572 |
|    |   | XZ=          | 24.6398   | YZ=          | -18.0056  |
|    |   |              | ZZ=       | 355.8452     |           |

|              |             |           |              |         |
|--------------|-------------|-----------|--------------|---------|
| Eigenvalues: | -845.0449   | -356.0680 | 357.3844     |         |
| 32 C         | Isotropic = | 159.6419  | Anisotropy = | 37.4758 |
| XX=          | 158.6942    | YX=       | -0.1742      | ZX=     |
| XY=          | 1.5086      | YY=       | 146.0168     | ZY=     |
| XZ=          | -17.2833    | YZ=       | 2.7885       | ZZ=     |
| Eigenvalues: | 144.6239    | 149.6760  | 184.6258     |         |
| 33 H         | Isotropic = | 25.0746   | Anisotropy = | 9.4279  |
| XX=          | 27.6793     | YX=       | -1.3787      | ZX=     |
| XY=          | -1.4870     | YY=       | 23.9640      | ZY=     |
| XZ=          | -4.4053     | YZ=       | 2.2516       | ZZ=     |
| Eigenvalues: | 20.3134     | 23.5506   | 31.3599      |         |
| 34 H         | Isotropic = | 24.8669   | Anisotropy = | 8.2997  |
| XX=          | 27.7462     | YX=       | 2.2481       | ZX=     |
| XY=          | 2.4986      | YY=       | 24.9113      | ZY=     |
| XZ=          | -3.0844     | YZ=       | -0.8104      | ZZ=     |
| Eigenvalues: | 20.3779     | 23.8227   | 30.4001      |         |
| 35 H         | Isotropic = | 28.7487   | Anisotropy = | 6.2279  |
| XX=          | 29.6131     | YX=       | 1.7706       | ZX=     |
| XY=          | 0.1780      | YY=       | 27.3054      | ZY=     |
| XZ=          | 0.8288      | YZ=       | 4.6771       | ZZ=     |
| Eigenvalues: | 23.9962     | 29.3493   | 32.9006      |         |
| 36 H         | Isotropic = | 29.0461   | Anisotropy = | 10.4588 |
| XX=          | 30.7815     | YX=       | -4.5995      | ZX=     |
| XY=          | -4.4251     | YY=       | 32.0729      | ZY=     |
| XZ=          | -2.1984     | YZ=       | -2.3504      | ZZ=     |
| Eigenvalues: | 22.6733     | 28.4463   | 36.0186      |         |
| 37 H         | Isotropic = | 29.9354   | Anisotropy = | 6.9861  |
| XX=          | 29.6405     | YX=       | 1.6460       | ZX=     |
| XY=          | 1.5686      | YY=       | 33.7067      | ZY=     |
| XZ=          | -1.1266     | YZ=       | -1.0956      | ZZ=     |
| Eigenvalues: | 25.9505     | 29.2629   | 34.5927      |         |
| 38 H         | Isotropic = | 29.9486   | Anisotropy = | 8.2211  |
| XX=          | 29.3322     | YX=       | -3.6801      | ZX=     |
| XY=          | -2.8058     | YY=       | 27.6296      | ZY=     |
| XZ=          | 0.8378      | YZ=       | -2.6449      | ZZ=     |
| Eigenvalues: | 24.9471     | 29.4694   | 35.4294      |         |
| 39 H         | Isotropic = | 29.3643   | Anisotropy = | 6.6967  |
| XX=          | 31.4261     | YX=       | 2.4826       | ZX=     |
| XY=          | 1.3999      | YY=       | 28.2548      | ZY=     |
| XZ=          | 4.0866      | YZ=       | -2.5112      | ZZ=     |
| Eigenvalues: | 24.7673     | 29.4969   | 33.8288      |         |
| 40 H         | Isotropic = | 28.9633   | Anisotropy = | 3.6536  |
| XX=          | 29.2548     | YX=       | -0.5151      | ZX=     |
| XY=          | 0.7336      | YY=       | 29.2480      | ZY=     |
| XZ=          | -3.4458     | YZ=       | 0.1546       | ZZ=     |
| Eigenvalues: | 26.1664     | 29.3245   | 31.3991      |         |
| 41 H         | Isotropic = | 29.2626   | Anisotropy = | 5.4936  |
| XX=          | 32.1752     | YX=       | -0.7314      | ZX=     |
| XY=          | -3.3518     | YY=       | 26.6588      | ZY=     |
| XZ=          | 0.9064      | YZ=       | 0.9278       | ZZ=     |
| Eigenvalues: | 25.8029     | 29.0599   | 32.9250      |         |
| 42 H         | Isotropic = | 28.9025   | Anisotropy = | 11.3175 |
| XX=          | 33.3227     | YX=       | 1.6787       | ZX=     |
| XY=          | 3.2230      | YY=       | 29.7131      | ZY=     |
| XZ=          | 3.9176      | YZ=       | 2.6278       | ZZ=     |
| Eigenvalues: | 21.7767     | 28.4833   | 36.4475      |         |
| 43 H         | Isotropic = | 29.2944   | Anisotropy = | 10.2512 |
| XX=          | 35.2142     | YX=       | -1.6738      | ZX=     |
| XY=          | -2.1368     | YY=       | 29.7288      | ZY=     |
| XZ=          | 2.5509      | YZ=       | -0.7743      | ZZ=     |
| Eigenvalues: | 22.5908     | 29.1638   | 36.1285      |         |
| 44 H         | Isotropic = | 29.2579   | Anisotropy = | 6.7066  |
| XX=          | 26.7103     | YX=       | 2.3001       | ZX=     |
| XY=          | 1.1899      | YY=       | 28.0586      | ZY=     |
| XZ=          | -1.5135     | YZ=       | 2.1545       | ZZ=     |
| Eigenvalues: | 25.0653     | 28.9794   | 33.7290      |         |
| 45 H         | Isotropic = | 29.8978   | Anisotropy = | 8.7237  |
| XX=          | 30.8261     | YX=       | 2.7851       | ZX=     |
| XY=          | 4.2274      | YY=       | 33.1935      | ZY=     |
| XZ=          | -1.3898     | YZ=       | 2.1143       | ZZ=     |
| Eigenvalues: | 24.4324     | 29.5474   | 35.7136      |         |
| 46 H         | Isotropic = | 27.8829   | Anisotropy = | 9.0130  |
| XX=          | 30.8178     | YX=       | 1.2449       | ZX=     |
| XY=          | 2.9733      | YY=       | 26.9107      | ZY=     |
| XZ=          | -4.0517     | YZ=       | 0.1375       | ZZ=     |
| Eigenvalues: | 23.3050     | 26.4521   | 33.8915      |         |
| 47 H         | Isotropic = | 28.1497   | Anisotropy = | 7.8849  |
| XX=          | 26.1954     | YX=       | 1.8973       | ZX=     |
| XY=          | -0.2989     | YY=       | 31.0682      | ZY=     |

|              |             |     |         |              |         |         |
|--------------|-------------|-----|---------|--------------|---------|---------|
| XZ=          | -1.8191     | YZ= | -3.7438 | ZZ=          | 27.1855 |         |
| Eigenvalues: | 24.5138     |     | 26.5290 |              | 33.4063 |         |
| 48 H         | Isotropic = |     | 28.1464 | Anisotropy = |         | 8.3764  |
| XX=          | 30.4595     | YX= | 4.1748  | ZX=          | 1.6186  |         |
| XY=          | 2.8657      | YY= | 28.1531 | ZY=          | 3.0798  |         |
| XZ=          | 1.1091      | YZ= | 1.2301  | ZZ=          | 25.8264 |         |
| Eigenvalues: | 24.4190     |     | 26.2895 |              | 33.7306 |         |
| 49 H         | Isotropic = |     | 30.6873 | Anisotropy = |         | 6.9358  |
| XX=          | 33.3246     | YX= | -2.6969 | ZX=          | 2.7422  |         |
| XY=          | -2.6291     | YY= | 31.2480 | ZY=          | 0.3073  |         |
| XZ=          | 1.4966      | YZ= | 2.0617  | ZZ=          | 27.4892 |         |
| Eigenvalues: | 25.9879     |     | 30.7628 |              | 35.3112 |         |
| 50 H         | Isotropic = |     | 30.6396 | Anisotropy = |         | 8.9545  |
| XX=          | 29.0027     | YX= | -0.3444 | ZX=          | 0.0037  |         |
| XY=          | 0.0113      | YY= | 29.7547 | ZY=          | 4.3489  |         |
| XZ=          | 1.1714      | YZ= | 5.3330  | ZZ=          | 33.1614 |         |
| Eigenvalues: | 26.2438     |     | 29.0657 |              | 36.6093 |         |
| 51 H         | Isotropic = |     | 30.8870 | Anisotropy = |         | 5.4231  |
| XX=          | 32.0143     | YX= | 3.6025  | ZX=          | -1.1722 |         |
| XY=          | 2.7048      | YY= | 30.4582 | ZY=          | 0.6129  |         |
| XZ=          | -1.2082     | YZ= | 1.5658  | ZZ=          | 30.1886 |         |
| Eigenvalues: | 27.1514     |     | 31.0073 |              | 34.5024 |         |
| 52 H         | Isotropic = |     | 31.3955 | Anisotropy = |         | 15.1849 |
| XX=          | 37.3789     | YX= | 2.1402  | ZX=          | -6.8683 |         |
| XY=          | 3.2912      | YY= | 29.4721 | ZY=          | -1.8571 |         |
| XZ=          | -6.6747     | YZ= | -0.5544 | ZZ=          | 27.3354 |         |
| Eigenvalues: | 23.9227     |     | 28.7450 |              | 41.5187 |         |
| 53 H         | Isotropic = |     | 30.3115 | Anisotropy = |         | 7.4974  |
| XX=          | 34.3961     | YX= | -2.1328 | ZX=          | -1.4461 |         |
| XY=          | -2.3348     | YY= | 29.3310 | ZY=          | 2.0463  |         |
| XZ=          | 1.6069      | YZ= | 2.4388  | ZZ=          | 27.2074 |         |
| Eigenvalues: | 25.5922     |     | 30.0325 |              | 35.3097 |         |
| 54 H         | Isotropic = |     | 30.9729 | Anisotropy = |         | 6.0228  |
| XX=          | 28.6553     | YX= | 1.3040  | ZX=          | 1.9289  |         |
| XY=          | 1.5961      | YY= | 34.1487 | ZY=          | -2.2942 |         |
| XZ=          | 2.1950      | YZ= | -1.5704 | ZZ=          | 30.1148 |         |
| Eigenvalues: | 26.4969     |     | 31.4338 |              | 34.9881 |         |
| 55 H         | Isotropic = |     | 30.7742 | Anisotropy = |         | 8.8859  |
| XX=          | 30.7488     | YX= | 1.2986  | ZX=          | 3.8915  |         |
| XY=          | 0.4583      | YY= | 28.9386 | ZY=          | 1.7497  |         |
| XZ=          | 4.2244      | YZ= | 3.3388  | ZZ=          | 32.6352 |         |
| Eigenvalues: | 26.9129     |     | 28.7116 |              | 36.6981 |         |
| 56 H         | Isotropic = |     | 28.5294 | Anisotropy = |         | 9.3883  |
| XX=          | 31.5695     | YX= | -2.6375 | ZX=          | 2.8076  |         |
| XY=          | -2.8660     | YY= | 28.3718 | ZY=          | -0.8228 |         |
| XZ=          | 5.4572      | YZ= | -0.0084 | ZZ=          | 25.6469 |         |
| Eigenvalues: | 23.3434     |     | 27.4565 |              | 34.7883 |         |
| 57 H         | Isotropic = |     | 29.9089 | Anisotropy = |         | 8.9744  |
| XX=          | 34.2238     | YX= | -3.6123 | ZX=          | -0.7840 |         |
| XY=          | -2.9032     | YY= | 29.2542 | ZY=          | -1.9444 |         |
| XZ=          | -0.0128     | YZ= | -2.8535 | ZZ=          | 26.2488 |         |
| Eigenvalues: | 24.4881     |     | 29.3468 |              | 35.8919 |         |
| 58 H         | Isotropic = |     | 29.7959 | Anisotropy = |         | 8.5302  |
| XX=          | 32.8734     | YX= | 0.1627  | ZX=          | 3.8300  |         |
| XY=          | -0.3218     | YY= | 27.7077 | ZY=          | -0.0398 |         |
| XZ=          | 4.5073      | YZ= | -0.4136 | ZZ=          | 28.8067 |         |
| Eigenvalues: | 26.1870     |     | 27.7180 |              | 35.4827 |         |
| 59 H         | Isotropic = |     | 30.1720 | Anisotropy = |         | 9.6628  |
| XX=          | 33.9672     | YX= | -2.5647 | ZX=          | -4.1092 |         |
| XY=          | -2.6999     | YY= | 28.9567 | ZY=          | 0.5502  |         |
| XZ=          | -3.4175     | YZ= | 0.5659  | ZZ=          | 27.5922 |         |
| Eigenvalues: | 25.7071     |     | 28.1951 |              | 36.6139 |         |
| 60 H         | Isotropic = |     | 29.9976 | Anisotropy = |         | 11.5576 |
| XX=          | 27.4224     | YX= | -1.4473 | ZX=          | -0.9831 |         |
| XY=          | -1.4226     | YY= | 35.9186 | ZY=          | 4.3205  |         |
| XZ=          | -0.7335     | YZ= | 3.7798  | ZZ=          | 26.6519 |         |
| Eigenvalues: | 25.0889     |     | 27.2013 |              | 37.7027 |         |
| 61 H         | Isotropic = |     | 30.0402 | Anisotropy = |         | 11.8076 |
| XX=          | 27.8520     | YX= | -2.2071 | ZX=          | 1.5830  |         |
| XY=          | -2.1748     | YY= | 31.9577 | ZY=          | -6.0779 |         |
| XZ=          | 1.6286      | YZ= | -5.9076 | ZZ=          | 30.3108 |         |
| Eigenvalues: | 25.0611     |     | 27.1475 |              | 37.9119 |         |
| 62 H         | Isotropic = |     | 29.9568 | Anisotropy = |         | 7.4637  |
| XX=          | 31.6661     | YX= | 1.4365  | ZX=          | 3.1727  |         |
| XY=          | 1.8786      | YY= | 30.5105 | ZY=          | 2.4793  |         |
| XZ=          | 3.6080      | YZ= | 1.3794  | ZZ=          | 27.6937 |         |
| Eigenvalues: | 25.5793     |     | 29.3585 |              | 34.9325 |         |
| 63 H         | Isotropic = |     | 30.2914 | Anisotropy = |         | 8.2461  |
| XX=          | 31.7390     | YX= | 1.9710  | ZX=          | -3.4774 |         |

|              |             |         |              |     |         |        |
|--------------|-------------|---------|--------------|-----|---------|--------|
| XY=          | 1.9837      | YY=     | 30.8542      | ZY= | -3.0502 |        |
| XZ=          | -2.7178     | YZ=     | -2.9572      | ZZ= | 28.2812 |        |
| Eigenvalues: | 25.7855     |         | 29.3000      |     | 35.7888 |        |
| 64 H         | Isotropic = | 30.7090 | Anisotropy = |     |         | 8.1367 |
| XX=          | 26.4608     | YX=     | 3.3803       | ZX= | 2.2143  |        |
| XY=          | 2.8313      | YY=     | 34.3456      | ZY= | 0.9134  |        |
| XZ=          | 2.0341      | YZ=     | 1.4300       | ZZ= | 31.3205 |        |
| Eigenvalues: | 24.9496     |         | 31.0439      |     | 36.1334 |        |
| 65 H         | Isotropic = | 30.8873 | Anisotropy = |     |         | 8.6788 |
| XX=          | 29.4573     | YX=     | -3.4022      | ZX= | 2.9436  |        |
| XY=          | -2.7772     | YY=     | 28.9006      | ZY= | -0.2938 |        |
| XZ=          | 3.4374      | YZ=     | -1.9463      | ZZ= | 34.3042 |        |
| Eigenvalues: | 25.8249     |         | 30.1639      |     | 36.6732 |        |
| 66 H         | Isotropic = | 31.5149 | Anisotropy = |     |         | 8.9824 |
| XX=          | 31.2275     | YX=     | -0.3106      | ZX= | -2.9758 |        |
| XY=          | -0.3345     | YY=     | 28.1365      | ZY= | -0.4424 |        |
| XZ=          | -4.5885     | YZ=     | -1.2153      | ZZ= | 35.1807 |        |
| Eigenvalues: | 27.7032     |         | 29.3384      |     | 37.5032 |        |
| 67 H         | Isotropic = | 30.9751 | Anisotropy = |     |         | 9.7230 |
| XX=          | 31.7655     | YX=     | -0.6489      | ZX= | -3.9585 |        |
| XY=          | -0.7401     | YY=     | 27.4096      | ZY= | 0.2287  |        |
| XZ=          | -5.0626     | YZ=     | 0.9672       | ZZ= | 33.7501 |        |
| Eigenvalues: | 27.2961     |         | 28.1721      |     | 37.4571 |        |
| 68 H         | Isotropic = | 30.6309 | Anisotropy = |     |         | 8.1622 |
| XX=          | 29.8506     | YX=     | -5.2933      | ZX= | 0.6682  |        |
| XY=          | -4.6351     | YY=     | 29.6750      | ZY= | -1.5146 |        |
| XZ=          | 2.8784      | YZ=     | -1.2402      | ZZ= | 32.3672 |        |
| Eigenvalues: | 24.7883     |         | 31.0321      |     | 36.0724 |        |
| 69 H         | Isotropic = | 30.5474 | Anisotropy = |     |         | 7.5367 |
| XX=          | 27.2805     | YX=     | 0.9211       | ZX= | 0.4126  |        |
| XY=          | 1.4976      | YY=     | 32.0342      | ZY= | 2.5435  |        |
| XZ=          | 1.1915      | YZ=     | 3.7477       | ZZ= | 32.3276 |        |
| Eigenvalues: | 26.9899     |         | 29.0805      |     | 35.5719 |        |
| 70 H         | Isotropic = | 30.2736 | Anisotropy = |     |         | 6.3861 |
| XX=          | 29.5758     | YX=     | -4.5134      | ZX= | -0.4671 |        |
| XY=          | -3.9568     | YY=     | 30.7910      | ZY= | -0.1399 |        |
| XZ=          | -0.1762     | YZ=     | 0.9871       | ZZ= | 30.4540 |        |
| Eigenvalues: | 25.9047     |         | 30.3852      |     | 34.5310 |        |
| 71 H         | Isotropic = | 30.6864 | Anisotropy = |     |         | 7.5693 |
| XX=          | 32.2600     | YX=     | 3.2904       | ZX= | -1.4256 |        |
| XY=          | 3.3126      | YY=     | 29.6891      | ZY= | -1.9571 |        |
| XZ=          | -1.3411     | YZ=     | -3.0887      | ZZ= | 30.1100 |        |
| Eigenvalues: | 26.7554     |         | 29.5711      |     | 35.7326 |        |
| 72 H         | Isotropic = | 30.5841 | Anisotropy = |     |         | 9.0406 |
| XX=          | 28.5115     | YX=     | -0.7959      | ZX= | 1.5685  |        |
| XY=          | -0.3375     | YY=     | 27.1340      | ZY= | -0.2683 |        |
| XZ=          | 2.2815      | YZ=     | -0.7916      | ZZ= | 36.1068 |        |
| Eigenvalues: | 26.9275     |         | 28.2136      |     | 36.6111 |        |

**Chemical Shielding tensors (GIAO mpw1pw91/6-311+g(2d,p) iefpcm = DMSO) 3R\*,7S\*,11R\*-1b**  
**Conf. C (51 %)**

|    |   |              |          |              |          |
|----|---|--------------|----------|--------------|----------|
| 1  | C | Isotropic =  | 73.0079  | Anisotropy = | 130.2652 |
|    |   | XX=          | 57.5284  | YX=          | -38.5595 |
|    |   | XY=          | -16.7236 | YY=          | 3.2836   |
|    |   | XZ=          | -10.4714 | YZ=          | 6.7006   |
|    |   |              |          | ZZ=          | 158.2118 |
|    |   | Eigenvalues: | -8.4084  | 67.5808      | 159.8514 |
| 2  | C | Isotropic =  | 27.4782  | Anisotropy = | 127.9972 |
|    |   | XX=          | -48.6699 | YX=          | -6.4531  |
|    |   | XY=          | -4.3926  | YY=          | 20.2328  |
|    |   | XZ=          | -15.0426 | YZ=          | 4.5975   |
|    |   |              |          | ZZ=          | 110.8716 |
|    |   | Eigenvalues: | -50.5850 | 20.2098      | 112.8097 |
| 3  | C | Isotropic =  | 67.0475  | Anisotropy = | 126.5704 |
|    |   | XX=          | 39.2303  | YX=          | 37.6330  |
|    |   | XY=          | 29.1019  | YY=          | 12.6136  |
|    |   | XZ=          | -8.4968  | YZ=          | 16.9703  |
|    |   |              |          | ZZ=          | 149.2987 |
|    |   | Eigenvalues: | -12.1245 | 61.8392      | 151.4278 |
| 4  | C | Isotropic =  | 60.3953  | Anisotropy = | 170.1491 |
|    |   | XX=          | 22.7798  | YX=          | -24.1575 |
|    |   | XY=          | -12.9694 | YY=          | -11.5147 |
|    |   | XZ=          | -29.8361 | YZ=          | 7.7003   |
|    |   |              |          | ZZ=          | 169.9207 |
|    |   | Eigenvalues: | -19.6425 | 27.0004      | 173.8280 |
| 5  | C | Isotropic =  | 35.0441  | Anisotropy = | 118.1987 |
|    |   | XX=          | -42.4376 | YX=          | -11.9452 |
|    |   | XY=          | -4.9980  | YY=          | 36.8709  |
|    |   | XZ=          | -17.5302 | YZ=          | 13.1352  |
|    |   |              |          | ZZ=          | 110.6992 |
|    |   | Eigenvalues: | -44.9248 | 36.2140      | 113.8432 |
| 6  | C | Isotropic =  | 54.6002  | Anisotropy = | 162.3293 |
|    |   | XX=          | 12.2245  | YX=          | 27.4552  |
|    |   | XY=          | 18.7502  | YY=          | -8.5918  |
|    |   | XZ=          | -15.7438 | YZ=          | 12.7831  |
|    |   |              |          | ZZ=          | 160.1678 |
|    |   | Eigenvalues: | -25.8658 | 26.8466      | 162.8197 |
| 7  | C | Isotropic =  | 160.8352 | Anisotropy = | 19.6159  |
|    |   | XX=          | 165.3486 | YX=          | 6.0554   |
|    |   | XY=          | 11.4631  | YY=          | 163.9637 |
|    |   | XZ=          | -2.6123  | YZ=          | 3.0794   |
|    |   |              |          | ZZ=          | 153.1932 |
|    |   | Eigenvalues: | 151.1475 | 157.4456     | 173.9125 |
| 8  | C | Isotropic =  | 150.2228 | Anisotropy = | 27.1263  |
|    |   | XX=          | 151.3529 | YX=          | -10.5856 |
|    |   | XY=          | -14.5808 | YY=          | 152.1966 |
|    |   | XZ=          | -10.5302 | YZ=          | -0.4492  |
|    |   |              |          | ZZ=          | 147.1191 |
|    |   | Eigenvalues: | 138.3959 | 143.9656     | 168.3070 |
| 9  | C | Isotropic =  | 104.9797 | Anisotropy = | 50.2518  |
|    |   | XX=          | 102.1096 | YX=          | 25.8874  |
|    |   | XY=          | 24.1900  | YY=          | 118.2471 |
|    |   | XZ=          | 1.5233   | YZ=          | -10.5577 |
|    |   |              |          | ZZ=          | 94.5823  |
|    |   | Eigenvalues: | 82.2517  | 94.2065      | 138.4809 |
| 10 | O | Isotropic =  | 187.3909 | Anisotropy = | 122.2331 |
|    |   | XX=          | 163.2115 | YX=          | 3.2647   |
|    |   | XY=          | -17.7980 | YY=          | 131.2862 |
|    |   | XZ=          | 21.2564  | YZ=          | -22.5791 |
|    |   |              |          | ZZ=          | 267.6751 |
|    |   | Eigenvalues: | 129.0539 | 164.2392     | 268.8797 |
| 11 | C | Isotropic =  | 143.1199 | Anisotropy = | 44.5514  |
|    |   | XX=          | 140.9389 | YX=          | 20.5711  |
|    |   | XY=          | 18.4145  | YY=          | 145.0750 |
|    |   | XZ=          | 25.1117  | YZ=          | 7.0672   |
|    |   |              |          | ZZ=          | 143.3458 |
|    |   | Eigenvalues: | 115.2220 | 141.3169     | 172.8209 |
| 12 | C | Isotropic =  | 44.9424  | Anisotropy = | 136.7154 |
|    |   | XX=          | 63.4490  | YX=          | 24.4057  |
|    |   | XY=          | 19.0253  | YY=          | -41.5718 |
|    |   | XZ=          | 35.3326  | YZ=          | 8.4388   |
|    |   |              |          | ZZ=          | 112.9501 |
|    |   | Eigenvalues: | -45.9157 | 44.6569      | 136.0860 |
| 13 | C | Isotropic =  | 22.3183  | Anisotropy = | 188.7687 |
|    |   | XX=          | 41.2846  | YX=          | 43.5690  |
|    |   | XY=          | 35.0383  | YY=          | -77.0500 |
|    |   | XZ=          | 71.6283  | YZ=          | -1.5887  |
|    |   |              |          | ZZ=          | 102.7203 |
|    |   | Eigenvalues: | -89.7269 | 8.5177       | 148.1641 |
| 14 | C | Isotropic =  | 134.6467 | Anisotropy = | 33.3728  |
|    |   | XX=          | 145.4677 | YX=          | -18.0763 |
|    |   | XY=          | -10.1875 | YY=          | 127.2055 |
|    |   | XZ=          | 14.9575  | YZ=          | -1.1094  |
|    |   |              |          | ZZ=          | 131.2669 |
|    |   | Eigenvalues: | 114.8789 | 132.1659     | 156.8952 |
| 15 | C | Isotropic =  | 166.0767 | Anisotropy = | 25.9504  |
|    |   | XX=          | 167.6067 | YX=          | -7.9832  |
|    |   | XY=          | -9.6072  | YY=          | 177.9576 |
|    |   | XZ=          | 1.5027   | YZ=          | -3.1194  |
|    |   |              |          | ZZ=          | 152.6658 |
|    |   | Eigenvalues: | 152.2642 | 162.5889     | 183.3770 |
| 16 | O | Isotropic =  | 235.7343 | Anisotropy = | 77.7012  |

|              |             |           |              |     |          |          |
|--------------|-------------|-----------|--------------|-----|----------|----------|
| XX=          | 274.9535    | YX=       | -18.6078     | ZX= | 1.3261   |          |
| XY=          | -61.5843    | YY=       | 157.7340     | ZY= | 1.9137   |          |
| XZ=          | 3.9241      | YZ=       | 4.7821       | ZZ= | 274.5153 |          |
| Eigenvalues: | 145.2090    |           | 274.4588     |     | 287.5351 |          |
| 17 C         | Isotropic = | 132.1058  | Anisotropy = |     |          | 72.4368  |
| XX=          | 127.9063    | YX=       | 37.3265      | ZX= | -1.0627  |          |
| XY=          | 32.8998     | YY=       | 156.9081     | ZY= | 0.1716   |          |
| XZ=          | -0.5745     | YZ=       | 0.6351       | ZZ= | 111.5031 |          |
| Eigenvalues: | 104.3039    |           | 111.6166     |     | 180.3970 |          |
| 18 C         | Isotropic = | 108.1374  | Anisotropy = |     |          | 52.7121  |
| XX=          | 98.0731     | YX=       | 16.9807      | ZX= | -6.2954  |          |
| XY=          | 14.5452     | YY=       | 127.8734     | ZY= | -20.0959 |          |
| XZ=          | -4.0002     | YZ=       | -18.1825     | ZZ= | 98.4656  |          |
| Eigenvalues: | 87.8717     |           | 93.2617      |     | 143.2788 |          |
| 19 C         | Isotropic = | 158.8707  | Anisotropy = |     |          | 35.1862  |
| XX=          | 158.7471    | YX=       | -5.8971      | ZX= | -9.5257  |          |
| XY=          | -10.6278    | YY=       | 148.5630     | ZY= | 9.7810   |          |
| XZ=          | -12.8491    | YZ=       | 13.2513      | ZZ= | 169.3019 |          |
| Eigenvalues: | 142.5705    |           | 151.7134     |     | 182.3281 |          |
| 20 O         | Isotropic = | 220.9344  | Anisotropy = |     |          | 70.8849  |
| XX=          | 198.6176    | YX=       | 12.7428      | ZX= | -22.5803 |          |
| XY=          | 12.3554     | YY=       | 231.9384     | ZY= | -20.8350 |          |
| XZ=          | -23.6088    | YZ=       | -32.8381     | ZZ= | 232.2472 |          |
| Eigenvalues: | 186.8323    |           | 207.7800     |     | 268.1910 |          |
| 21 C         | Isotropic = | 155.6480  | Anisotropy = |     |          | 36.7163  |
| XX=          | 170.2669    | YX=       | -17.9568     | ZX= | 1.6157   |          |
| XY=          | -13.8988    | YY=       | 153.2833     | ZY= | -0.9552  |          |
| XZ=          | 5.5602      | YZ=       | 0.0128       | ZZ= | 143.3938 |          |
| Eigenvalues: | 141.9387    |           | 144.8797     |     | 180.1255 |          |
| 22 C         | Isotropic = | -25.5426  | Anisotropy = |     |          | 182.7539 |
| XX=          | -33.5054    | YX=       | 12.4670      | ZX= | 79.3696  |          |
| XY=          | 18.8430     | YY=       | -98.0473     | ZY= | -17.7881 |          |
| XZ=          | 66.0933     | YZ=       | -21.4988     | ZZ= | 54.9249  |          |
| Eigenvalues: | -112.6424   |           | -60.2787     |     | 96.2934  |          |
| 23 C         | Isotropic = | 126.9025  | Anisotropy = |     |          | 28.3341  |
| XX=          | 119.0791    | YX=       | -3.1580      | ZX= | -8.4753  |          |
| XY=          | -2.0598     | YY=       | 138.5278     | ZY= | -5.3493  |          |
| XZ=          | -6.6323     | YZ=       | -20.1328     | ZZ= | 123.1007 |          |
| Eigenvalues: | 109.4581    |           | 125.4575     |     | 145.7920 |          |
| 24 C         | Isotropic = | 137.3610  | Anisotropy = |     |          | 24.3589  |
| XX=          | 132.3253    | YX=       | -3.8679      | ZX= | -14.1940 |          |
| XY=          | -4.9048     | YY=       | 148.7572     | ZY= | -1.4576  |          |
| XZ=          | -20.6300    | YZ=       | 5.7469       | ZZ= | 131.0004 |          |
| Eigenvalues: | 114.1723    |           | 144.3104     |     | 153.6002 |          |
| 25 C         | Isotropic = | 138.4951  | Anisotropy = |     |          | 31.6496  |
| XX=          | 131.1780    | YX=       | -10.1673     | ZX= | 6.8280   |          |
| XY=          | -17.4671    | YY=       | 151.4785     | ZY= | -5.5820  |          |
| XZ=          | 7.4904      | YZ=       | 0.7294       | ZZ= | 132.8289 |          |
| Eigenvalues: | 121.5215    |           | 134.3690     |     | 159.5949 |          |
| 26 C         | Isotropic = | 153.9629  | Anisotropy = |     |          | 32.4084  |
| XX=          | 152.8524    | YX=       | -8.8986      | ZX= | -13.0662 |          |
| XY=          | -17.5336    | YY=       | 166.9471     | ZY= | -10.6592 |          |
| XZ=          | -5.7275     | YZ=       | -10.7803     | ZZ= | 142.0893 |          |
| Eigenvalues: | 129.6258    |           | 156.6945     |     | 175.5685 |          |
| 27 C         | Isotropic = | 164.6807  | Anisotropy = |     |          | 28.6275  |
| XX=          | 165.0217    | YX=       | -4.2470      | ZX= | -23.7165 |          |
| XY=          | -4.3901     | YY=       | 174.0806     | ZY= | -7.5487  |          |
| XZ=          | -22.5425    | YZ=       | -6.2563      | ZZ= | 154.9397 |          |
| Eigenvalues: | 134.6499    |           | 175.6264     |     | 183.7657 |          |
| 28 C         | Isotropic = | 148.9495  | Anisotropy = |     |          | 43.0287  |
| XX=          | 140.9260    | YX=       | -2.5005      | ZX= | -13.0291 |          |
| XY=          | 3.3670      | YY=       | 177.5164     | ZY= | 1.0375   |          |
| XZ=          | -7.5811     | YZ=       | 3.7974       | ZZ= | 128.4060 |          |
| Eigenvalues: | 122.5107    |           | 146.7025     |     | 177.6353 |          |
| 29 C         | Isotropic = | 164.4742  | Anisotropy = |     |          | 38.2864  |
| XX=          | 163.9766    | YX=       | 8.5737       | ZX= | 14.0274  |          |
| XY=          | 9.5442      | YY=       | 150.4198     | ZY= | 6.6888   |          |
| XZ=          | 13.6801     | YZ=       | 6.5569       | ZZ= | 179.0264 |          |
| Eigenvalues: | 145.8805    |           | 157.5437     |     | 189.9985 |          |
| 30 C         | Isotropic = | 163.5892  | Anisotropy = |     |          | 34.7085  |
| XX=          | 169.4751    | YX=       | -7.1366      | ZX= | 15.0744  |          |
| XY=          | -2.4746     | YY=       | 149.5445     | ZY= | 7.3282   |          |
| XZ=          | 16.9184     | YZ=       | 6.2043       | ZZ= | 171.7480 |          |
| Eigenvalues: | 143.5089    |           | 160.5304     |     | 186.7281 |          |
| 31 O         | Isotropic = | -283.0845 | Anisotropy = |     |          | 960.9268 |
| XX=          | -532.5320   | YX=       | -56.9332     | ZX= | 535.4594 |          |
| XY=          | -36.2534    | YY=       | -360.6674    | ZY= | -7.1250  |          |
| XZ=          | 519.2439    | YZ=       | 5.2367       | ZZ= | 43.9458  |          |
| Eigenvalues: | -848.4938   |           | -358.2931    |     | 357.5333 |          |



|              |          |             |          |              |          |
|--------------|----------|-------------|----------|--------------|----------|
| 32           | C        | Isotropic = | 166.9124 | Anisotropy = | 30.3950  |
| XX=          | 150.2187 | YX=         | 4.9944   | ZX=          | -6.4653  |
| XY=          | 7.0776   | YY=         | 166.7057 | ZY=          | -3.1517  |
| XZ=          | -11.0790 | YZ=         | -3.9739  | ZZ=          | 183.8128 |
| Eigenvalues: | 146.7658 |             | 166.7956 |              | 187.1757 |
| 33           | H        | Isotropic = | 25.1094  | Anisotropy = | 9.8863   |
| XX=          | 30.8577  | YX=         | -2.2837  | ZX=          | 1.0969   |
| XY=          | -2.2819  | YY=         | 24.1926  | ZY=          | -0.5640  |
| XZ=          | 1.1351   | YZ=         | -0.6429  | ZZ=          | 20.2779  |
| Eigenvalues: | 20.1244  |             | 23.5035  |              | 31.7003  |
| 34           | H        | Isotropic = | 24.9025  | Anisotropy = | 8.3277   |
| XX=          | 29.1253  | YX=         | 2.4899   | ZX=          | 0.5006   |
| XY=          | 2.7719   | YY=         | 25.2009  | ZY=          | -0.0227  |
| XZ=          | 0.1203   | YZ=         | 0.1367   | ZZ=          | 20.3813  |
| Eigenvalues: | 20.3700  |             | 23.8833  |              | 30.4543  |
| 35           | H        | Isotropic = | 29.0082  | Anisotropy = | 10.2132  |
| XX=          | 31.8583  | YX=         | -2.9853  | ZX=          | -1.1252  |
| XY=          | -3.7038  | YY=         | 30.9538  | ZY=          | 2.7938   |
| XZ=          | -1.4311  | YZ=         | 4.5973   | ZZ=          | 24.2126  |
| Eigenvalues: | 22.5773  |             | 28.6304  |              | 35.8171  |
| 36           | H        | Isotropic = | 28.7777  | Anisotropy = | 7.5737   |
| XX=          | 29.2918  | YX=         | -0.6482  | ZX=          | 1.4248   |
| XY=          | -1.4071  | YY=         | 28.3297  | ZY=          | -3.9082  |
| XZ=          | 0.6662   | YZ=         | -5.7490  | ZZ=          | 28.7114  |
| Eigenvalues: | 23.6881  |             | 28.8180  |              | 33.8268  |
| 37           | H        | Isotropic = | 29.8770  | Anisotropy = | 5.7748   |
| XX=          | 30.0894  | YX=         | -2.3519  | ZX=          | -0.2612  |
| XY=          | -1.8071  | YY=         | 27.0570  | ZY=          | 2.8272   |
| XZ=          | 1.4966   | YZ=         | 2.8727   | ZZ=          | 32.4845  |
| Eigenvalues: | 24.9338  |             | 30.9704  |              | 33.7268  |
| 38           | H        | Isotropic = | 30.0127  | Anisotropy = | 6.9917   |
| XX=          | 31.4646  | YX=         | 1.3591   | ZX=          | 0.5119   |
| XY=          | 1.5752   | YY=         | 33.9828  | ZY=          | 0.6541   |
| XZ=          | 0.4130   | YZ=         | -0.1743  | ZZ=          | 24.5908  |
| Eigenvalues: | 24.5577  |             | 30.8067  |              | 34.6738  |
| 39           | H        | Isotropic = | 29.3305  | Anisotropy = | 7.6889   |
| XX=          | 34.2482  | YX=         | 0.7618   | ZX=          | 0.6025   |
| XY=          | 1.1698   | YY=         | 28.1467  | ZY=          | -0.7659  |
| XZ=          | 1.4549   | YZ=         | -3.5182  | ZZ=          | 25.5965  |
| Eigenvalues: | 24.1913  |             | 29.3437  |              | 34.4564  |
| 40           | H        | Isotropic = | 28.9764  | Anisotropy = | 3.1933   |
| XX=          | 27.2962  | YX=         | -0.4437  | ZX=          | -0.2501  |
| XY=          | 1.5944   | YY=         | 29.2379  | ZY=          | 1.1559   |
| XZ=          | -2.6586  | YZ=         | 0.3333   | ZZ=          | 30.3952  |
| Eigenvalues: | 26.4788  |             | 29.3452  |              | 31.1053  |
| 41           | H        | Isotropic = | 29.4343  | Anisotropy = | 2.3301   |
| XX=          | 29.2778  | YX=         | -1.2640  | ZX=          | 1.1545   |
| XY=          | -2.3920  | YY=         | 28.4040  | ZY=          | 1.1019   |
| XZ=          | 0.3259   | YZ=         | 0.1397   | ZZ=          | 30.6210  |
| Eigenvalues: | 26.7308  |             | 30.5843  |              | 30.9877  |
| 42           | H        | Isotropic = | 28.4706  | Anisotropy = | 10.7037  |
| XX=          | 34.5016  | YX=         | 1.8773   | ZX=          | 0.2904   |
| XY=          | 3.5426   | YY=         | 28.8580  | ZY=          | 1.0515   |
| XZ=          | -0.5026  | YZ=         | 1.8121   | ZZ=          | 22.0522  |
| Eigenvalues: | 21.7287  |             | 28.0767  |              | 35.6064  |
| 43           | H        | Isotropic = | 29.8549  | Anisotropy = | 8.5272   |
| XX=          | 31.9242  | YX=         | 1.4875   | ZX=          | 0.3640   |
| XY=          | 3.3745   | YY=         | 33.8870  | ZY=          | -0.5776  |
| XZ=          | 0.2958   | YZ=         | -0.7909  | ZZ=          | 23.7535  |
| Eigenvalues: | 23.6760  |             | 30.3490  |              | 35.5397  |
| 44           | H        | Isotropic = | 29.3082  | Anisotropy = | 6.9391   |
| XX=          | 31.1774  | YX=         | 0.6208   | ZX=          | 2.8386   |
| XY=          | -0.4487  | YY=         | 28.3859  | ZY=          | -2.3076  |
| XZ=          | 4.1749   | YZ=         | -2.8790  | ZZ=          | 28.3614  |
| Eigenvalues: | 24.6288  |             | 29.3616  |              | 33.9343  |
| 45           | H        | Isotropic = | 29.3722  | Anisotropy = | 8.4806   |
| XX=          | 33.1462  | YX=         | -0.3522  | ZX=          | -3.0723  |
| XY=          | -1.4516  | YY=         | 29.1553  | ZY=          | 1.4993   |
| XZ=          | -3.9766  | YZ=         | 2.6425   | ZZ=          | 25.8150  |
| Eigenvalues: | 23.8954  |             | 29.1952  |              | 35.0259  |
| 46           | H        | Isotropic = | 27.8926  | Anisotropy = | 8.9922   |
| XX=          | 33.1264  | YX=         | 1.0999   | ZX=          | 0.9007   |
| XY=          | 3.2154   | YY=         | 27.1875  | ZY=          | 0.0595   |
| XZ=          | 0.7986   | YZ=         | -0.1553  | ZZ=          | 23.3639  |
| Eigenvalues: | 23.2747  |             | 26.5157  |              | 33.8874  |
| 47           | H        | Isotropic = | 28.1684  | Anisotropy = | 8.1302   |
| XX=          | 28.2530  | YX=         | 3.4375   | ZX=          | -2.1063  |
| XY=          | 1.3631   | YY=         | 29.3897  | ZY=          | -3.9348  |
| XZ=          | -1.8902  | YZ=         | -2.9029  | ZZ=          | 26.8625  |

|              |             |         |              |         |
|--------------|-------------|---------|--------------|---------|
| Eigenvalues: | 24.4522     | 26.4644 | 33.5885      |         |
| 48 H         | Isotropic = | 28.1713 | Anisotropy = | 8.0574  |
| XX=          | 27.5153     | YX=     | 3.0758       | ZX=     |
| XY=          | 0.8365      | YY=     | 30.3674      | ZY=     |
| XZ=          | 1.9009      | YZ=     | 3.1718       | ZZ=     |
| Eigenvalues: | 24.4496     | 26.5214 | 33.5429      |         |
| 49 H         | Isotropic = | 30.6455 | Anisotropy = | 6.9216  |
| XX=          | 33.4565     | YX=     | -1.8354      | ZX=     |
| XY=          | -2.3532     | YY=     | 31.4297      | ZY=     |
| XZ=          | -1.5020     | YZ=     | 3.1132       | ZZ=     |
| Eigenvalues: | 26.0083     | 30.6683 | 35.2599      |         |
| 50 H         | Isotropic = | 30.5882 | Anisotropy = | 9.0934  |
| XX=          | 30.2629     | YX=     | 2.0287       | ZX=     |
| XY=          | 2.0423      | YY=     | 29.7907      | ZY=     |
| XZ=          | 2.8878      | YZ=     | 4.7810       | ZZ=     |
| Eigenvalues: | 26.3516     | 28.7625 | 36.6504      |         |
| 51 H         | Isotropic = | 30.7744 | Anisotropy = | 4.8303  |
| XX=          | 29.9846     | YX=     | 3.5350       | ZX=     |
| XY=          | 2.6443      | YY=     | 30.5825      | ZY=     |
| XZ=          | -1.1938     | YZ=     | -0.4361      | ZZ=     |
| Eigenvalues: | 27.1425     | 31.1861 | 33.9946      |         |
| 52 H         | Isotropic = | 31.3800 | Anisotropy = | 14.9508 |
| XX=          | 29.3903     | YX=     | 1.5306       | ZX=     |
| XY=          | 1.9775      | YY=     | 29.4177      | ZY=     |
| XZ=          | -7.7126     | YZ=     | -1.4409      | ZZ=     |
| Eigenvalues: | 24.0553     | 28.7376 | 41.3472      |         |
| 53 H         | Isotropic = | 30.2726 | Anisotropy = | 7.3238  |
| XX=          | 32.6673     | YX=     | -0.7978      | ZX=     |
| XY=          | -1.0803     | YY=     | 29.3997      | ZY=     |
| XZ=          | -1.4002     | YZ=     | 3.1633       | ZZ=     |
| Eigenvalues: | 25.6284     | 30.0344 | 35.1552      |         |
| 54 H         | Isotropic = | 30.9075 | Anisotropy = | 6.2575  |
| XX=          | 30.5058     | YX=     | 0.3807       | ZX=     |
| XY=          | 0.3832      | YY=     | 34.1931      | ZY=     |
| XZ=          | 1.8733      | YZ=     | -2.0963      | ZZ=     |
| Eigenvalues: | 26.3242     | 31.3191 | 35.0791      |         |
| 55 H         | Isotropic = | 30.7385 | Anisotropy = | 8.8674  |
| XX=          | 34.5455     | YX=     | 2.5987       | ZX=     |
| XY=          | 1.1932      | YY=     | 28.9500      | ZY=     |
| XZ=          | 3.1977      | YZ=     | 2.2139       | ZZ=     |
| Eigenvalues: | 26.8827     | 28.6826 | 36.6501      |         |
| 56 H         | Isotropic = | 28.2364 | Anisotropy = | 10.5175 |
| XX=          | 34.4100     | YX=     | -1.7762      | ZX=     |
| XY=          | -2.7328     | YY=     | 28.0561      | ZY=     |
| XZ=          | 2.1545      | YZ=     | 1.1762       | ZZ=     |
| Eigenvalues: | 21.9291     | 27.5321 | 35.2481      |         |
| 57 H         | Isotropic = | 29.4575 | Anisotropy = | 5.5351  |
| XX=          | 29.8325     | YX=     | -3.6672      | ZX=     |
| XY=          | -2.7969     | YY=     | 29.2573      | ZY=     |
| XZ=          | -2.5437     | YZ=     | -0.7389      | ZZ=     |
| Eigenvalues: | 25.2658     | 29.9592 | 33.1476      |         |
| 58 H         | Isotropic = | 29.7450 | Anisotropy = | 8.5153  |
| XX=          | 35.3837     | YX=     | -0.0599      | ZX=     |
| XY=          | -0.3512     | YY=     | 27.7121      | ZY=     |
| XZ=          | 0.7690      | YZ=     | -0.4788      | ZZ=     |
| Eigenvalues: | 26.0796     | 27.7335 | 35.4218      |         |
| 59 H         | Isotropic = | 30.1553 | Anisotropy = | 9.4743  |
| XX=          | 29.2040     | YX=     | -1.9347      | ZX=     |
| XY=          | -2.1188     | YY=     | 29.0251      | ZY=     |
| XZ=          | -4.3209     | YZ=     | 1.8550       | ZZ=     |
| Eigenvalues: | 25.7988     | 28.1956 | 36.4715      |         |
| 60 H         | Isotropic = | 29.9751 | Anisotropy = | 11.4731 |
| XX=          | 26.6113     | YX=     | 0.7855       | ZX=     |
| XY=          | 0.9755      | YY=     | 35.9113      | ZY=     |
| XZ=          | -0.5508     | YZ=     | 3.9647       | ZZ=     |
| Eigenvalues: | 25.1849     | 27.1166 | 37.6239      |         |
| 61 H         | Isotropic = | 29.9889 | Anisotropy = | 11.8254 |
| XX=          | 29.6344     | YX=     | -4.6180      | ZX=     |
| XY=          | -4.7852     | YY=     | 31.9943      | ZY=     |
| XZ=          | 1.9444      | YZ=     | -4.1030      | ZZ=     |
| Eigenvalues: | 25.1159     | 26.9782 | 37.8724      |         |
| 62 H         | Isotropic = | 29.9083 | Anisotropy = | 8.0466  |
| XX=          | 33.9882     | YX=     | 2.1015       | ZX=     |
| XY=          | 2.7417      | YY=     | 30.3265      | ZY=     |
| XZ=          | 0.7295      | YZ=     | 0.3431       | ZZ=     |
| Eigenvalues: | 25.3196     | 29.1327 | 35.2727      |         |
| 63 H         | Isotropic = | 30.1990 | Anisotropy = | 8.4252  |
| XX=          | 28.0173     | YX=     | 0.8017       | ZX=     |
| XY=          | 0.4645      | YY=     | 30.7074      | ZY=     |

|              |             |     |         |              |         |        |
|--------------|-------------|-----|---------|--------------|---------|--------|
| XZ=          | -2.4900     | YZ= | -3.5215 | ZZ=          | 31.8723 |        |
| Eigenvalues: | 26.1518     |     | 28.6295 |              | 35.8159 |        |
| 64 H         | Isotropic = |     | 30.5508 | Anisotropy = |         | 8.4455 |
| XX=          | 28.9129     | YX= | 3.8499  | ZX=          | 3.6697  |        |
| XY=          | 3.1430      | YY= | 34.3276 | ZY=          | -0.7382 |        |
| XZ=          | 3.1731      | YZ= | -0.4981 | ZZ=          | 28.4118 |        |
| Eigenvalues: | 24.3742     |     | 31.0970 |              | 36.1811 |        |
| 65 H         | Isotropic = |     | 30.7782 | Anisotropy = |         | 8.5857 |
| XX=          | 32.9706     | YX= | -3.7384 | ZX=          | 3.7714  |        |
| XY=          | -2.4351     | YY= | 28.9516 | ZY=          | 0.9924  |        |
| XZ=          | 4.0258      | YZ= | -0.0643 | ZZ=          | 30.4125 |        |
| Eigenvalues: | 25.7929     |     | 30.0398 |              | 36.5020 |        |
| 66 H         | Isotropic = |     | 31.3150 | Anisotropy = |         | 9.5697 |
| XX=          | 28.1106     | YX= | -0.4218 | ZX=          | 0.8971  |        |
| XY=          | -0.1924     | YY= | 28.1770 | ZY=          | -0.3131 |        |
| XZ=          | -1.0392     | YZ= | -0.8761 | ZZ=          | 37.6574 |        |
| Eigenvalues: | 27.8138     |     | 28.4363 |              | 37.6948 |        |
| 67 H         | Isotropic = |     | 30.9936 | Anisotropy = |         | 9.3942 |
| XX=          | 28.5935     | YX= | -0.1148 | ZX=          | -0.7182 |        |
| XY=          | -0.6357     | YY= | 27.4593 | ZY=          | 0.5100  |        |
| XZ=          | -2.1691     | YZ= | 1.2175  | ZZ=          | 36.9281 |        |
| Eigenvalues: | 27.3244     |     | 28.4001 |              | 37.2564 |        |
| 68 H         | Isotropic = |     | 30.6369 | Anisotropy = |         | 8.5355 |
| XX=          | 32.3511     | YX= | -5.0470 | ZX=          | 1.2633  |        |
| XY=          | -4.8429     | YY= | 29.8471 | ZY=          | 0.7827  |        |
| XZ=          | 2.7445      | YZ= | 1.4809  | ZZ=          | 29.7124 |        |
| Eigenvalues: | 25.0218     |     | 30.5617 |              | 36.3272 |        |
| 69 H         | Isotropic = |     | 30.5598 | Anisotropy = |         | 7.4813 |
| XX=          | 29.6697     | YX= | 2.6370  | ZX=          | 2.4786  |        |
| XY=          | 2.4186      | YY= | 31.9639 | ZY=          | 1.3488  |        |
| XZ=          | 2.8538      | YZ= | 2.9045  | ZZ=          | 30.0459 |        |
| Eigenvalues: | 27.1289     |     | 29.0032 |              | 35.5474 |        |
| 70 H         | Isotropic = |     | 30.6395 | Anisotropy = |         | 6.9755 |
| XX=          | 31.5081     | YX= | -3.7370 | ZX=          | -0.0760 |        |
| XY=          | -3.9682     | YY= | 30.2950 | ZY=          | 1.1424  |        |
| XZ=          | -1.5197     | YZ= | 1.8608  | ZZ=          | 30.1153 |        |
| Eigenvalues: | 26.8691     |     | 29.7595 |              | 35.2898 |        |
| 71 H         | Isotropic = |     | 31.0427 | Anisotropy = |         | 8.9025 |
| XX=          | 31.3619     | YX= | 1.8594  | ZX=          | -1.6810 |        |
| XY=          | 2.5648      | YY= | 31.9928 | ZY=          | -3.7826 |        |
| XZ=          | -1.9069     | YZ= | -5.2498 | ZZ=          | 29.7735 |        |
| Eigenvalues: | 26.2321     |     | 29.9183 |              | 36.9777 |        |
| 72 H         | Isotropic = |     | 30.3675 | Anisotropy = |         | 6.0273 |
| XX=          | 32.7022     | YX= | -0.7170 | ZX=          | 1.8205  |        |
| XY=          | -0.5132     | YY= | 25.7017 | ZY=          | 0.2137  |        |
| XZ=          | 1.3290      | YZ= | -1.7538 | ZZ=          | 32.6987 |        |
| Eigenvalues: | 25.5891     |     | 31.1278 |              | 34.3857 |        |

**Chemical Shielding tensors (GIAO MPW1PW91/6-311+G(2d,p) iefpcm = DMSO)**  
**3S\*,7S\*,11R\*-1b**

**Conf 1 (7 %)**

|    |   |              |          |              |          |
|----|---|--------------|----------|--------------|----------|
| 1  | C | Isotropic =  | 72.9906  | Anisotropy = | 131.2719 |
|    |   | XX=          | 28.1905  | YX=          | 6.9320   |
|    |   | XY=          | 4.0834   | YY=          | 159.4458 |
|    |   | XZ=          | 26.2074  | YZ=          | -10.9652 |
|    |   |              |          | ZZ=          | 31.3355  |
|    |   | Eigenvalues: | -8.1010  | 66.5675      | 160.5052 |
| 2  | C | Isotropic =  | 27.5613  | Anisotropy = | 128.0513 |
|    |   | XX=          | -41.9334 | YX=          | 2.1406   |
|    |   | XY=          | 3.0093   | YY=          | 112.4653 |
|    |   | XZ=          | -24.3616 | YZ=          | -6.9132  |
|    |   |              |          | ZZ=          | 12.1522  |
|    |   | Eigenvalues: | -50.6190 | 20.3742      | 112.9289 |
| 3  | C | Isotropic =  | 67.3117  | Anisotropy = | 126.7950 |
|    |   | XX=          | 60.2138  | YX=          | 2.0452   |
|    |   | XY=          | 8.1704   | YY=          | 150.5403 |
|    |   | XZ=          | -9.8400  | YZ=          | -11.4578 |
|    |   |              |          | ZZ=          | -8.8190  |
|    |   | Eigenvalues: | -12.2874 | 62.3808      | 151.8417 |
| 4  | C | Isotropic =  | 60.4741  | Anisotropy = | 169.0697 |
|    |   | XX=          | 2.8342   | YX=          | 6.2143   |
|    |   | XY=          | -8.6523  | YY=          | 171.9420 |
|    |   | XZ=          | 17.8055  | YZ=          | -10.9683 |
|    |   |              |          | ZZ=          | 6.6462   |
|    |   | Eigenvalues: | -18.9869 | 27.2221      | 173.1872 |
| 5  | C | Isotropic =  | 35.3477  | Anisotropy = | 118.5155 |
|    |   | XX=          | -36.0729 | YX=          | 3.1224   |
|    |   | XY=          | 3.8634   | YY=          | 112.8033 |
|    |   | XZ=          | -29.5829 | YZ=          | -6.3412  |
|    |   |              |          | ZZ=          | 29.3128  |
|    |   | Eigenvalues: | -45.5700 | 37.2551      | 114.3580 |
| 6  | C | Isotropic =  | 53.9711  | Anisotropy = | 164.5802 |
|    |   | XX=          | 23.7079  | YX=          | 3.1901   |
|    |   | XY=          | 4.1421   | YY=          | 162.6891 |
|    |   | XZ=          | -6.5571  | YZ=          | -14.9870 |
|    |   |              |          | ZZ=          | -24.4836 |
|    |   | Eigenvalues: | -27.3474 | 25.5695      | 163.6913 |
| 7  | C | Isotropic =  | 160.7803 | Anisotropy = | 19.6771  |
|    |   | XX=          | 172.2021 | YX=          | 3.7933   |
|    |   | XY=          | -2.2834  | YY=          | 154.3892 |
|    |   | XZ=          | -7.8842  | YZ=          | -2.3792  |
|    |   |              |          | ZZ=          | 155.7497 |
|    |   | Eigenvalues: | 151.6421 | 156.8005     | 173.8984 |
| 8  | C | Isotropic =  | 152.7907 | Anisotropy = | 17.9105  |
|    |   | XX=          | 142.9096 | YX=          | -0.5064  |
|    |   | XY=          | -4.3113  | YY=          | 159.8369 |
|    |   | XZ=          | 7.1170   | YZ=          | -10.9760 |
|    |   |              |          | ZZ=          | 155.6257 |
|    |   | Eigenvalues: | 140.8650 | 152.7761     | 164.7311 |
| 9  | C | Isotropic =  | 104.2271 | Anisotropy = | 50.4422  |
|    |   | XX=          | 124.4600 | YX=          | -10.9446 |
|    |   | XY=          | -2.5694  | YY=          | 95.5303  |
|    |   | XZ=          | -19.7634 | YZ=          | 4.7429   |
|    |   |              |          | ZZ=          | 92.6910  |
|    |   | Eigenvalues: | 80.6683  | 94.1577      | 137.8552 |
| 10 | O | Isotropic =  | 180.8129 | Anisotropy = | 109.1538 |
|    |   | XX=          | 157.2904 | YX=          | 2.0502   |
|    |   | XY=          | 24.0345  | YY=          | 249.0785 |
|    |   | XZ=          | 15.2065  | YZ=          | -1.7564  |
|    |   |              |          | ZZ=          | 136.0699 |
|    |   | Eigenvalues: | 131.6331 | 157.2235     | 253.5821 |
| 11 | C | Isotropic =  | 145.9038 | Anisotropy = | 46.4817  |
|    |   | XX=          | 131.3729 | YX=          | 9.0020   |
|    |   | XY=          | 8.5324   | YY=          | 166.8095 |
|    |   | XZ=          | 15.9530  | YZ=          | 19.9250  |
|    |   |              |          | ZZ=          | 139.5290 |
|    |   | Eigenvalues: | 120.5546 | 140.2651     | 176.8916 |
| 12 | C | Isotropic =  | 41.8622  | Anisotropy = | 143.1850 |
|    |   | XX=          | -4.7451  | YX=          | 59.3965  |
|    |   | XY=          | 58.6739  | YY=          | 22.8409  |
|    |   | XZ=          | 26.3899  | YZ=          | 32.3041  |
|    |   |              |          | ZZ=          | 107.4908 |
|    |   | Eigenvalues: | -51.5822 | 39.8500      | 137.3189 |
| 13 | C | Isotropic =  | 26.5364  | Anisotropy = | 178.2762 |
|    |   | XX=          | -40.4106 | YX=          | 63.7277  |
|    |   | XY=          | 53.3749  | YY=          | 4.7847   |
|    |   | XZ=          | 42.8259  | YZ=          | 26.6637  |
|    |   |              |          | ZZ=          | 115.2351 |
|    |   | Eigenvalues: | -81.6321 | 15.8541      | 145.3872 |
| 14 | C | Isotropic =  | 136.5662 | Anisotropy = | 28.7740  |
|    |   | XX=          | 151.7497 | YX=          | 2.9101   |
|    |   | XY=          | 5.4895   | YY=          | 120.6128 |
|    |   | XZ=          | 9.6284   | YZ=          | 9.1600   |
|    |   |              |          | ZZ=          | 137.3360 |
|    |   | Eigenvalues: | 115.2807 | 138.6690     | 155.7488 |
| 15 | C | Isotropic =  | 167.1678 | Anisotropy = | 26.8855  |
|    |   | XX=          | 161.6937 | YX=          | -0.5051  |
|    |   | XY=          | 0.2451   | YY=          | 154.9051 |
|    |   | XZ=          | 1.2640   | YZ=          | 2.0899   |
|    |   |              |          | ZZ=          | 184.9047 |
|    |   | Eigenvalues: | 154.7234 | 161.6886     | 185.0915 |

|              |           |             |           |              |           |
|--------------|-----------|-------------|-----------|--------------|-----------|
| 16           | O         | Isotropic = | 235.9280  | Anisotropy = | 77.7967   |
| XX=          | 227.3034  | YX=         | 5.0922    | ZX=          | 48.3591   |
| XY=          | 7.1671    | YY=         | 273.5969  | ZY=          | -4.9685   |
| XZ=          | 91.5208   | YZ=         | -7.7080   | ZZ=          | 206.8836  |
| Eigenvalues: | 145.8057  | 274.1857    | 287.7924  |              |           |
| 17           | C         | Isotropic = | 132.1216  | Anisotropy = | 72.5819   |
| XX=          | 158.3607  | YX=         | -4.2172   | ZX=          | -36.6787  |
| XY=          | -3.7148   | YY=         | 112.0061  | ZY=          | 2.2403    |
| XZ=          | -32.1621  | YZ=         | 2.0682    | ZZ=          | 125.9980  |
| Eigenvalues: | 104.1327  | 111.7225    | 180.5096  |              |           |
| 18           | C         | Isotropic = | 110.1857  | Anisotropy = | 46.5007   |
| XX=          | 141.0179  | YX=         | 4.4022    | ZX=          | 1.1491    |
| XY=          | 0.6379    | YY=         | 100.4427  | ZY=          | -3.0440   |
| XZ=          | 0.7334    | YZ=         | -1.4923   | ZZ=          | 89.0965   |
| Eigenvalues: | 88.6221   | 100.7488    | 141.1861  |              |           |
| 19           | C         | Isotropic = | 160.6772  | Anisotropy = | 35.8992   |
| XX=          | 159.7117  | YX=         | 4.1313    | ZX=          | -9.4518   |
| XY=          | -1.6231   | YY=         | 142.7229  | ZY=          | 1.9599    |
| XZ=          | -12.7509  | YZ=         | 2.4097    | ZZ=          | 179.5971  |
| Eigenvalues: | 142.3368  | 155.0848    | 184.6100  |              |           |
| 20           | O         | Isotropic = | 235.9657  | Anisotropy = | 66.8435   |
| XX=          | 235.2695  | YX=         | -2.6543   | ZX=          | -27.9421  |
| XY=          | -1.6804   | YY=         | 222.0672  | ZY=          | 11.1308   |
| XZ=          | -41.0947  | YZ=         | 14.7154   | ZZ=          | 250.5603  |
| Eigenvalues: | 204.8982  | 222.4708    | 280.5280  |              |           |
| 21           | C         | Isotropic = | 153.5373  | Anisotropy = | 50.4107   |
| XX=          | 139.9039  | YX=         | -10.8377  | ZX=          | 4.3275    |
| XY=          | -9.8936   | YY=         | 172.0811  | ZY=          | -21.0807  |
| XZ=          | 6.3058    | YZ=         | -20.6290  | ZZ=          | 148.6269  |
| Eigenvalues: | 136.0371  | 137.4304    | 187.1444  |              |           |
| 22           | C         | Isotropic = | -29.4743  | Anisotropy = | 189.9943  |
| XX=          | -88.6835  | YX=         | 48.2534   | ZX=          | 49.2280   |
| XY=          | 51.4804   | YY=         | -2.2485   | ZY=          | 64.2084   |
| XZ=          | 51.8318   | YZ=         | 75.6016   | ZZ=          | 2.5092    |
| Eigenvalues: | -115.8062 | -69.8052    | 97.1886   |              |           |
| 23           | C         | Isotropic = | 126.4057  | Anisotropy = | 30.2007   |
| XX=          | 126.0788  | YX=         | -0.8621   | ZX=          | -0.5111   |
| XY=          | -15.3789  | YY=         | 143.2759  | ZY=          | -4.2967   |
| XZ=          | -3.0420   | YZ=         | 0.4495    | ZZ=          | 109.8624  |
| Eigenvalues: | 109.4129  | 123.2648    | 146.5395  |              |           |
| 24           | C         | Isotropic = | 135.7865  | Anisotropy = | 27.4978   |
| XX=          | 152.8127  | YX=         | -5.1741   | ZX=          | -10.4730  |
| XY=          | 1.0940    | YY=         | 140.1431  | ZY=          | -13.2271  |
| XZ=          | -3.9293   | YZ=         | -9.1304   | ZZ=          | 114.4038  |
| Eigenvalues: | 108.9575  | 144.2836    | 154.1184  |              |           |
| 25           | C         | Isotropic = | 141.0758  | Anisotropy = | 36.3967   |
| XX=          | 147.4146  | YX=         | -19.1582  | ZX=          | -4.8060   |
| XY=          | -20.0413  | YY=         | 137.8634  | ZY=          | 9.8003    |
| XZ=          | -2.7282   | YZ=         | 7.3262    | ZZ=          | 137.9493  |
| Eigenvalues: | 121.1825  | 136.7046    | 165.3403  |              |           |
| 26           | C         | Isotropic = | 154.8035  | Anisotropy = | 31.9979   |
| XX=          | 161.5023  | YX=         | -7.9243   | ZX=          | -15.7745  |
| XY=          | -13.6036  | YY=         | 163.9994  | ZY=          | 3.5176    |
| XZ=          | -13.6736  | YZ=         | -5.7329   | ZZ=          | 138.9089  |
| Eigenvalues: | 130.5864  | 157.6888    | 176.1355  |              |           |
| 27           | C         | Isotropic = | 164.9916  | Anisotropy = | 28.2546   |
| XX=          | 174.2061  | YX=         | -1.7476   | ZX=          | -13.3480  |
| XY=          | -0.9280   | YY=         | 174.8185  | ZY=          | -13.9528  |
| XZ=          | -13.8237  | YZ=         | -15.5121  | ZZ=          | 145.9502  |
| Eigenvalues: | 135.3416  | 175.8052    | 183.8280  |              |           |
| 28           | C         | Isotropic = | 149.0906  | Anisotropy = | 43.9282   |
| XX=          | 164.1515  | YX=         | -19.4963  | ZX=          | 3.9047    |
| XY=          | -15.9370  | YY=         | 150.2206  | ZY=          | -15.1347  |
| XZ=          | -2.3764   | YZ=         | -16.2290  | ZZ=          | 132.8997  |
| Eigenvalues: | 121.7089  | 147.1868    | 178.3761  |              |           |
| 29           | C         | Isotropic = | 164.4845  | Anisotropy = | 36.8112   |
| XX=          | 156.4299  | YX=         | 9.0810    | ZX=          | 13.4117   |
| XY=          | 9.1328    | YY=         | 159.2596  | ZY=          | 7.9292    |
| XZ=          | 14.2442   | YZ=         | 8.5811    | ZZ=          | 177.7640  |
| Eigenvalues: | 147.2273  | 157.2009    | 189.0253  |              |           |
| 30           | C         | Isotropic = | 164.4863  | Anisotropy = | 31.6313   |
| XX=          | 163.0902  | YX=         | 1.3179    | ZX=          | 5.7042    |
| XY=          | 3.0609    | YY=         | 153.0975  | ZY=          | 14.2157   |
| XZ=          | 0.1173    | YZ=         | 17.1993   | ZZ=          | 177.2712  |
| Eigenvalues: | 145.3383  | 162.5468    | 185.5738  |              |           |
| 31           | O         | Isotropic = | -259.0213 | Anisotropy = | 926.2061  |
| XX=          | -373.0574 | YX=         | 31.0336   | ZX=          | 340.3430  |
| XY=          | 61.4104   | YY=         | -156.0949 | ZY=          | 439.6422  |
| XZ=          | 329.2575  | YZ=         | 481.0239  | ZZ=          | -247.9117 |

|              |             |           |              |         |
|--------------|-------------|-----------|--------------|---------|
| Eigenvalues: | -795.8846   | -339.6287 | 358.4494     |         |
| 32 C         | Isotropic = | 163.2036  | Anisotropy = | 26.7606 |
| XX=          | 150.2539    | YX=       | -1.1292      | ZX=     |
| XY=          | -9.1912     | YY=       | 180.0633     | ZY=     |
| XZ=          | -5.3462     | YZ=       | 0.3886       | ZZ=     |
| Eigenvalues: | 145.7882    | 162.7786  | 181.0440     |         |
| 33 H         | Isotropic = | 25.0921   | Anisotropy = | 9.0695  |
| XX=          | 27.9354     | YX=       | 0.0865       | ZX=     |
| XY=          | 0.0520      | YY=       | 20.3678      | ZY=     |
| XZ=          | 3.6702      | YZ=       | 0.3809       | ZZ=     |
| Eigenvalues: | 20.3367     | 23.8012   | 31.1384      |         |
| 34 H         | Isotropic = | 24.9200   | Anisotropy = | 8.7695  |
| XX=          | 30.7223     | YX=       | -0.3365      | ZX=     |
| XY=          | -0.6342     | YY=       | 20.4584      | ZY=     |
| XZ=          | -0.4719     | YZ=       | 0.1958       | ZZ=     |
| Eigenvalues: | 20.4355     | 23.5581   | 30.7664      |         |
| 35 H         | Isotropic = | 29.0697   | Anisotropy = | 9.4265  |
| XX=          | 29.9918     | YX=       | -0.1422      | ZX=     |
| XY=          | 0.4084      | YY=       | 24.5483      | ZY=     |
| XZ=          | 2.8994      | YZ=       | -3.4070      | ZZ=     |
| Eigenvalues: | 22.5657     | 29.2895   | 35.3541      |         |
| 36 H         | Isotropic = | 28.9740   | Anisotropy = | 7.1126  |
| XX=          | 28.9868     | YX=       | -0.0239      | ZX=     |
| XY=          | -1.3372     | YY=       | 29.0185      | ZY=     |
| XZ=          | 1.9607      | YZ=       | 4.0000       | ZZ=     |
| Eigenvalues: | 23.8260     | 29.3802   | 33.7157      |         |
| 37 H         | Isotropic = | 29.9215   | Anisotropy = | 8.5879  |
| XX=          | 30.6008     | YX=       | 2.5143       | ZX=     |
| XY=          | 4.8417      | YY=       | 32.9651      | ZY=     |
| XZ=          | 2.7832      | YZ=       | -2.1718      | ZZ=     |
| Eigenvalues: | 23.5876     | 30.5301   | 35.6467      |         |
| 38 H         | Isotropic = | 30.0557   | Anisotropy = | 7.3685  |
| XX=          | 34.7609     | YX=       | 0.9562       | ZX=     |
| XY=          | 1.0982      | YY=       | 25.1726      | ZY=     |
| XZ=          | -0.3996     | YZ=       | -0.1216      | ZZ=     |
| Eigenvalues: | 25.0485     | 30.1504   | 34.9680      |         |
| 39 H         | Isotropic = | 29.3415   | Anisotropy = | 11.2485 |
| XX=          | 33.2211     | YX=       | 4.7344       | ZX=     |
| XY=          | 4.7815      | YY=       | 30.3802      | ZY=     |
| XZ=          | 2.8347      | YZ=       | -1.6528      | ZZ=     |
| Eigenvalues: | 23.0736     | 28.1104   | 36.8405      |         |
| 40 H         | Isotropic = | 28.5672   | Anisotropy = | 3.5043  |
| XX=          | 26.6054     | YX=       | -1.1759      | ZX=     |
| XY=          | 0.2818      | YY=       | 28.4177      | ZY=     |
| XZ=          | -1.6328     | YZ=       | -1.4582      | ZZ=     |
| Eigenvalues: | 26.3438     | 28.4543   | 30.9034      |         |
| 41 H         | Isotropic = | 29.3484   | Anisotropy = | 3.3579  |
| XX=          | 31.0941     | YX=       | -0.0638      | ZX=     |
| XY=          | -1.3529     | YY=       | 25.5152      | ZY=     |
| XZ=          | -0.5616     | YZ=       | -1.4725      | ZZ=     |
| Eigenvalues: | 25.4144     | 31.0437   | 31.5870      |         |
| 42 H         | Isotropic = | 28.6409   | Anisotropy = | 8.0503  |
| XX=          | 30.0816     | YX=       | 2.7316       | ZX=     |
| XY=          | 3.6397      | YY=       | 31.3742      | ZY=     |
| XZ=          | -1.6032     | YZ=       | 2.0891       | ZZ=     |
| Eigenvalues: | 23.6562     | 28.2588   | 34.0078      |         |
| 43 H         | Isotropic = | 29.9381   | Anisotropy = | 8.9347  |
| XX=          | 33.0958     | YX=       | -0.2588      | ZX=     |
| XY=          | -0.4016     | YY=       | 24.3602      | ZY=     |
| XZ=          | -4.0999     | YZ=       | 0.6184       | ZZ=     |
| Eigenvalues: | 24.3165     | 29.6033   | 35.8946      |         |
| 44 H         | Isotropic = | 29.3475   | Anisotropy = | 6.9015  |
| XX=          | 29.6706     | YX=       | -2.7267      | ZX=     |
| XY=          | -3.5009     | YY=       | 27.5047      | ZY=     |
| XZ=          | 0.6612      | YZ=       | -2.9848      | ZZ=     |
| Eigenvalues: | 23.9733     | 30.1207   | 33.9486      |         |
| 45 H         | Isotropic = | 29.3620   | Anisotropy = | 7.1965  |
| XX=          | 29.7388     | YX=       | 2.4607       | ZX=     |
| XY=          | 3.3687      | YY=       | 28.8230      | ZY=     |
| XZ=          | 0.3028      | YZ=       | 3.4546       | ZZ=     |
| Eigenvalues: | 24.1036     | 29.8228   | 34.1596      |         |
| 46 H         | Isotropic = | 27.9007   | Anisotropy = | 8.9827  |
| XX=          | 33.8241     | YX=       | -0.1434      | ZX=     |
| XY=          | -0.2903     | YY=       | 23.3515      | ZY=     |
| XZ=          | -0.3753     | YZ=       | 0.2447       | ZZ=     |
| Eigenvalues: | 23.3300     | 26.4830   | 33.8892      |         |
| 47 H         | Isotropic = | 28.1673   | Anisotropy = | 8.3097  |
| XX=          | 29.9460     | YX=       | 2.9200       | ZX=     |
| XY=          | 2.7755      | YY=       | 26.3036      | ZY=     |

|              |             |     |         |              |         |         |
|--------------|-------------|-----|---------|--------------|---------|---------|
| XZ=          | -1.5980     | YZ= | -2.6284 | ZZ=          | 28.2525 |         |
| Eigenvalues: | 24.5202     |     | 26.2747 |              | 33.7072 |         |
| 48 H         | Isotropic = |     | 28.1685 | Anisotropy = |         | 8.2453  |
| XX=          | 29.5929     | YX= | -3.6034 | ZX=          | -3.1847 |         |
| XY=          | -3.0958     | YY= | 27.4145 | ZY=          | 2.1713  |         |
| XZ=          | -0.9922     | YZ= | 2.8348  | ZZ=          | 27.4980 |         |
| Eigenvalues: | 24.5782     |     | 26.2619 |              | 33.6653 |         |
| 49 H         | Isotropic = |     | 30.6215 | Anisotropy = |         | 4.4641  |
| XX=          | 26.8908     | YX= | 0.3399  | ZX=          | 0.2243  |         |
| XY=          | -0.5459     | YY= | 33.0950 | ZY=          | -0.2987 |         |
| XZ=          | 0.3756      | YZ= | -1.5407 | ZZ=          | 31.8788 |         |
| Eigenvalues: | 26.8724     |     | 31.3946 |              | 33.5976 |         |
| 50 H         | Isotropic = |     | 30.6872 | Anisotropy = |         | 9.1000  |
| XX=          | 27.7238     | YX= | 1.9195  | ZX=          | 0.6250  |         |
| XY=          | 1.4159      | YY= | 32.1657 | ZY=          | 3.4761  |         |
| XZ=          | 0.9406      | YZ= | 5.0258  | ZZ=          | 32.1721 |         |
| Eigenvalues: | 26.9851     |     | 28.3227 |              | 36.7539 |         |
| 51 H         | Isotropic = |     | 31.0836 | Anisotropy = |         | 7.3600  |
| XX=          | 34.5528     | YX= | -0.1188 | ZX=          | -2.4885 |         |
| XY=          | -0.3221     | YY= | 29.9211 | ZY=          | 1.1112  |         |
| XZ=          | -3.7404     | YZ= | 1.2849  | ZZ=          | 28.7768 |         |
| Eigenvalues: | 27.0550     |     | 30.2055 |              | 35.9903 |         |
| 52 H         | Isotropic = |     | 30.6022 | Anisotropy = |         | 15.6032 |
| XX=          | 31.6264     | YX= | -1.8107 | ZX=          | -7.5571 |         |
| XY=          | -2.6400     | YY= | 28.6277 | ZY=          | 4.1575  |         |
| XZ=          | -6.2015     | YZ= | 7.0272  | ZZ=          | 31.5525 |         |
| Eigenvalues: | 23.0938     |     | 27.7085 |              | 41.0043 |         |
| 53 H         | Isotropic = |     | 30.5933 | Anisotropy = |         | 7.8110  |
| XX=          | 27.6015     | YX= | -0.0339 | ZX=          | -1.1525 |         |
| XY=          | 0.9004      | YY= | 31.0557 | ZY=          | -4.3359 |         |
| XZ=          | -1.9885     | YZ= | -2.1987 | ZZ=          | 33.1228 |         |
| Eigenvalues: | 27.1100     |     | 28.8694 |              | 35.8007 |         |
| 54 H         | Isotropic = |     | 30.6446 | Anisotropy = |         | 7.8248  |
| XX=          | 33.2555     | YX= | -2.2097 | ZX=          | 1.5098  |         |
| XY=          | -3.0407     | YY= | 31.3012 | ZY=          | -2.1328 |         |
| XZ=          | 1.9623      | YZ= | -1.8613 | ZZ=          | 27.3772 |         |
| Eigenvalues: | 26.4723     |     | 29.6004 |              | 35.8612 |         |
| 55 H         | Isotropic = |     | 30.4306 | Anisotropy = |         | 9.2463  |
| XX=          | 26.8858     | YX= | 0.6230  | ZX=          | 0.2254  |         |
| XY=          | 1.6977      | YY= | 36.4259 | ZY=          | 1.1162  |         |
| XZ=          | -0.0361     | YZ= | -0.1179 | ZZ=          | 27.9802 |         |
| Eigenvalues: | 26.7457     |     | 27.9513 |              | 36.5948 |         |
| 56 H         | Isotropic = |     | 29.1227 | Anisotropy = |         | 3.9456  |
| XX=          | 30.2291     | YX= | -1.2863 | ZX=          | -0.5721 |         |
| XY=          | -0.5453     | YY= | 25.5221 | ZY=          | 0.4716  |         |
| XZ=          | -0.3184     | YZ= | -0.6373 | ZZ=          | 31.6171 |         |
| Eigenvalues: | 25.3459     |     | 30.2692 |              | 31.7532 |         |
| 57 H         | Isotropic = |     | 29.0975 | Anisotropy = |         | 10.2621 |
| XX=          | 35.8567     | YX= | 0.1498  | ZX=          | -0.7490 |         |
| XY=          | 0.7989      | YY= | 27.7285 | ZY=          | -1.2108 |         |
| XZ=          | -0.8122     | YZ= | -0.0389 | ZZ=          | 23.7071 |         |
| Eigenvalues: | 23.5721     |     | 27.7815 |              | 35.9389 |         |
| 58 H         | Isotropic = |     | 29.6743 | Anisotropy = |         | 8.3546  |
| XX=          | 27.9560     | YX= | 0.0366  | ZX=          | -3.1257 |         |
| XY=          | -0.7666     | YY= | 27.2455 | ZY=          | -0.6109 |         |
| XZ=          | -3.1824     | YZ= | -1.0609 | ZZ=          | 33.8215 |         |
| Eigenvalues: | 26.1553     |     | 27.6236 |              | 35.2440 |         |
| 59 H         | Isotropic = |     | 30.2567 | Anisotropy = |         | 9.3359  |
| XX=          | 34.9088     | YX= | 2.9484  | ZX=          | -1.2595 |         |
| XY=          | 2.9719      | YY= | 29.9335 | ZY=          | -0.2826 |         |
| XZ=          | -1.4021     | YZ= | -0.7603 | ZZ=          | 25.9279 |         |
| Eigenvalues: | 25.7323     |     | 28.5572 |              | 36.4806 |         |
| 60 H         | Isotropic = |     | 29.9927 | Anisotropy = |         | 11.7345 |
| XX=          | 34.8859     | YX= | -2.8396 | ZX=          | 3.9987  |         |
| XY=          | -3.0794     | YY= | 27.5003 | ZY=          | -2.3906 |         |
| XZ=          | 3.6895      | YZ= | -2.1639 | ZZ=          | 27.5919 |         |
| Eigenvalues: | 25.1971     |     | 26.9652 |              | 37.8157 |         |
| 61 H         | Isotropic = |     | 30.0160 | Anisotropy = |         | 11.7450 |
| XX=          | 29.0340     | YX= | -3.8688 | ZX=          | -3.5025 |         |
| XY=          | -3.7600     | YY= | 32.7305 | ZY=          | 3.9382  |         |
| XZ=          | -3.2601     | YZ= | 3.8364  | ZZ=          | 28.2834 |         |
| Eigenvalues: | 25.2178     |     | 26.9842 |              | 37.8459 |         |
| 62 H         | Isotropic = |     | 29.9286 | Anisotropy = |         | 7.9284  |
| XX=          | 28.1816     | YX= | -1.1109 | ZX=          | 1.0099  |         |
| XY=          | -1.3694     | YY= | 28.0207 | ZY=          | -3.5740 |         |
| XZ=          | 0.3089      | YZ= | -2.8094 | ZZ=          | 33.5835 |         |
| Eigenvalues: | 26.1760     |     | 28.3956 |              | 35.2142 |         |
| 63 H         | Isotropic = |     | 30.2649 | Anisotropy = |         | 8.6030  |
| XX=          | 29.1349     | YX= | 0.8915  | ZX=          | -0.2503 |         |

|              |             |         |              |     |         |        |
|--------------|-------------|---------|--------------|-----|---------|--------|
| XY=          | 0.8762      | YY=     | 35.7102      | ZY= | -1.0363 |        |
| XZ=          | -0.2644     | YZ=     | -1.5576      | ZZ= | 25.9495 |        |
| Eigenvalues: | 25.7741     |         | 29.0204      |     | 36.0002 |        |
| 64 H         | Isotropic = | 30.7717 | Anisotropy = |     |         | 6.1804 |
| XX=          | 30.1338     | YX=     | -2.5932      | ZX= | 2.5540  |        |
| XY=          | -2.8973     | YY=     | 30.1641      | ZY= | 0.1125  |        |
| XZ=          | 3.5132      | YZ=     | -0.0515      | ZZ= | 32.0173 |        |
| Eigenvalues: | 26.4376     |         | 30.9857      |     | 34.8920 |        |
| 65 H         | Isotropic = | 30.7624 | Anisotropy = |     |         | 8.3652 |
| XX=          | 31.1937     | YX=     | -0.4202      | ZX= | -0.9290 |        |
| XY=          | -1.0960     | YY=     | 27.6034      | ZY= | 3.9276  |        |
| XZ=          | -2.0613     | YZ=     | 4.7586       | ZZ= | 33.4900 |        |
| Eigenvalues: | 25.3000     |         | 30.6479      |     | 36.3392 |        |
| 66 H         | Isotropic = | 31.3404 | Anisotropy = |     |         | 8.9159 |
| XX=          | 32.5547     | YX=     | 3.3060       | ZX= | 0.7522  |        |
| XY=          | 3.1504      | YY=     | 33.3125      | ZY= | 2.1122  |        |
| XZ=          | 1.8800      | YZ=     | 3.9648       | ZZ= | 28.1540 |        |
| Eigenvalues: | 26.7416     |         | 29.9953      |     | 37.2843 |        |
| 67 H         | Isotropic = | 30.8553 | Anisotropy = |     |         | 9.0288 |
| XX=          | 31.7562     | YX=     | 3.2403       | ZX= | 1.5146  |        |
| XY=          | 4.0813      | YY=     | 33.1155      | ZY= | 1.6194  |        |
| XZ=          | 2.2391      | YZ=     | 1.9204       | ZZ= | 27.6941 |        |
| Eigenvalues: | 26.9291     |         | 28.7622      |     | 36.8745 |        |
| 68 H         | Isotropic = | 30.5547 | Anisotropy = |     |         | 6.7514 |
| XX=          | 31.8044     | YX=     | -2.1174      | ZX= | -0.3171 |        |
| XY=          | -1.3480     | YY=     | 29.0672      | ZY= | 4.5061  |        |
| XZ=          | -1.8769     | YZ=     | 3.2055       | ZZ= | 30.7925 |        |
| Eigenvalues: | 25.8970     |         | 30.7115      |     | 35.0556 |        |
| 69 H         | Isotropic = | 30.6383 | Anisotropy = |     |         | 8.1431 |
| XX=          | 29.6631     | YX=     | -2.0980      | ZX= | 4.7141  |        |
| XY=          | -0.8742     | YY=     | 29.5462      | ZY= | 0.3118  |        |
| XZ=          | 4.2544      | YZ=     | -0.5696      | ZZ= | 32.7056 |        |
| Eigenvalues: | 26.0696     |         | 29.7783      |     | 36.0670 |        |
| 70 H         | Isotropic = | 30.8037 | Anisotropy = |     |         | 8.9077 |
| XX=          | 34.1177     | YX=     | -2.4594      | ZX= | -1.8723 |        |
| XY=          | -3.3430     | YY=     | 30.7483      | ZY= | 2.7813  |        |
| XZ=          | -1.5673     | YZ=     | 2.9014       | ZZ= | 27.5453 |        |
| Eigenvalues: | 25.8851     |         | 29.7839      |     | 36.7422 |        |
| 71 H         | Isotropic = | 30.6558 | Anisotropy = |     |         | 6.9730 |
| XX=          | 30.2170     | YX=     | 0.2524       | ZX= | -0.0258 |        |
| XY=          | -1.6069     | YY=     | 31.4642      | ZY= | -5.4559 |        |
| XZ=          | 1.0756      | YZ=     | -3.0335      | ZZ= | 30.2863 |        |
| Eigenvalues: | 26.5892     |         | 30.0738      |     | 35.3045 |        |
| 72 H         | Isotropic = | 30.0970 | Anisotropy = |     |         | 5.5533 |
| XX=          | 32.0594     | YX=     | 1.9564       | ZX= | 2.2723  |        |
| XY=          | 0.0052      | YY=     | 32.4676      | ZY= | 0.7429  |        |
| XZ=          | 2.8169      | YZ=     | 0.0535       | ZZ= | 25.7639 |        |
| Eigenvalues: | 24.8637     |         | 31.6280      |     | 33.7992 |        |



**Chemical Shielding tensors (GIAO MPW1PW91/6-311+G(2d,p) iefpcm = DMSO)  
3S\*,7S\*,11R\*-1b**

**Conf 2 (44 %)**

|              |          |             |          |              |          |
|--------------|----------|-------------|----------|--------------|----------|
| 1            | C        | Isotropic = | 72.7942  | Anisotropy = | 131.1507 |
| XX=          | 77.6215  | YX=         | 51.2263  | ZX=          | -40.3634 |
| XY=          | 33.3169  | YY=         | 12.4616  | ZY=          | -19.8926 |
| XZ=          | -44.7398 | YZ=         | -7.6233  | ZZ=          | 128.2995 |
| Eigenvalues: | -8.6771  | 66.8317     | 160.2280 |              |          |
| 2            | C        | Isotropic = | 27.4292  | Anisotropy = | 128.4293 |
| XX=          | -4.0519  | YX=         | 12.9298  | ZX=          | -74.1504 |
| XY=          | 11.1405  | YY=         | 24.3071  | ZY=          | -16.8195 |
| XZ=          | -70.8418 | YZ=         | -14.6167 | ZZ=          | 62.0324  |
| Eigenvalues: | -50.7168 | 19.9557     | 113.0487 |              |          |
| 3            | C        | Isotropic = | 66.8401  | Anisotropy = | 127.1642 |
| XX=          | 75.7463  | YX=         | -13.4212 | ZX=          | -52.6655 |
| XY=          | -8.1558  | YY=         | 15.3237  | ZY=          | -41.1517 |
| XZ=          | -45.8709 | YZ=         | -46.9084 | ZZ=          | 109.4504 |
| Eigenvalues: | -12.5154 | 61.4196     | 151.6163 |              |          |
| 4            | C        | Isotropic = | 60.2345  | Anisotropy = | 170.9127 |
| XX=          | 66.0015  | YX=         | 40.4901  | ZX=          | -61.5335 |
| XY=          | 31.1655  | YY=         | -3.8475  | ZY=          | -21.1999 |
| XZ=          | -77.6534 | YZ=         | -17.6370 | ZZ=          | 118.5495 |
| Eigenvalues: | -19.9120 | 26.4392     | 174.1763 |              |          |
| 5            | C        | Isotropic = | 35.6034  | Anisotropy = | 120.2680 |
| XX=          | 1.5728   | YX=         | 18.9536  | ZX=          | -68.2089 |
| XY=          | 10.2570  | YY=         | 42.6410  | ZY=          | -14.0272 |
| XZ=          | -74.2408 | YZ=         | -17.7511 | ZZ=          | 62.5966  |
| Eigenvalues: | -45.5397 | 36.5679     | 115.7821 |              |          |
| 6            | C        | Isotropic = | 54.3634  | Anisotropy = | 164.2358 |
| XX=          | 59.6327  | YX=         | -1.5742  | ZX=          | -69.7538 |
| XY=          | 6.7026   | YY=         | -2.4198  | ZY=          | -45.4516 |
| XZ=          | -66.2480 | YZ=         | -46.3198 | ZZ=          | 105.8773 |
| Eigenvalues: | -26.8008 | 26.0371     | 163.8539 |              |          |
| 7            | C        | Isotropic = | 161.1648 | Anisotropy = | 18.9875  |
| XX=          | 163.9655 | YX=         | -4.6179  | ZX=          | 7.5928   |
| XY=          | -7.0025  | YY=         | 164.6872 | ZY=          | -9.2116  |
| XZ=          | 0.5765   | YZ=         | -5.8471  | ZZ=          | 154.8416 |
| Eigenvalues: | 150.7033 | 158.9679    | 173.8231 |              |          |
| 8            | C        | Isotropic = | 148.6942 | Anisotropy = | 28.6410  |
| XX=          | 152.2971 | YX=         | 10.0266  | ZX=          | -6.3441  |
| XY=          | 19.2709  | YY=         | 152.8724 | ZY=          | -1.3439  |
| XZ=          | -8.8559  | YZ=         | 5.7934   | ZZ=          | 140.9132 |
| Eigenvalues: | 132.1222 | 146.1722    | 167.7882 |              |          |
| 9            | C        | Isotropic = | 105.3565 | Anisotropy = | 51.0655  |
| XX=          | 107.5466 | YX=         | -28.5356 | ZX=          | -9.3972  |
| XY=          | -27.3104 | YY=         | 114.7730 | ZY=          | -1.5687  |
| XZ=          | -1.6078  | YZ=         | -2.9055  | ZZ=          | 93.7499  |
| Eigenvalues: | 80.5990  | 96.0703     | 139.4001 |              |          |
| 10           | O        | Isotropic = | 185.0924 | Anisotropy = | 117.7883 |
| XX=          | 173.0957 | YX=         | -3.0827  | ZX=          | -53.2036 |
| XY=          | 18.6420  | YY=         | 131.0070 | ZY=          | -17.5811 |
| XZ=          | -9.6759  | YZ=         | -5.3741  | ZZ=          | 251.1746 |
| Eigenvalues: | 129.2759 | 162.3834    | 263.6180 |              |          |
| 11           | C        | Isotropic = | 144.0494 | Anisotropy = | 47.4788  |
| XX=          | 124.1367 | YX=         | -13.9194 | ZX=          | -5.6232  |
| XY=          | -18.9046 | YY=         | 148.0494 | ZY=          | 10.2581  |
| XZ=          | -15.4306 | YZ=         | 17.9595  | ZZ=          | 159.9620 |
| Eigenvalues: | 115.5471 | 140.8992    | 175.7019 |              |          |
| 12           | C        | Isotropic = | 44.6440  | Anisotropy = | 134.9740 |
| XX=          | 41.4976  | YX=         | -21.6911 | ZX=          | -5.8656  |
| XY=          | -20.8730 | YY=         | -37.9608 | ZY=          | 28.3127  |
| XZ=          | 1.2285   | YZ=         | 23.5442  | ZZ=          | 130.3952 |
| Eigenvalues: | -46.7292 | 46.0346     | 134.6267 |              |          |
| 13           | C        | Isotropic = | 22.6254  | Anisotropy = | 184.4614 |
| XX=          | -1.9670  | YX=         | -38.1037 | ZX=          | 0.3852   |
| XY=          | -21.8612 | YY=         | -73.5927 | ZY=          | 26.5015  |
| XZ=          | 9.3145   | YZ=         | 16.8042  | ZZ=          | 143.4358 |
| Eigenvalues: | -86.5927 | 8.8692      | 145.5996 |              |          |
| 14           | C        | Isotropic = | 144.4821 | Anisotropy = | 25.0849  |
| XX=          | 142.9237 | YX=         | 7.0974   | ZX=          | -9.2097  |
| XY=          | 7.9927   | YY=         | 146.6409 | ZY=          | 3.9892   |
| XZ=          | -21.4298 | YZ=         | -5.6780  | ZZ=          | 143.8816 |
| Eigenvalues: | 126.8301 | 145.4108    | 161.2053 |              |          |
| 15           | C        | Isotropic = | 166.7238 | Anisotropy = | 26.6212  |
| XX=          | 162.7020 | YX=         | 2.2627   | ZX=          | 4.2859   |
| XY=          | 3.9720   | YY=         | 178.3798 | ZY=          | 11.6054  |
| XZ=          | 2.7302   | YZ=         | 11.0619  | ZZ=          | 159.0896 |
| Eigenvalues: | 153.4450 | 162.2551    | 184.4713 |              |          |

|              |           |             |           |              |           |
|--------------|-----------|-------------|-----------|--------------|-----------|
| 16           | O         | Isotropic = | 235.5560  | Anisotropy = | 77.5734   |
| XX=          | 261.9081  | YX=         | 31.6169   | ZX=          | 0.4551    |
| XY=          | 67.8029   | YY=         | 166.1133  | ZY=          | 14.5559   |
| XZ=          | 9.6404    | YZ=         | -7.4463   | ZZ=          | 278.6467  |
| Eigenvalues: | 144.9674  | 274.4291    | 287.2716  |              |           |
| 17           | C         | Isotropic = | 132.0812  | Anisotropy = | 72.4993   |
| XX=          | 133.3046  | YX=         | -36.4859  | ZX=          | 3.7023    |
| XY=          | -32.8627  | YY=         | 151.7952  | ZY=          | -10.2552  |
| XZ=          | 4.8797    | YZ=         | -12.6407  | ZZ=          | 111.1437  |
| Eigenvalues: | 104.1757  | 111.6538    | 180.4141  |              |           |
| 18           | C         | Isotropic = | 108.9294  | Anisotropy = | 52.8958   |
| XX=          | 99.5641   | YX=         | -20.3030  | ZX=          | 4.9463    |
| XY=          | -18.9633  | YY=         | 130.6144  | ZY=          | -15.1750  |
| XZ=          | 2.9632    | YZ=         | -11.9017  | ZZ=          | 96.6095   |
| Eigenvalues: | 88.7295   | 93.8653     | 144.1933  |              |           |
| 19           | C         | Isotropic = | 156.4194  | Anisotropy = | 37.7901   |
| XX=          | 167.0124  | YX=         | 15.0782   | ZX=          | -12.0283  |
| XY=          | 11.3534   | YY=         | 150.7279  | ZY=          | -5.6270   |
| XZ=          | -15.3073  | YZ=         | -5.8160   | ZZ=          | 151.5178  |
| Eigenvalues: | 142.2463  | 145.3990    | 181.6128  |              |           |
| 20           | O         | Isotropic = | 222.1789  | Anisotropy = | 70.6573   |
| XX=          | 218.5231  | YX=         | -23.4289  | ZX=          | 27.4043   |
| XY=          | -16.9697  | YY=         | 234.1060  | ZY=          | -17.0779  |
| XZ=          | 27.2778   | YZ=         | -27.5919  | ZZ=          | 213.9077  |
| Eigenvalues: | 188.5142  | 208.7388    | 269.2838  |              |           |
| 21           | C         | Isotropic = | 159.5263  | Anisotropy = | 35.7365   |
| XX=          | 170.9492  | YX=         | 9.4492    | ZX=          | 10.6715   |
| XY=          | 12.4224   | YY=         | 148.0460  | ZY=          | 4.2258    |
| XZ=          | 13.7707   | YZ=         | 8.9100    | ZZ=          | 159.5837  |
| Eigenvalues: | 143.4275  | 151.8008    | 183.3506  |              |           |
| 22           | C         | Isotropic = | -25.0965  | Anisotropy = | 182.8467  |
| XX=          | -65.1357  | YX=         | -36.3623  | ZX=          | -31.9013  |
| XY=          | -40.6826  | YY=         | -75.3649  | ZY=          | 50.3197   |
| XZ=          | -40.5160  | YZ=         | 56.2208   | ZZ=          | 65.2109   |
| Eigenvalues: | -111.1691 | -60.9217    | 96.8013   |              |           |
| 23           | C         | Isotropic = | 127.1178  | Anisotropy = | 30.0976   |
| XX=          | 124.8584  | YX=         | -9.3907   | ZX=          | -5.6744   |
| XY=          | 0.3057    | YY=         | 145.9815  | ZY=          | -4.1284   |
| XZ=          | -6.5901   | YZ=         | 7.8593    | ZZ=          | 110.5135  |
| Eigenvalues: | 108.2485  | 125.9220    | 147.1828  |              |           |
| 24           | C         | Isotropic = | 136.0694  | Anisotropy = | 27.7675   |
| XX=          | 150.0522  | YX=         | 5.2534    | ZX=          | -4.0896   |
| XY=          | 0.7358    | YY=         | 146.1510  | ZY=          | -5.0553   |
| XZ=          | -13.0891  | YZ=         | -9.6275   | ZZ=          | 112.0050  |
| Eigenvalues: | 108.9879  | 144.6393    | 154.5810  |              |           |
| 25           | C         | Isotropic = | 142.8683  | Anisotropy = | 35.5613   |
| XX=          | 128.6990  | YX=         | 12.1889   | ZX=          | 3.9841    |
| XY=          | 16.3204   | YY=         | 159.9067  | ZY=          | 5.8610    |
| XZ=          | 3.3833    | YZ=         | 3.0628    | ZZ=          | 139.9991  |
| Eigenvalues: | 122.9652  | 139.0638    | 166.5758  |              |           |
| 26           | C         | Isotropic = | 154.7389  | Anisotropy = | 31.7405   |
| XX=          | 160.2544  | YX=         | 1.2860    | ZX=          | -1.7606   |
| XY=          | 10.9027   | YY=         | 172.9302  | ZY=          | 7.5284    |
| XZ=          | 1.4337    | YZ=         | 2.9319    | ZZ=          | 131.0320  |
| Eigenvalues: | 130.3607  | 157.9567    | 175.8992  |              |           |
| 27           | C         | Isotropic = | 164.6824  | Anisotropy = | 29.0601   |
| XX=          | 183.4835  | YX=         | -1.9087   | ZX=          | -3.7076   |
| XY=          | -2.0281   | YY=         | 175.6541  | ZY=          | -3.0825   |
| XZ=          | -2.6602   | YZ=         | -4.5053   | ZZ=          | 134.9095  |
| Eigenvalues: | 134.3304  | 175.6610    | 184.0558  |              |           |
| 28           | C         | Isotropic = | 149.0429  | Anisotropy = | 43.8007   |
| XX=          | 147.8529  | YX=         | 6.6902    | ZX=          | -2.5242   |
| XY=          | 2.3269    | YY=         | 171.3144  | ZY=          | -17.9837  |
| XZ=          | 2.9212    | YZ=         | -17.5583  | ZZ=          | 127.9615  |
| Eigenvalues: | 121.4965  | 147.3890    | 178.2434  |              |           |
| 29           | C         | Isotropic = | 164.0501  | Anisotropy = | 35.4760   |
| XX=          | 155.8476  | YX=         | -3.2322   | ZX=          | -1.0970   |
| XY=          | -4.4241   | YY=         | 148.7699  | ZY=          | 1.3921    |
| XZ=          | -2.7319   | YZ=         | 1.0046    | ZZ=          | 187.5326  |
| Eigenvalues: | 147.0928  | 157.3567    | 187.7007  |              |           |
| 30           | C         | Isotropic = | 165.1162  | Anisotropy = | 31.6223   |
| XX=          | 156.9263  | YX=         | 12.6107   | ZX=          | -0.3596   |
| XY=          | 7.5580    | YY=         | 154.7911  | ZY=          | 5.9520    |
| XZ=          | 2.8436    | YZ=         | 9.9512    | ZZ=          | 183.6313  |
| Eigenvalues: | 145.0158  | 164.1351    | 186.1977  |              |           |
| 31           | O         | Isotropic = | -281.7290 | Anisotropy = | 965.2505  |
| XX=          | -747.5499 | YX=         | -10.7819  | ZX=          | -307.4803 |
| XY=          | -52.1795  | YY=         | -281.0885 | ZY=          | 219.6120  |
| XZ=          | -327.3955 | YZ=         | 236.3395  | ZZ=          | 183.4514  |

|              |             |           |              |         |
|--------------|-------------|-----------|--------------|---------|
| Eigenvalues: | -848.1268   | -358.8316 | 361.7714     |         |
| 32 C         | Isotropic = | 159.7828  | Anisotropy = | 36.6667 |
| XX=          | 159.0104    | YX=       | 1.3648       | ZX=     |
| XY=          | -0.7359     | YY=       | 146.2560     | ZY=     |
| XZ=          | 16.8808     | YZ=       | 3.6434       | ZZ=     |
| Eigenvalues: | 145.2087    | 149.9125  | 184.2273     |         |
| 33 H         | Isotropic = | 25.0770   | Anisotropy = | 9.4262  |
| XX=          | 27.5645     | YX=       | 1.4904       | ZX=     |
| XY=          | 1.6060      | YY=       | 24.1079      | ZY=     |
| XZ=          | 4.3606      | YZ=       | 2.3579       | ZZ=     |
| Eigenvalues: | 20.2975     | 23.5723   | 31.3611      |         |
| 34 H         | Isotropic = | 24.8728   | Anisotropy = | 8.3597  |
| XX=          | 27.8837     | YX=       | -2.1951      | ZX=     |
| XY=          | -2.4415     | YY=       | 24.7711      | ZY=     |
| XZ=          | 3.1200      | YZ=       | -0.7555      | ZZ=     |
| Eigenvalues: | 20.3836     | 23.7889   | 30.4459      |         |
| 35 H         | Isotropic = | 28.7623   | Anisotropy = | 6.1171  |
| XX=          | 29.8444     | YX=       | -1.7404      | ZX=     |
| XY=          | -0.2263     | YY=       | 27.2404      | ZY=     |
| XZ=          | -0.8809     | YZ=       | 4.6804       | ZZ=     |
| Eigenvalues: | 23.9174     | 29.5292   | 32.8404      |         |
| 36 H         | Isotropic = | 29.0572   | Anisotropy = | 10.4189 |
| XX=          | 30.6312     | YX=       | 4.5270       | ZX=     |
| XY=          | 4.3659      | YY=       | 32.2661      | ZY=     |
| XZ=          | 2.2528      | YZ=       | -2.3085      | ZZ=     |
| Eigenvalues: | 22.6794     | 28.4890   | 36.0031      |         |
| 37 H         | Isotropic = | 29.9273   | Anisotropy = | 6.7843  |
| XX=          | 29.8895     | YX=       | -1.6331      | ZX=     |
| XY=          | -1.7173     | YY=       | 33.4418      | ZY=     |
| XZ=          | 1.1105      | YZ=       | -1.0740      | ZZ=     |
| Eigenvalues: | 25.9602     | 29.3715   | 34.4502      |         |
| 38 H         | Isotropic = | 29.9670   | Anisotropy = | 8.0930  |
| XX=          | 29.3410     | YX=       | 3.6385       | ZX=     |
| XY=          | 2.7301      | YY=       | 27.7163      | ZY=     |
| XZ=          | -0.8000     | YZ=       | -2.5428      | ZZ=     |
| Eigenvalues: | 25.0787     | 29.4599   | 35.3623      |         |
| 39 H         | Isotropic = | 29.4433   | Anisotropy = | 7.5022  |
| XX=          | 31.9210     | YX=       | -2.5885      | ZX=     |
| XY=          | -2.0048     | YY=       | 28.0383      | ZY=     |
| XZ=          | -4.2819     | YZ=       | -2.2195      | ZZ=     |
| Eigenvalues: | 24.7474     | 29.1378   | 34.4448      |         |
| 40 H         | Isotropic = | 28.5886   | Anisotropy = | 4.2578  |
| XX=          | 28.7463     | YX=       | 0.8291       | ZX=     |
| XY=          | -0.4499     | YY=       | 28.8798      | ZY=     |
| XZ=          | 3.9207      | YZ=       | 0.4848       | ZZ=     |
| Eigenvalues: | 25.5849     | 28.7537   | 31.4271      |         |
| 41 H         | Isotropic = | 29.3395   | Anisotropy = | 5.8429  |
| XX=          | 32.4718     | YX=       | 0.9328       | ZX=     |
| XY=          | 3.5077      | YY=       | 26.6278      | ZY=     |
| XZ=          | -0.5671     | YZ=       | 0.6229       | ZZ=     |
| Eigenvalues: | 25.8456     | 28.9382   | 33.2348      |         |
| 42 H         | Isotropic = | 29.0406   | Anisotropy = | 11.2642 |
| XX=          | 33.4826     | YX=       | -1.7657      | ZX=     |
| XY=          | -3.0397     | YY=       | 29.9519      | ZY=     |
| XZ=          | -3.7368     | YZ=       | 3.1767       | ZZ=     |
| Eigenvalues: | 21.7840     | 28.7878   | 36.5501      |         |
| 43 H         | Isotropic = | 29.8872   | Anisotropy = | 8.7889  |
| XX=          | 30.9896     | YX=       | -2.8572      | ZX=     |
| XY=          | -4.3057     | YY=       | 33.0483      | ZY=     |
| XZ=          | 1.4296      | YZ=       | 2.1374       | ZZ=     |
| Eigenvalues: | 24.3289     | 29.5863   | 35.7465      |         |
| 44 H         | Isotropic = | 29.2400   | Anisotropy = | 6.5060  |
| XX=          | 26.8918     | YX=       | -2.3807      | ZX=     |
| XY=          | -1.2686     | YY=       | 28.0588      | ZY=     |
| XZ=          | 1.6996      | YZ=       | 2.2097       | ZZ=     |
| Eigenvalues: | 24.9825     | 29.1601   | 33.5773      |         |
| 45 H         | Isotropic = | 29.3429   | Anisotropy = | 9.8827  |
| XX=          | 34.9924     | YX=       | 1.8195       | ZX=     |
| XY=          | 2.1598      | YY=       | 30.0422      | ZY=     |
| XZ=          | -2.2150     | YZ=       | -1.0467      | ZZ=     |
| Eigenvalues: | 22.7510     | 29.3464   | 35.9314      |         |
| 46 H         | Isotropic = | 27.8854   | Anisotropy = | 9.0012  |
| XX=          | 30.9316     | YX=       | -1.1198      | ZX=     |
| XY=          | -2.8514     | YY=       | 26.8106      | ZY=     |
| XZ=          | 4.0465      | YZ=       | 0.2329       | ZZ=     |
| Eigenvalues: | 23.3130     | 26.4569   | 33.8861      |         |
| 47 H         | Isotropic = | 28.1490   | Anisotropy = | 8.3672  |
| XX=          | 30.5975     | YX=       | -4.1375      | ZX=     |
| XY=          | -2.8144     | YY=       | 28.0247      | ZY=     |

|              |             |         |              |     |         |         |
|--------------|-------------|---------|--------------|-----|---------|---------|
| XZ=          | -1.1275     | YZ=     | 1.1968       | ZZ= | 25.8246 |         |
| Eigenvalues: | 24.4346     |         | 26.2852      |     | 33.7271 |         |
| 48 H         | Isotropic = | 28.1492 | Anisotropy = |     |         | 7.9314  |
| XX=          | 26.1978     | YX=     | -2.0381      | ZX= | 1.4428  |         |
| XY=          | 0.1701      | YY=     | 30.9888      | ZY= | -3.1836 |         |
| XZ=          | 1.9060      | YZ=     | -3.7253      | ZZ= | 27.2611 |         |
| Eigenvalues: | 24.5203     |         | 26.4905      |     | 33.4368 |         |
| 49 H         | Isotropic = | 30.6626 | Anisotropy = |     |         | 6.9621  |
| XX=          | 34.7350     | YX=     | 1.3026       | ZX= | 1.9794  |         |
| XY=          | 1.5954      | YY=     | 29.7935      | ZY= | 1.9534  |         |
| XZ=          | -0.8492     | YZ=     | 2.4505       | ZZ= | 27.4591 |         |
| Eigenvalues: | 26.1257     |         | 30.5580      |     | 35.3040 |         |
| 50 H         | Isotropic = | 30.8064 | Anisotropy = |     |         | 9.0172  |
| XX=          | 31.2935     | YX=     | -2.0110      | ZX= | -3.9604 |         |
| XY=          | -0.9760     | YY=     | 29.4762      | ZY= | 2.0838  |         |
| XZ=          | -4.1277     | YZ=     | 3.5573       | ZZ= | 31.6494 |         |
| Eigenvalues: | 26.9084     |         | 28.6929      |     | 36.8178 |         |
| 51 H         | Isotropic = | 31.0062 | Anisotropy = |     |         | 6.9085  |
| XX=          | 28.4715     | YX=     | -1.0333      | ZX= | -2.5326 |         |
| XY=          | -1.2504     | YY=     | 34.7766      | ZY= | -2.3047 |         |
| XZ=          | -2.3120     | YZ=     | -2.0901      | ZZ= | 29.7704 |         |
| Eigenvalues: | 26.0248     |         | 31.3819      |     | 35.6119 |         |
| 52 H         | Isotropic = | 31.4140 | Anisotropy = |     |         | 15.1494 |
| XX=          | 35.4494     | YX=     | -2.2345      | ZX= | 7.7156  |         |
| XY=          | -3.1601     | YY=     | 29.6563      | ZY= | -2.6882 |         |
| XZ=          | 7.6327      | YZ=     | -1.1454      | ZZ= | 29.1362 |         |
| Eigenvalues: | 23.9931     |         | 28.7352      |     | 41.5136 |         |
| 53 H         | Isotropic = | 30.7043 | Anisotropy = |     |         | 7.0685  |
| XX=          | 33.8789     | YX=     | 2.4317       | ZX= | -2.4253 |         |
| XY=          | 2.6187      | YY=     | 30.9202      | ZY= | 0.5744  |         |
| XZ=          | -1.0744     | YZ=     | 2.2484       | ZZ= | 27.3137 |         |
| Eigenvalues: | 25.9846     |         | 30.7117      |     | 35.4167 |         |
| 54 H         | Isotropic = | 30.9097 | Anisotropy = |     |         | 4.7810  |
| XX=          | 31.1385     | YX=     | -3.4618      | ZX= | 1.4984  |         |
| XY=          | -2.3322     | YY=     | 30.9622      | ZY= | 0.2751  |         |
| XZ=          | 1.5277      | YZ=     | 0.8957       | ZZ= | 30.6284 |         |
| Eigenvalues: | 27.4526     |         | 31.1795      |     | 34.0970 |         |
| 55 H         | Isotropic = | 30.6594 | Anisotropy = |     |         | 9.0815  |
| XX=          | 28.9840     | YX=     | 0.0598       | ZX= | -0.0858 |         |
| XY=          | -0.2666     | YY=     | 30.1886      | ZY= | 4.4957  |         |
| XZ=          | -1.2155     | YZ=     | 5.5145       | ZZ= | 32.8056 |         |
| Eigenvalues: | 26.2864     |         | 28.9781      |     | 36.7137 |         |
| 56 H         | Isotropic = | 29.5795 | Anisotropy = |     |         | 4.7436  |
| XX=          | 31.1393     | YX=     | 2.6662       | ZX= | 1.5988  |         |
| XY=          | 2.6352      | YY=     | 28.0090      | ZY= | -0.2764 |         |
| XZ=          | 0.8769      | YZ=     | -2.0686      | ZZ= | 29.5902 |         |
| Eigenvalues: | 25.7887     |         | 30.2079      |     | 32.7419 |         |
| 57 H         | Isotropic = | 28.4696 | Anisotropy = |     |         | 13.1744 |
| XX=          | 34.5448     | YX=     | 3.4485       | ZX= | -2.9643 |         |
| XY=          | 2.7783      | YY=     | 29.1062      | ZY= | -0.8479 |         |
| XZ=          | -5.8661     | YZ=     | -1.3084      | ZZ= | 21.7579 |         |
| Eigenvalues: | 20.3802     |         | 27.7761      |     | 37.2525 |         |
| 58 H         | Isotropic = | 29.6259 | Anisotropy = |     |         | 8.4967  |
| XX=          | 31.9999     | YX=     | 0.4115       | ZX= | 4.2635  |         |
| XY=          | 1.3922      | YY=     | 27.7193      | ZY= | 0.7142  |         |
| XZ=          | 4.3533      | YZ=     | 0.7160       | ZZ= | 29.1585 |         |
| Eigenvalues: | 26.0409     |         | 27.5464      |     | 35.2904 |         |
| 59 H         | Isotropic = | 30.3733 | Anisotropy = |     |         | 9.6424  |
| XX=          | 34.9264     | YX=     | 1.3281       | ZX= | -3.9412 |         |
| XY=          | 1.4415      | YY=     | 28.7732      | ZY= | -0.2264 |         |
| XZ=          | -3.7438     | YZ=     | -0.5974      | ZZ= | 27.4201 |         |
| Eigenvalues: | 25.7931     |         | 28.5252      |     | 36.8015 |         |
| 60 H         | Isotropic = | 30.0388 | Anisotropy = |     |         | 11.6892 |
| XX=          | 27.7859     | YX=     | 1.8226       | ZX= | -1.7979 |         |
| XY=          | 1.8096      | YY=     | 32.7206      | ZY= | -5.9700 |         |
| XZ=          | -1.8373     | YZ=     | -5.6608      | ZZ= | 29.6098 |         |
| Eigenvalues: | 25.0931     |         | 27.1916      |     | 37.8315 |         |
| 61 H         | Isotropic = | 29.9993 | Anisotropy = |     |         | 11.7055 |
| XX=          | 27.8257     | YX=     | 2.3271       | ZX= | 1.0875  |         |
| XY=          | 2.3484      | YY=     | 35.0172      | ZY= | 4.8341  |         |
| XZ=          | 0.8133      | YZ=     | 4.4422       | ZZ= | 27.1550 |         |
| Eigenvalues: | 24.9999     |         | 27.1951      |     | 37.8029 |         |
| 62 H         | Isotropic = | 30.0353 | Anisotropy = |     |         | 7.3207  |
| XX=          | 30.6320     | YX=     | -0.5627      | ZX= | 3.3480  |         |
| XY=          | -0.9697     | YY=     | 29.1329      | ZY= | -3.2625 |         |
| XZ=          | 3.0839      | YZ=     | -2.5720      | ZZ= | 30.3412 |         |
| Eigenvalues: | 26.1094     |         | 29.0809      |     | 34.9158 |         |
| 63 H         | Isotropic = | 30.2288 | Anisotropy = |     |         | 8.2887  |
| XX=          | 32.0393     | YX=     | -2.9816      | ZX= | -2.3747 |         |

|              |             |         |              |     |         |        |
|--------------|-------------|---------|--------------|-----|---------|--------|
| XY=          | -2.8267     | YY=     | 32.4872      | ZY= | 1.3036  |        |
| XZ=          | -2.4003     | YZ=     | 0.6346       | ZZ= | 26.1599 |        |
| Eigenvalues: | 25.3120     |         | 29.6198      |     | 35.7546 |        |
| 64 H         | Isotropic = | 30.6828 | Anisotropy = |     |         | 5.6381 |
| XX=          | 27.1381     | YX=     | -0.7196      | ZX= | 1.3995  |        |
| XY=          | -0.1876     | YY=     | 32.2837      | ZY= | -1.5698 |        |
| XZ=          | 0.6093      | YZ=     | -2.0849      | ZZ= | 32.6265 |        |
| Eigenvalues: | 26.9566     |         | 30.6502      |     | 34.4415 |        |
| 65 H         | Isotropic = | 30.7680 | Anisotropy = |     |         | 8.4891 |
| XX=          | 29.6389     | YX=     | 3.9466       | ZX= | 1.2669  |        |
| XY=          | 3.7889      | YY=     | 29.4054      | ZY= | 2.2576  |        |
| XZ=          | 1.5158      | YZ=     | 3.6106       | ZZ= | 33.2596 |        |
| Eigenvalues: | 25.4578     |         | 30.4187      |     | 36.4274 |        |
| 66 H         | Isotropic = | 31.1709 | Anisotropy = |     |         | 8.6482 |
| XX=          | 32.1432     | YX=     | -0.2857      | ZX= | -3.1158 |        |
| XY=          | -0.6508     | YY=     | 29.2355      | ZY= | 2.1832  |        |
| XZ=          | -5.3462     | YZ=     | 2.7077       | ZZ= | 32.1340 |        |
| Eigenvalues: | 26.8811     |         | 29.6952      |     | 36.9364 |        |
| 67 H         | Isotropic = | 31.0963 | Anisotropy = |     |         | 9.3721 |
| XX=          | 31.8240     | YX=     | -1.0700      | ZX= | -4.3855 |        |
| XY=          | -1.5358     | YY=     | 29.2485      | ZY= | 1.6616  |        |
| XZ=          | -5.3446     | YZ=     | 1.1592       | ZZ= | 32.2164 |        |
| Eigenvalues: | 27.1504     |         | 28.7941      |     | 37.3444 |        |
| 68 H         | Isotropic = | 30.7505 | Anisotropy = |     |         | 6.2979 |
| XX=          | 29.4042     | YX=     | 3.8417       | ZX= | -1.1353 |        |
| XY=          | 3.4804      | YY=     | 31.3686      | ZY= | 2.4433  |        |
| XZ=          | 0.3306      | YZ=     | 2.0895       | ZZ= | 31.4786 |        |
| Eigenvalues: | 26.0353     |         | 31.2671      |     | 34.9491 |        |
| 69 H         | Isotropic = | 30.6783 | Anisotropy = |     |         | 7.7451 |
| XX=          | 26.6800     | YX=     | -0.3766      | ZX= | -0.2845 |        |
| XY=          | -1.2459     | YY=     | 30.8679      | ZY= | -2.0286 |        |
| XZ=          | 0.3546      | YZ=     | -3.1187      | ZZ= | 34.4872 |        |
| Eigenvalues: | 26.4990     |         | 29.6943      |     | 35.8418 |        |
| 70 H         | Isotropic = | 30.6592 | Anisotropy = |     |         | 7.3038 |
| XX=          | 32.6010     | YX=     | -3.1592      | ZX= | 1.1743  |        |
| XY=          | -3.4446     | YY=     | 29.2748      | ZY= | -1.6682 |        |
| XZ=          | 1.0968      | YZ=     | -2.8727      | ZZ= | 30.1018 |        |
| Eigenvalues: | 26.6233     |         | 29.8258      |     | 35.5284 |        |
| 71 H         | Isotropic = | 30.1875 | Anisotropy = |     |         | 6.9285 |
| XX=          | 29.4450     | YX=     | 4.7598       | ZX= | 0.0806  |        |
| XY=          | 3.8928      | YY=     | 31.2889      | ZY= | -0.1255 |        |
| XZ=          | -0.1491     | YZ=     | 0.9084       | ZZ= | 29.8286 |        |
| Eigenvalues: | 25.9244     |         | 29.8317      |     | 34.8065 |        |
| 72 H         | Isotropic = | 30.6099 | Anisotropy = |     |         | 8.9358 |
| XX=          | 28.6281     | YX=     | 0.8215       | ZX= | -1.6735 |        |
| XY=          | 0.3058      | YY=     | 27.1748      | ZY= | -0.2010 |        |
| XZ=          | -2.3137     | YZ=     | -0.7324      | ZZ= | 36.0269 |        |
| Eigenvalues: | 26.9757     |         | 28.2871      |     | 36.5671 |        |

**Chemical Shielding tensors (GIAO MPW1PW91/6-311+G(2d,p) iefpcm = DMSO)**  
**3S\*,7S\*,11R\*-1b**

**Conf 3 (49 %)**

|    |   |              |          |              |          |
|----|---|--------------|----------|--------------|----------|
| 1  | C | Isotropic =  | 72.8958  | Anisotropy = | 130.9830 |
|    |   | XX=          | 71.6122  | YX=          | 19.6490  |
|    |   | XY=          | 2.7807   | YY=          | 35.4385  |
|    |   | XZ=          | -48.2582 | YZ=          | 58.1589  |
|    |   |              |          | ZZ=          | 111.6366 |
|    |   | Eigenvalues: | -8.3854  | 66.8549      | 160.2178 |
| 2  | C | Isotropic =  | 27.4929  | Anisotropy = | 128.2581 |
|    |   | XX=          | -13.3201 | YX=          | -25.7359 |
|    |   | XY=          | -28.3892 | YY=          | 24.0134  |
|    |   | XZ=          | -62.4674 | YZ=          | 15.1514  |
|    |   |              |          | ZZ=          | 71.7855  |
|    |   | Eigenvalues: | -50.6208 | 20.1013      | 112.9983 |
| 3  | C | Isotropic =  | 67.4958  | Anisotropy = | 126.4549 |
|    |   | XX=          | 74.4691  | YX=          | -44.3964 |
|    |   | XY=          | -37.0452 | YY=          | 9.1145   |
|    |   | XZ=          | -37.5457 | YZ=          | 28.6862  |
|    |   |              |          | ZZ=          | 118.9039 |
|    |   | Eigenvalues: | -11.6905 | 62.3789      | 151.7991 |
| 4  | C | Isotropic =  | 60.6888  | Anisotropy = | 169.7838 |
|    |   | XX=          | 44.7747  | YX=          | -1.6168  |
|    |   | XY=          | -5.2951  | YY=          | 17.1466  |
|    |   | XZ=          | -55.2501 | YZ=          | 59.4187  |
|    |   |              |          | ZZ=          | 120.1450 |
|    |   | Eigenvalues: | -19.7455 | 27.9338      | 173.8780 |
| 5  | C | Isotropic =  | 34.4245  | Anisotropy = | 118.3110 |
|    |   | XX=          | -8.9272  | YX=          | -27.3680 |
|    |   | XY=          | -28.6517 | YY=          | 40.3026  |
|    |   | XZ=          | -59.1404 | YZ=          | 17.8105  |
|    |   |              |          | ZZ=          | 71.8982  |
|    |   | Eigenvalues: | -45.1003 | 35.0753      | 113.2985 |
| 6  | C | Isotropic =  | 53.9148  | Anisotropy = | 164.6205 |
|    |   | XX=          | 49.7050  | YX=          | -40.0039 |
|    |   | XY=          | -35.0046 | YY=          | -7.2828  |
|    |   | XZ=          | -55.0814 | YZ=          | 34.2842  |
|    |   |              |          | ZZ=          | 119.3222 |
|    |   | Eigenvalues: | -26.9240 | 25.0066      | 163.6618 |
| 7  | C | Isotropic =  | 160.7321 | Anisotropy = | 19.8168  |
|    |   | XX=          | 165.6421 | YX=          | -5.2057  |
|    |   | XY=          | -8.6018  | YY=          | 158.4895 |
|    |   | XZ=          | 11.4260  | YZ=          | -1.8296  |
|    |   |              |          | ZZ=          | 158.0646 |
|    |   | Eigenvalues: | 152.7134 | 155.5396     | 173.9433 |
| 8  | C | Isotropic =  | 153.9884 | Anisotropy = | 9.3476   |
|    |   | XX=          | 148.0355 | YX=          | 3.7609   |
|    |   | XY=          | -4.8312  | YY=          | 157.0343 |
|    |   | XZ=          | 3.1886   | YZ=          | -0.8794  |
|    |   |              |          | ZZ=          | 156.8953 |
|    |   | Eigenvalues: | 148.0038 | 153.7413     | 160.2201 |
| 9  | C | Isotropic =  | 103.4813 | Anisotropy = | 46.9310  |
|    |   | XX=          | 103.1209 | YX=          | -12.0807 |
|    |   | XY=          | -14.5336 | YY=          | 95.1224  |
|    |   | XZ=          | 7.1273   | YZ=          | -22.9598 |
|    |   |              |          | ZZ=          | 112.2007 |
|    |   | Eigenvalues: | 79.3466  | 96.3287      | 134.7687 |
| 10 | O | Isotropic =  | 189.5549 | Anisotropy = | 101.8438 |
|    |   | XX=          | 191.6327 | YX=          | 7.0639   |
|    |   | XY=          | 8.6448   | YY=          | 156.1819 |
|    |   | XZ=          | -52.2553 | YZ=          | 3.5439   |
|    |   |              |          | ZZ=          | 220.8502 |
|    |   | Eigenvalues: | 135.6126 | 175.6013     | 257.4508 |
| 11 | C | Isotropic =  | 146.1883 | Anisotropy = | 45.7299  |
|    |   | XX=          | 145.4043 | YX=          | 17.1289  |
|    |   | XY=          | 10.8039  | YY=          | 167.4313 |
|    |   | XZ=          | 13.3454  | YZ=          | 11.6411  |
|    |   |              |          | ZZ=          | 125.7294 |
|    |   | Eigenvalues: | 120.1608 | 141.7293     | 176.6749 |
| 12 | C | Isotropic =  | 40.8215  | Anisotropy = | 145.5230 |
|    |   | XX=          | 41.3187  | YX=          | 70.3575  |
|    |   | XY=          | 72.5977  | YY=          | 23.2662  |
|    |   | XZ=          | 58.6664  | YZ=          | 1.8814   |
|    |   |              |          | ZZ=          | 57.8796  |
|    |   | Eigenvalues: | -53.8091 | 38.4367      | 137.8368 |
| 13 | C | Isotropic =  | 26.7400  | Anisotropy = | 176.9246 |
|    |   | XX=          | 30.3231  | YX=          | 74.8940  |
|    |   | XY=          | 72.9022  | YY=          | 5.8441   |
|    |   | XZ=          | 83.7953  | YZ=          | -4.9571  |
|    |   |              |          | ZZ=          | 44.0529  |
|    |   | Eigenvalues: | -81.2888 | 16.8190      | 144.6898 |
| 14 | C | Isotropic =  | 137.6662 | Anisotropy = | 31.8308  |
|    |   | XX=          | 156.1232 | YX=          | 3.5590   |
|    |   | XY=          | 6.8255   | YY=          | 120.6691 |
|    |   | XZ=          | -3.5323  | YZ=          | 5.7361   |
|    |   |              |          | ZZ=          | 136.2065 |
|    |   | Eigenvalues: | 117.7377 | 136.3742     | 158.8868 |
| 15 | C | Isotropic =  | 166.3961 | Anisotropy = | 26.0132  |
|    |   | XX=          | 163.8033 | YX=          | 6.7467   |
|    |   | XY=          | 7.1240   | YY=          | 180.5481 |
|    |   | XZ=          | -0.1029  | YZ=          | -5.5948  |
|    |   |              |          | ZZ=          | 154.8369 |
|    |   | Eigenvalues: | 152.9915 | 162.4585     | 183.7383 |

|              |           |             |           |              |           |
|--------------|-----------|-------------|-----------|--------------|-----------|
| 16           | O         | Isotropic = | 235.6971  | Anisotropy = | 77.8094   |
| XX=          | 264.8299  | YX=         | 26.5314   | ZX=          | -15.4388  |
| XY=          | 61.2667   | YY=         | 198.1722  | ZY=          | 62.9638   |
| XZ=          | -27.0589  | YZ=         | 40.0445   | ZZ=          | 244.0891  |
| Eigenvalues: | 145.1321  | 274.3891    | 287.5700  |              |           |
| 17           | C         | Isotropic = | 132.1095  | Anisotropy = | 72.5252   |
| XX=          | 131.9972  | YX=         | -29.2047  | ZX=          | 22.4218   |
| XY=          | -25.5618  | YY=         | 131.6262  | ZY=          | -22.3032  |
| XZ=          | 20.8804   | YZ=         | -24.5156  | ZZ=          | 132.7050  |
| Eigenvalues: | 104.2451  | 111.6238    | 180.4596  |              |           |
| 18           | C         | Isotropic = | 110.1647  | Anisotropy = | 47.3314   |
| XX=          | 131.0298  | YX=         | 2.8722    | ZX=          | -20.8674  |
| XY=          | -0.9484   | YY=         | 99.7254   | ZY=          | -3.4939   |
| XZ=          | -21.1121  | YZ=         | -4.0439   | ZZ=          | 99.7390   |
| Eigenvalues: | 88.4329   | 100.3422    | 141.7190  |              |           |
| 19           | C         | Isotropic = | 160.3296  | Anisotropy = | 35.6914   |
| XX=          | 154.4781  | YX=         | 5.4846    | ZX=          | 3.8134    |
| XY=          | -0.6471   | YY=         | 142.8244  | ZY=          | 4.4692    |
| XZ=          | 0.6284    | YZ=         | 1.8448    | ZZ=          | 183.6864  |
| Eigenvalues: | 142.1691  | 154.6959    | 184.1239  |              |           |
| 20           | O         | Isotropic = | 236.2591  | Anisotropy = | 64.7785   |
| XX=          | 212.9671  | YX=         | 5.9567    | ZX=          | -8.5972   |
| XY=          | 3.2209    | YY=         | 223.4930  | ZY=          | 13.6236   |
| XZ=          | -21.3517  | YZ=         | 17.3494   | ZZ=          | 272.3171  |
| Eigenvalues: | 205.2213  | 224.1112    | 279.4447  |              |           |
| 21           | C         | Isotropic = | 153.4209  | Anisotropy = | 49.7787   |
| XX=          | 147.5416  | YX=         | -18.9776  | ZX=          | 7.1092    |
| XY=          | -18.5395  | YY=         | 169.5952  | ZY=          | -14.8252  |
| XZ=          | 8.9299    | YZ=         | -14.0705  | ZZ=          | 143.1259  |
| Eigenvalues: | 136.6269  | 137.0291    | 186.6067  |              |           |
| 22           | C         | Isotropic = | -29.3753  | Anisotropy = | 190.0990  |
| XX=          | -28.0348  | YX=         | 79.9274   | ZX=          | 61.9460   |
| XY=          | 77.7048   | YY=         | 0.1519    | ZY=          | 32.0617   |
| XZ=          | 63.9771   | YZ=         | 43.7743   | ZZ=          | -60.2429  |
| Eigenvalues: | -114.6793 | -70.8039    | 97.3574   |              |           |
| 23           | C         | Isotropic = | 126.4562  | Anisotropy = | 30.4625   |
| XX=          | 121.1844  | YX=         | -0.8320   | ZX=          | -6.2827   |
| XY=          | -16.1967  | YY=         | 143.5813  | ZY=          | 2.0622    |
| XZ=          | -8.4949   | YZ=         | -0.5037   | ZZ=          | 114.6030  |
| Eigenvalues: | 109.2911  | 123.3130    | 146.7646  |              |           |
| 24           | C         | Isotropic = | 135.6663  | Anisotropy = | 27.4731   |
| XX=          | 139.1468  | YX=         | -9.9447   | ZX=          | -22.5395  |
| XY=          | -6.0642   | YY=         | 139.1190  | ZY=          | -12.6605  |
| XZ=          | -16.0799  | YZ=         | -5.9812   | ZZ=          | 128.7332  |
| Eigenvalues: | 108.9509  | 144.0664    | 153.9817  |              |           |
| 25           | C         | Isotropic = | 139.5646  | Anisotropy = | 38.0633   |
| XX=          | 141.4731  | YX=         | -14.4302  | ZX=          | -8.5477   |
| XY=          | -13.4195  | YY=         | 139.3238  | ZY=          | 18.4788   |
| XZ=          | -5.3476   | YZ=         | 14.9223   | ZZ=          | 137.8969  |
| Eigenvalues: | 120.4440  | 133.3097    | 164.9401  |              |           |
| 26           | C         | Isotropic = | 154.8167  | Anisotropy = | 32.0960   |
| XX=          | 144.8115  | YX=         | -10.5527  | ZX=          | -18.2601  |
| XY=          | -11.2823  | YY=         | 164.3164  | ZY=          | 9.0204    |
| XZ=          | -16.2574  | YZ=         | -1.7942   | ZZ=          | 155.3222  |
| Eigenvalues: | 130.6263  | 157.6098    | 176.2141  |              |           |
| 27           | C         | Isotropic = | 164.9700  | Anisotropy = | 28.3161   |
| XX=          | 157.1185  | YX=         | -9.5667   | ZX=          | -18.7035  |
| XY=          | -8.1736   | YY=         | 173.8054  | ZY=          | -12.5546  |
| XZ=          | -19.3760  | YZ=         | -13.4556  | ZZ=          | 163.9859  |
| Eigenvalues: | 135.1991  | 175.8635    | 183.8473  |              |           |
| 28           | C         | Isotropic = | 148.9671  | Anisotropy = | 44.2300   |
| XX=          | 158.2634  | YX=         | -25.2727  | ZX=          | -7.7995   |
| XY=          | -21.8561  | YY=         | 149.5452  | ZY=          | -6.5039   |
| XZ=          | -14.4279  | YZ=         | -5.7637   | ZZ=          | 139.0926  |
| Eigenvalues: | 121.7157  | 146.7319    | 178.4537  |              |           |
| 29           | C         | Isotropic = | 164.2012  | Anisotropy = | 36.2010   |
| XX=          | 172.5277  | YX=         | 12.5499   | ZX=          | 15.2199   |
| XY=          | 12.6796   | YY=         | 159.6341  | ZY=          | 2.1859    |
| XZ=          | 16.0272   | YZ=         | 3.3428    | ZZ=          | 160.4418  |
| Eigenvalues: | 147.0162  | 157.2522    | 188.3352  |              |           |
| 30           | C         | Isotropic = | 164.4095  | Anisotropy = | 32.0602   |
| XX=          | 168.6821  | YX=         | 9.4927    | ZX=          | 10.1810   |
| XY=          | 9.5044    | YY=         | 153.9115  | ZY=          | 12.1277   |
| XZ=          | 4.4693    | YZ=         | 15.4798   | ZZ=          | 170.6349  |
| Eigenvalues: | 145.0386  | 162.4068    | 185.7830  |              |           |
| 31           | O         | Isotropic = | -258.6251 | Anisotropy = | 926.9569  |
| XX=          | -74.9499  | YX=         | 257.2012  | ZX=          | 240.7453  |
| XY=          | 262.8885  | YY=         | -127.6204 | ZY=          | 348.6854  |
| XZ=          | 232.4658  | YZ=         | 399.9540  | ZZ=          | -573.3049 |

|              |             |           |              |         |
|--------------|-------------|-----------|--------------|---------|
| Eigenvalues: | -796.2271   | -338.9943 | 359.3462     |         |
| 32 C         | Isotropic = | 161.7412  | Anisotropy = | 40.0831 |
| XX=          | 150.4412    | YX=       | -9.1411      | ZX=     |
| XY=          | -8.0182     | YY=       | 154.4635     | ZY=     |
| XZ=          | -15.3251    | YZ=       | 2.8847       | ZZ=     |
| Eigenvalues: | 139.7896    | 156.9708  | 188.4633     |         |
| 33 H         | Isotropic = | 25.1164   | Anisotropy = | 9.6733  |
| XX=          | 28.1958     | YX=       | 3.8380       | ZX=     |
| XY=          | 3.8985      | YY=       | 25.6007      | ZY=     |
| XZ=          | 2.7850      | YZ=       | 0.1658       | ZZ=     |
| Eigenvalues: | 20.1948     | 23.5891   | 31.5653      |         |
| 34 H         | Isotropic = | 24.9586   | Anisotropy = | 8.4113  |
| XX=          | 27.8312     | YX=       | -0.3827      | ZX=     |
| XY=          | -0.3653     | YY=       | 23.6835      | ZY=     |
| XZ=          | 4.5236      | YZ=       | -1.0808      | ZZ=     |
| Eigenvalues: | 20.5045     | 23.8051   | 30.5662      |         |
| 35 H         | Isotropic = | 29.0318   | Anisotropy = | 9.1429  |
| XX=          | 29.1472     | YX=       | 0.7415       | ZX=     |
| XY=          | 2.1283      | YY=       | 33.7281      | ZY=     |
| XZ=          | 2.1301      | YZ=       | 3.3710       | ZZ=     |
| Eigenvalues: | 22.9487     | 29.0197   | 35.1271      |         |
| 36 H         | Isotropic = | 28.8575   | Anisotropy = | 8.3668  |
| XX=          | 29.4420     | YX=       | 3.2651       | ZX=     |
| XY=          | 3.2431      | YY=       | 26.7528      | ZY=     |
| XZ=          | -1.0243     | YZ=       | -4.1574      | ZZ=     |
| Eigenvalues: | 23.9315     | 28.2057   | 34.4353      |         |
| 37 H         | Isotropic = | 29.7547   | Anisotropy = | 11.3039 |
| XX=          | 35.0317     | YX=       | 0.5809       | ZX=     |
| XY=          | -0.3260     | YY=       | 27.7799      | ZY=     |
| XZ=          | -5.0318     | YZ=       | 3.7909       | ZZ=     |
| Eigenvalues: | 22.5584     | 29.4149   | 37.2906      |         |
| 38 H         | Isotropic = | 30.0818   | Anisotropy = | 6.5434  |
| XX=          | 31.7529     | YX=       | -0.9642      | ZX=     |
| XY=          | -1.6295     | YY=       | 31.2945      | ZY=     |
| XZ=          | 1.8683      | YZ=       | -3.5548      | ZZ=     |
| Eigenvalues: | 25.1976     | 30.6037   | 34.4441      |         |
| 39 H         | Isotropic = | 28.5976   | Anisotropy = | 11.6356 |
| XX=          | 33.9049     | YX=       | 3.2050       | ZX=     |
| XY=          | 3.3426      | YY=       | 28.7715      | ZY=     |
| XZ=          | -0.9767     | YZ=       | -4.6082      | ZZ=     |
| Eigenvalues: | 21.0299     | 28.4082   | 36.3547      |         |
| 40 H         | Isotropic = | 28.6613   | Anisotropy = | 2.8313  |
| XX=          | 28.2004     | YX=       | -1.5525      | ZX=     |
| XY=          | 0.0388      | YY=       | 28.0711      | ZY=     |
| XZ=          | 0.0294      | YZ=       | -0.9798      | ZZ=     |
| Eigenvalues: | 27.1642     | 28.2709   | 30.5488      |         |
| 41 H         | Isotropic = | 29.7877   | Anisotropy = | 3.8314  |
| XX=          | 31.6001     | YX=       | -0.8789      | ZX=     |
| XY=          | -1.9396     | YY=       | 25.9897      | ZY=     |
| XZ=          | 0.4581      | YZ=       | -1.2458      | ZZ=     |
| Eigenvalues: | 25.6521     | 31.3690   | 32.3419      |         |
| 42 H         | Isotropic = | 28.4001   | Anisotropy = | 7.1845  |
| XX=          | 27.7096     | YX=       | 3.4668       | ZX=     |
| XY=          | 2.5439      | YY=       | 31.1919      | ZY=     |
| XZ=          | -3.0607     | YZ=       | 0.4347       | ZZ=     |
| Eigenvalues: | 23.9528     | 28.0576   | 33.1897      |         |
| 43 H         | Isotropic = | 29.3304   | Anisotropy = | 9.5111  |
| XX=          | 34.7231     | YX=       | 1.3271       | ZX=     |
| XY=          | 1.6516      | YY=       | 26.5330      | ZY=     |
| XZ=          | -2.3310     | YZ=       | -4.0964      | ZZ=     |
| Eigenvalues: | 23.3307     | 28.9894   | 35.6711      |         |
| 44 H         | Isotropic = | 29.8873   | Anisotropy = | 8.7241  |
| XX=          | 31.2905     | YX=       | -0.9476      | ZX=     |
| XY=          | -2.3600     | YY=       | 32.0137      | ZY=     |
| XZ=          | 3.7863      | YZ=       | -2.5679      | ZZ=     |
| Eigenvalues: | 23.9344     | 30.0242   | 35.7034      |         |
| 45 H         | Isotropic = | 29.3293   | Anisotropy = | 5.6738  |
| XX=          | 28.0170     | YX=       | -0.7022      | ZX=     |
| XY=          | 1.1986      | YY=       | 31.1833      | ZY=     |
| XZ=          | 3.2137      | YZ=       | 2.1474       | ZZ=     |
| Eigenvalues: | 25.1947     | 29.6815   | 33.1119      |         |
| 46 H         | Isotropic = | 27.9177   | Anisotropy = | 9.0560  |
| XX=          | 31.4549     | YX=       | 1.2826       | ZX=     |
| XY=          | -0.4445     | YY=       | 26.1896      | ZY=     |
| XZ=          | 4.7616      | YZ=       | -0.3342      | ZZ=     |
| Eigenvalues: | 23.3070     | 26.4911   | 33.9551      |         |
| 47 H         | Isotropic = | 28.1710   | Anisotropy = | 8.2777  |
| XX=          | 30.1753     | YX=       | -4.4366      | ZX=     |
| XY=          | -2.8850     | YY=       | 29.8113      | ZY=     |



|              |             |     |         |              |         |         |
|--------------|-------------|-----|---------|--------------|---------|---------|
| XZ=          | 0.4633      | YZ= | -0.9500 | ZZ=          | 24.5265 |         |
| Eigenvalues: | 24.4176     |     | 26.4059 |              | 33.6895 |         |
| 48 H         | Isotropic = |     | 28.1896 | Anisotropy = |         | 8.0237  |
| XX=          | 26.3206     | YX= | -1.0190 | ZX=          | 2.4855  |         |
| XY=          | 1.1440      | YY= | 26.6413 | ZY=          | -2.8846 |         |
| XZ=          | 1.6066      | YZ= | -3.2578 | ZZ=          | 31.6068 |         |
| Eigenvalues: | 24.5420     |     | 26.4880 |              | 33.5387 |         |
| 49 H         | Isotropic = |     | 30.5854 | Anisotropy = |         | 4.6326  |
| XX=          | 28.3781     | YX= | -0.3230 | ZX=          | 2.5449  |         |
| XY=          | -0.8791     | YY= | 32.9691 | ZY=          | -0.0221 |         |
| XZ=          | 2.7126      | YZ= | -1.6150 | ZZ=          | 30.4090 |         |
| Eigenvalues: | 26.5753     |     | 31.5071 |              | 33.6738 |         |
| 50 H         | Isotropic = |     | 30.6324 | Anisotropy = |         | 9.2374  |
| XX=          | 29.3043     | YX= | 4.1377  | ZX=          | 2.1343  |         |
| XY=          | 2.7672      | YY= | 32.4736 | ZY=          | 2.4386  |         |
| XZ=          | 2.4828      | YZ= | 3.4919  | ZZ=          | 30.1194 |         |
| Eigenvalues: | 26.9998     |     | 28.1068 |              | 36.7907 |         |
| 51 H         | Isotropic = |     | 30.9881 | Anisotropy = |         | 6.5805  |
| XX=          | 30.7219     | YX= | 0.3679  | ZX=          | -2.9621 |         |
| XY=          | -0.2933     | YY= | 29.8817 | ZY=          | 1.4377  |         |
| XZ=          | -4.1110     | YZ= | 1.2969  | ZZ=          | 32.3608 |         |
| Eigenvalues: | 27.5562     |     | 30.0331 |              | 35.3751 |         |
| 52 H         | Isotropic = |     | 30.4224 | Anisotropy = |         | 15.7210 |
| XX=          | 25.8916     | YX= | 1.5589  | ZX=          | -4.7641 |         |
| XY=          | -0.7169     | YY= | 29.4541 | ZY=          | 5.6612  |         |
| XZ=          | -3.4801     | YZ= | 7.8408  | ZZ=          | 35.9216 |         |
| Eigenvalues: | 22.6891     |     | 27.6751 |              | 40.9031 |         |
| 53 H         | Isotropic = |     | 30.5462 | Anisotropy = |         | 7.2837  |
| XX=          | 28.0407     | YX= | -0.5821 | ZX=          | 1.9849  |         |
| XY=          | -0.9486     | YY= | 30.5992 | ZY=          | -4.0070 |         |
| XZ=          | 1.0053      | YZ= | -1.9806 | ZZ=          | 32.9985 |         |
| Eigenvalues: | 27.6216     |     | 28.6149 |              | 35.4020 |         |
| 54 H         | Isotropic = |     | 30.5202 | Anisotropy = |         | 7.5428  |
| XX=          | 34.0438     | YX= | -2.1046 | ZX=          | -1.0752 |         |
| XY=          | -3.0650     | YY= | 30.9897 | ZY=          | -0.2251 |         |
| XZ=          | -0.6439     | YZ= | -0.7088 | ZZ=          | 26.5270 |         |
| Eigenvalues: | 26.2842     |     | 29.7276 |              | 35.5487 |         |
| 55 H         | Isotropic = |     | 30.3995 | Anisotropy = |         | 9.2304  |
| XX=          | 27.3962     | YX= | 0.5507  | ZX=          | 0.7982  |         |
| XY=          | 1.9393      | YY= | 36.3714 | ZY=          | -0.0511 |         |
| XZ=          | 0.4566      | YZ= | -0.7885 | ZZ=          | 27.4307 |         |
| Eigenvalues: | 26.6381     |     | 28.0073 |              | 36.5530 |         |
| 56 H         | Isotropic = |     | 29.1428 | Anisotropy = |         | 3.6516  |
| XX=          | 30.1688     | YX= | -1.5203 | ZX=          | 0.4573  |         |
| XY=          | -0.2601     | YY= | 25.9044 | ZY=          | 0.8116  |         |
| XZ=          | 0.6498      | YZ= | 0.1892  | ZZ=          | 31.3552 |         |
| Eigenvalues: | 25.6624     |     | 30.1888 |              | 31.5772 |         |
| 57 H         | Isotropic = |     | 29.3023 | Anisotropy = |         | 8.7377  |
| XX=          | 32.7993     | YX= | -0.2262 | ZX=          | -4.4465 |         |
| XY=          | -0.0325     | YY= | 28.4206 | ZY=          | -1.7050 |         |
| XZ=          | -4.3662     | YZ= | -0.4287 | ZZ=          | 26.6871 |         |
| Eigenvalues: | 24.1438     |     | 28.6358 |              | 35.1275 |         |
| 58 H         | Isotropic = |     | 29.7142 | Anisotropy = |         | 8.0521  |
| XX=          | 26.8450     | YX= | -0.4682 | ZX=          | 0.6318  |         |
| XY=          | -1.0434     | YY= | 27.2623 | ZY=          | 0.1035  |         |
| XZ=          | 0.4307      | YZ= | -0.6324 | ZZ=          | 35.0354 |         |
| Eigenvalues: | 26.2616     |     | 27.7988 |              | 35.0823 |         |
| 59 H         | Isotropic = |     | 30.2864 | Anisotropy = |         | 9.3601  |
| XX=          | 32.0402     | YX= | 2.0749  | ZX=          | -4.4136 |         |
| XY=          | 2.2486      | YY= | 29.8472 | ZY=          | -1.6879 |         |
| XZ=          | -4.6719     | YZ= | -2.0969 | ZZ=          | 28.9717 |         |
| Eigenvalues: | 25.6880     |     | 28.6447 |              | 36.5265 |         |
| 60 H         | Isotropic = |     | 30.0171 | Anisotropy = |         | 11.8577 |
| XX=          | 36.5838     | YX= | -3.5506 | ZX=          | -0.4456 |         |
| XY=          | -3.8861     | YY= | 27.5018 | ZY=          | -0.8102 |         |
| XZ=          | -0.8292     | YZ= | -0.6772 | ZZ=          | 25.9656 |         |
| Eigenvalues: | 25.1437     |     | 26.9853 |              | 37.9222 |         |
| 61 H         | Isotropic = |     | 30.0423 | Anisotropy = |         | 11.6858 |
| XX=          | 26.2547     | YX= | -1.8187 | ZX=          | -2.2717 |         |
| XY=          | -1.6374     | YY= | 33.1935 | ZY=          | 5.0828  |         |
| XZ=          | -2.1508     | YZ= | 5.1190  | ZZ=          | 30.6787 |         |
| Eigenvalues: | 25.3008     |     | 26.9932 |              | 37.8328 |         |
| 62 H         | Isotropic = |     | 29.9606 | Anisotropy = |         | 8.0162  |
| XX=          | 30.0082     | YX= | -2.1723 | ZX=          | 3.1767  |         |
| XY=          | -2.7277     | YY= | 27.9413 | ZY=          | -2.4620 |         |
| XZ=          | 2.4076      | YZ= | -1.8369 | ZZ=          | 31.9323 |         |
| Eigenvalues: | 26.2973     |     | 28.2798 |              | 35.3047 |         |
| 63 H         | Isotropic = |     | 30.2876 | Anisotropy = |         | 8.7067  |
| XX=          | 28.4087     | YX= | -0.0835 | ZX=          | -1.3197 |         |

|              |             |         |              |     |         |        |
|--------------|-------------|---------|--------------|-----|---------|--------|
| XY=          | 0.2517      | YY=     | 35.6393      | ZY= | -1.8317 |        |
| XZ=          | -1.4651     | YZ=     | -2.1766      | ZZ= | 26.8148 |        |
| Eigenvalues: | 25.7093     |         | 29.0614      |     | 36.0920 |        |
| 64 H         | Isotropic = | 30.7183 | Anisotropy = |     |         | 6.7698 |
| XX=          | 33.5652     | YX=     | -2.3368      | ZX= | 2.1101  |        |
| XY=          | -2.6535     | YY=     | 30.2532      | ZY= | 1.2215  |        |
| XZ=          | 2.4005      | YZ=     | 1.1639       | ZZ= | 28.3365 |        |
| Eigenvalues: | 26.3510     |         | 30.5724      |     | 35.2315 |        |
| 65 H         | Isotropic = | 30.8287 | Anisotropy = |     |         | 7.8717 |
| XX=          | 30.8183     | YX=     | 1.7194       | ZX= | 0.5215  |        |
| XY=          | 0.7203      | YY=     | 28.0563      | ZY= | 4.0871  |        |
| XZ=          | -0.8226     | YZ=     | 4.7097       | ZZ= | 33.6113 |        |
| Eigenvalues: | 25.3911     |         | 31.0184      |     | 36.0765 |        |
| 66 H         | Isotropic = | 31.3950 | Anisotropy = |     |         | 9.0529 |
| XX=          | 33.2362     | YX=     | 4.4178       | ZX= | -1.6814 |        |
| XY=          | 3.5968      | YY=     | 33.5898      | ZY= | -0.0692 |        |
| XZ=          | -0.9256     | YZ=     | 1.8888       | ZZ= | 27.3590 |        |
| Eigenvalues: | 26.5026     |         | 30.2522      |     | 37.4303 |        |
| 67 H         | Isotropic = | 30.8618 | Anisotropy = |     |         | 9.0690 |
| XX=          | 32.5252     | YX=     | 3.7507       | ZX= | -0.9874 |        |
| XY=          | 4.2830      | YY=     | 33.1208      | ZY= | -0.7221 |        |
| XZ=          | -0.3680     | YZ=     | -0.0755      | ZZ= | 26.9395 |        |
| Eigenvalues: | 26.8565     |         | 28.8211      |     | 36.9078 |        |
| 68 H         | Isotropic = | 30.5882 | Anisotropy = |     |         | 6.4970 |
| XX=          | 30.8752     | YX=     | -0.3487      | ZX= | -0.0587 |        |
| XY=          | 0.7432      | YY=     | 29.4481      | ZY= | 4.6767  |        |
| XZ=          | -1.7718     | YZ=     | 3.8663       | ZZ= | 31.4412 |        |
| Eigenvalues: | 25.9513     |         | 30.8937      |     | 34.9195 |        |
| 69 H         | Isotropic = | 30.6630 | Anisotropy = |     |         | 8.3170 |
| XX=          | 34.1391     | YX=     | -1.9518      | ZX= | 4.2115  |        |
| XY=          | -0.4895     | YY=     | 29.6308      | ZY= | 0.6107  |        |
| XZ=          | 3.6323      | YZ=     | 0.4202       | ZZ= | 28.2191 |        |
| Eigenvalues: | 25.9826     |         | 29.7987      |     | 36.2076 |        |
| 70 H         | Isotropic = | 30.9575 | Anisotropy = |     |         | 9.7359 |
| XX=          | 27.7442     | YX=     | -0.0262      | ZX= | -0.5868 |        |
| XY=          | -0.5303     | YY=     | 28.7822      | ZY= | -2.7359 |        |
| XZ=          | 0.5451      | YZ=     | -3.4427      | ZZ= | 36.3462 |        |
| Eigenvalues: | 27.4413     |         | 27.9831      |     | 37.4482 |        |
| 71 H         | Isotropic = | 30.6154 | Anisotropy = |     |         | 7.3830 |
| XX=          | 28.0310     | YX=     | -1.0357      | ZX= | -2.4031 |        |
| XY=          | 0.9517      | YY=     | 32.5379      | ZY= | 2.7455  |        |
| XZ=          | -0.6579     | YZ=     | 4.1196       | ZZ= | 31.2774 |        |
| Eigenvalues: | 26.9867     |         | 29.3221      |     | 35.5374 |        |
| 72 H         | Isotropic = | 30.1126 | Anisotropy = |     |         | 6.6646 |
| XX=          | 33.0690     | YX=     | 1.1089       | ZX= | -2.8263 |        |
| XY=          | 0.6247      | YY=     | 26.0041      | ZY= | 2.1699  |        |
| XZ=          | -1.5931     | YZ=     | 0.8650       | ZZ= | 31.2648 |        |
| Eigenvalues: | 25.3210     |         | 30.4611      |     | 34.5557 |        |

## **11. Alignment tensors**

## Alignment tensor of $^{13}\text{C}$ RCSA analysis of

### Estrone

### 13-epi-estrone

Alignment tensor

$A'_x = 7.951\text{e-}05$

$A'_y = 1.509\text{e-}04$

$A'_z = -2.304\text{e-}04$

Saupe tensor

$S'_x = 1.193\text{e-}04$

$S'_y = 2.264\text{e-}04$

$S'_z = -3.457\text{e-}04$

Alignment tensor eigenvectors

$e[x] = (-0.184, 0.171, 0.968)$

$e[y] = (0.126, -0.972, 0.196)$

$e[z] = (0.975, 0.158, 0.158)$

Alignment tensor

$A'_x = -2.338\text{e-}05$

$A'_y = -2.466\text{e-}04$

$A'_z = 2.700\text{e-}04$

Saupe tensor

$S'_x = -3.507\text{e-}05$

$S'_y = -3.699\text{e-}04$

$S'_z = 4.050\text{e-}04$

Alignment tensor eigenvectors

$e[x] = (0.214, 0.749, 0.627)$

$e[y] = (0.954, -0.024, -0.298)$

$e[z] = (-0.208, 0.662, -0.720)$

Alignment tensor in laboratory coordinates:

$[-2.138\text{e-}04, -5.652\text{e-}05, -4.591\text{e-}05]$

$[-5.652\text{e-}05, 1.393\text{e-}04, -2.134\text{e-}05]$

$[-4.591\text{e-}05, -2.134\text{e-}05, 7.453\text{e-}05]$

Alignment tensor in laboratory coordinates:

$[-2.140\text{e-}04, -3.537\text{e-}05, 1.074\text{e-}04]$

$[-3.537\text{e-}05, 1.049\text{e-}04, -1.414\text{e-}04]$

$[1.074\text{e-}04, -1.414\text{e-}04, 1.090\text{e-}04]$

SVD condition number is  $1.429\text{e+}01$

Axial component  $A_a = -3.457\text{e-}04$

Rhombic component  $A_r = -7.142\text{e-}05$

rhombicity  $R = 0.207$

Asimmetry parameter  $\text{etha} = 3.099\text{e-}01$

GDO =  $4.086\text{e-}04$

SVD condition number is  $8.665\text{e+}00$

Axial component  $A_a = 4.050\text{e-}04$

Rhombic component  $A_r = 2.232\text{e-}04$

rhombicity  $R = 0.551$

Asimmetry parameter  $\text{etha} = 8.268\text{e-}01$

GDO =  $5.417\text{e-}04$

ZY'Z'' Euler Angles (degrees)

Set 1

(9.2, 80.9, 168.6)

Set 2

(-170.8, -80.9, -11.4)

ZY'Z'' Euler Angles (degrees)

Set 1

(107.5, 136.1, -154.6)

Set 2

(-72.5, -136.1, 25.4)

## Bootstrapping analysis

### Estrone

Distribution size=512  
Distribution type=Gaussian  
CSA general Std. Dev=0.0007 ppm  
Alignment tensor  
<A'x> = 7.345e-05 Std.Dev = 1.507e-05  
<A'y> = 1.562e-04 Std.Dev = 1.525e-05  
<A'z> = -2.297e-04 Std.Dev = 6.480e-06  
Quality factors statistic  
<Q> = 0.107  
StdDev(Q) = 0.015  
Highest Q = 0.170  
Lowest Q = 0.063

### 13-epi-estrone

Distribution size=512  
Distribution type=Gaussian  
CSA general Std. Dev=0.0007 ppm  
Alignment tensor  
<A'x> = -2.803e-05 Std.Dev = 1.474e-05  
<A'y> = -2.360e-04 Std.Dev = 8.037e-05  
<A'z> = 2.640e-04 Std.Dev = 8.606e-05  
Quality factors statistic  
<Q> = 0.224  
StdDev(Q) = 0.016  
Highest Q = 0.273  
Lowest Q = 0.180

## Alignment tensor of $^1D_{CH}$ analysis of

**(3R\*,7S\*,11R\*)-1b**

Conformationally averaged solution

Alignment tensor

A'x= 2.068e-05

A'y= 2.660e-04

A'z=-2.867e-04

Saupe tensor

S'x= 3.102e-05

S'y= 3.991e-04

S'z=-4.301e-04

Alignment tensor eigenvectors

e[x]=( 0.326, 0.779, 0.536)

e[y]=(-0.232,-0.483, 0.844)

e[z]=( 0.916,-0.400, 0.024)

Alignment tensor in laboratory  
coordinates:

[-2.242e-04,1.401e-04,-5.476e-05]

[ 1.401e-04,2.895e-05,-9.721e-05]

[-5.476e-05,-9.721e-05,1.953e-04]

SVD condition number is 4.002e+00

Axial component Aa = -4.301e-04

Rhombic component Ar = -2.454e-04

rhombicity R = 0.571

Asimmetry parameter etha =8.558e-01

GDO = 5.805e-04

ZY'Z" Euler Angles (degrees)

Set 1

(-23.6,88.7,122.4)

Set 2

(156.4,-88.7,-57.6)

Grid points: 16

**(3S\*,7S\*,11R\*)-1b**

Conformationally averaged solution

Alignment tensor

A'x=-2.584e-06

A'y=-2.716e-04

A'z= 2.741e-04

Saupe tensor

S'x=-3.876e-06

S'y=-4.073e-04

S'z= 4.112e-04

Alignment tensor eigenvectors

e[x]=( 0.076, 0.983,-0.169)

e[y]=(-0.995, 0.065,-0.069)

e[z]=(-0.057, 0.174, 0.983)

Alignment tensor in laboratory  
coordinates:

[-2.682e-04,1.471e-05,-3.416e-05]

[ 1.471e-05,4.620e-06,4.847e-05]

[-3.416e-05,4.847e-05,2.636e-04]

SVD condition number is 3.092e+00

Axial component Aa = 4.112e-04

Rhombic component Ar = 2.690e-04

rhombicity R = 0.654

Asimmetry parameter etha =9.811e-01

GDO = 5.779e-04

ZY'Z" Euler Angles (degrees)

Set 1

(108.2,10.5,-22.3)

Set 2

(-71.8,-10.5,157.7)

Grid points: 16

## Alignment tensor of $^{13}\text{C}$ RCSA analysis of

### (3R\*,7S\*,11R\*)-1b

Conformationally averaged solution

Alignment tensor

A'x=-1.209e-05

A'y=-2.882e-04

A'z= 3.003e-04

Saupe tensor

S'x=-1.814e-05

S'y=-4.323e-04

S'z= 4.504e-04

Alignment tensor eigenvectors

e[x]=( 0.302, 0.728, 0.615)

e[y]=( 0.910,-0.412, 0.040)

e[z]=( 0.283, 0.548,-0.787)

Alignment tensor in laboratory  
coordinates:

[-2.158e-04,1.520e-04,-7.971e-05]

[ 1.520e-04,3.474e-05,-1.301e-04]

[-7.971e-05,-1.301e-04,1.811e-04]

SVD condition number is 5.570e+00

Axial component Aa = 4.504e-04

Rhombic component Ar = 2.761e-04

rhombicity R = 0.613

Asimmetry parameter etha =9.195e-01

GDO = 6.204e-04

ZY'Z'' Euler Angles (degrees)

Set 1

(62.7,141.9,176.3)

Set 2

(-117.3,-141.9,-3.7)

### (3S\*,7S\*,11R\*)-1b

Conformationally averaged solution

Alignment tensor

A'x=-2.998e-05

A'y=-3.805e-04

A'z= 4.105e-04

Saupe tensor

S'x=-4.497e-05

S'y=-5.707e-04

S'z= 6.157e-04

Alignment tensor eigenvectors

e[x]=( 0.064,-0.994, 0.086)

e[y]=( 0.995, 0.071, 0.070)

e[z]=(-0.075, 0.081, 0.994)

Alignment tensor in laboratory  
coordinates:

[-3.745e-04,-2.731e-05,-5.719e-05]

[-2.731e-05,-2.882e-05,3.382e-05]

[-5.719e-05,3.382e-05,4.034e-04]

SVD condition number is 6.742e+00

Axial component Aa = 6.157e-04

Rhombic component Ar = 3.505e-04

rhombicity R = 0.569

Asimmetry parameter etha =8.539e-01

GDO = 8.305e-04

ZY'Z'' Euler Angles (degrees)

Set 1

(132.8,6.4,141.1)

Set 2

(-47.2,-6.4,-38.9)
